# Supplementary material for: Plasma Proteomics Characteristics of Subclinical Vitamin E Deficiency of Dairy Cows During Early Lactation
Source: Front Vet Sci. 2021 Dec 10;8:723898. doi: 10.3389/fvets.2021.723898 (PMC8703030; doi:10.3389/fvets.2021.723898)
Supplement: Supplementary file 3 [file Table_6.xlsx]

## Sheet: proteinGroups
Protein IDs	Majority protein IDs	Peptide counts (all)	Peptide counts (razor+unique)	Peptide counts (unique)	Fasta headers	Number of proteins	Peptides	Razor + unique peptides	Unique peptides	Peptides A087_1	Peptides A087_2	Peptides A087_3	Razor + unique peptides A087_1	Razor + unique peptides A087_2	Razor + unique peptides A087_3	Unique peptides A087_1	Unique peptides A087_2	Unique peptides A087_3	Sequence coverage [%]	Unique + razor sequence coverage [%]	Unique sequence coverage [%]	Mol. weight [kDa]	Sequence length	Sequence lengths	Fraction average	Fraction 1	Fraction 2	Fraction 3	Fraction 4	Fraction 5	Fraction 6	Q-value	Score	Identification type A087_1	Identification type A087_2	Identification type A087_3	Reporter intensity 0	Reporter intensity 1	Reporter intensity 2	Reporter intensity 3	Reporter intensity 4	Reporter intensity 5	Reporter intensity 6	Reporter intensity 7	Reporter intensity 8	Reporter intensity 9	Reporter intensity not corrected 0	Reporter intensity not corrected 1	Reporter intensity not corrected 2
sp|A6QPQ2|SPA38_BOVIN;tr|A0A0A0MP89|A0A0A0MP89_BOVIN	sp|A6QPQ2|SPA38_BOVIN;tr|A0A0A0MP89|A0A0A0MP89_BOVIN	11;9	8;7	7;7	>sp|A6QPQ2|SPA38_BOVIN Serpin A3-8 OS=Bos taurus OX=9913 GN=SERPINA3-8 PE=2 SV=1;>tr|A0A0A0MP89|A0A0A0MP89_BOVIN Serpin A3-8 OS=Bos taurus OX=9913 GN=SERPINA3-8 PE=3 SV=2	2	11	8	7	8	6	9	5	3	6	5	3	5	30.4	23.9	22.2	46.963	418	418;429	3.33	3	4	3	1	6	1	0	120.32	By MS/MS	By MS/MS	By MS/MS	1351300	1312200	1390900	1367500	1376300	1271700	1467800	1923500	1407700	1697300	1351300	1312200	1390900
sp|E1BF81|CBG_BOVIN;CON__ENSEMBL:ENSBTAP00000023402	sp|E1BF81|CBG_BOVIN;CON__ENSEMBL:ENSBTAP00000023402	4;4	4;4	4;4	>sp|E1BF81|CBG_BOVIN Corticosteroid-binding globulin OS=Bos taurus OX=9913 GN=SERPINA6 PE=3 SV=1;>ENSEMBL:ENSBTAP00000023402 (Bos taurus) 46 kDa protein	2	4	4	4	4	4	2	4	4	2	4	4	2	12.4	12.4	12.4	45.102	404	404;411	2.31	4	7				2	0	42.103	By MS/MS	By MS/MS	By MS/MS	1614700	2306000	2600100	1799600	2486000	1455400	1605600	1484300	1177200	2050900	1614700	2306000	2600100
sp|G3MYZ3|AFAM_BOVIN;CON__REFSEQ:XP_585019	sp|G3MYZ3|AFAM_BOVIN;CON__REFSEQ:XP_585019	19;19	19;19	19;19	>sp|G3MYZ3|AFAM_BOVIN Afamin OS=Bos taurus OX=9913 GN=AFM PE=1 SV=1;>REFSEQ:XP_585019 (Bos taurus) similar to afamin	2	19	19	19	17	11	15	17	11	15	17	11	15	32.6	32.6	32.6	69.561	604	604;604	4.21	3	1	12	19	11	12	0	282.51	By MS/MS	By MS/MS	By MS/MS	3762500	3380200	3390400	2432200	3668600	2659700	4641900	5502700	3912800	3945900	3762500	3380200	3390400
sp|O02659|MBL2_BOVIN	sp|O02659|MBL2_BOVIN	8	8	8	>sp|O02659|MBL2_BOVIN Mannose-binding protein C OS=Bos taurus OX=9913 GN=MBL PE=2 SV=1	1	8	8	8	7	8	7	7	8	7	7	8	7	30.9	30.9	30.9	26.471	249	249	3.1	6	8	5	3	7	2	0	225.86	By MS/MS	By MS/MS	By MS/MS	5335300	6494000	6617800	5645000	5252900	6351100	4599500	4887100	5457700	5632100	5335300	6494000	6617800
sp|O46375|TTHY_BOVIN;tr|A0A3Q1MRM2|A0A3Q1MRM2_BOVIN	sp|O46375|TTHY_BOVIN;tr|A0A3Q1MRM2|A0A3Q1MRM2_BOVIN	6;5	6;5	6;5	>sp|O46375|TTHY_BOVIN Transthyretin OS=Bos taurus OX=9913 GN=TTR PE=1 SV=1;>tr|A0A3Q1MRM2|A0A3Q1MRM2_BOVIN Transthyretin OS=Bos taurus OX=9913 GN=TTR PE=3 SV=1	2	6	6	6	6	6	5	6	6	5	6	6	5	40.1	40.1	40.1	15.727	147	147;181	3.54	10	10	10	3	14	10	0	257.79	By MS/MS	By MS/MS	By MS/MS	21055000	24485000	27169000	15422000	42401000	20378000	33654000	36570000	18146000	17045000	21055000	24485000	27169000
sp|P00442|SODC_BOVIN;tr|F1MNQ4|F1MNQ4_BOVIN	sp|P00442|SODC_BOVIN;tr|F1MNQ4|F1MNQ4_BOVIN	3;2	3;2	3;2	>sp|P00442|SODC_BOVIN Superoxide dismutase [Cu-Zn] OS=Bos taurus OX=9913 GN=SOD1 PE=1 SV=2;>tr|F1MNQ4|F1MNQ4_BOVIN Superoxide dismutase [Cu-Zn] OS=Bos taurus OX=9913 PE=3 SV=2	2	3	3	3	2	2	1	2	2	1	2	2	1	22.4	22.4	22.4	15.682	152	152;152	3.2		2		3			0	3.491	By MS/MS	By MS/MS	By matching	33475	70164	27303	31612	19793	37731	25951	49651	37911	36871	33475	70164	27303
sp|P00735|THRB_BOVIN;CON__P00735;tr|A0A452DI66|A0A452DI66_BOVIN	sp|P00735|THRB_BOVIN;CON__P00735;tr|A0A452DI66|A0A452DI66_BOVIN	47;47;46	47;47;46	47;47;46	>sp|P00735|THRB_BOVIN Prothrombin OS=Bos taurus OX=9913 GN=F2 PE=1 SV=2;>P00735 SWISS-PROT:P00735 (Bos taurus) Prothrombin precursor (Fragment);>tr|A0A452DI66|A0A452DI66_BOVIN Prothrombin OS=Bos taurus OX=9913 GN=F2 PE=3 SV=1	3	47	47	47	42	42	44	42	42	44	42	42	44	60.6	60.6	60.6	70.505	625	625;625;625	3.52	58	34	62	38	32	66	0	323.31	By MS/MS	By MS/MS	By MS/MS	58555000	51435000	55063000	56446000	52357000	59128000	72789000	67157000	56404000	61739000	58555000	51435000	55063000
sp|P00743|FA10_BOVIN;tr|A0A452DIP8|A0A452DIP8_BOVIN	sp|P00743|FA10_BOVIN;tr|A0A452DIP8|A0A452DIP8_BOVIN	13;13	13;13	13;13	>sp|P00743|FA10_BOVIN Coagulation factor X OS=Bos taurus OX=9913 GN=F10 PE=1 SV=1;>tr|A0A452DIP8|A0A452DIP8_BOVIN Coagulation factor X OS=Bos taurus OX=9913 GN=F10 PE=3 SV=1	2	13	13	13	12	11	9	12	11	9	12	11	9	30.3	30.3	30.3	54.51	492	492;608	3.11	10	13	4	6	1	10	0	323.31	By MS/MS	By MS/MS	By MS/MS	4019200	3680500	4177000	3147400	3817800	3207000	5057900	4271900	4430200	3606800	4019200	3680500	4177000
sp|P00744|PROZ_BOVIN;tr|G1K1X9|G1K1X9_BOVIN;tr|A0A3Q1M8B7|A0A3Q1M8B7_BOVIN	sp|P00744|PROZ_BOVIN;tr|G1K1X9|G1K1X9_BOVIN;tr|A0A3Q1M8B7|A0A3Q1M8B7_BOVIN	3;3;3	3;3;3	3;3;3	>sp|P00744|PROZ_BOVIN Vitamin K-dependent protein Z OS=Bos taurus OX=9913 GN=PROZ PE=1 SV=1;>tr|G1K1X9|G1K1X9_BOVIN Vitamin K-dependent protein Z OS=Bos taurus OX=9913 GN=PROZ PE=3 SV=2;>tr|A0A3Q1M8B7|A0A3Q1M8B7_BOVIN Vitamin K-dependent protein Z OS=Bos t	3	3	3	3	2	1	2	2	1	2	2	1	2	5.1	5.1	5.1	43.112	396	396;442;490	2.62		6		1	1		0	60.229	By MS/MS	By MS/MS	By MS/MS	314410	394550	342340	289870	178860	329120	207610	454640	338380	374040	314410	394550	342340
sp|P01030|CO4_BOVIN	sp|P01030|CO4_BOVIN	53	1	1	>sp|P01030|CO4_BOVIN Complement C4 (Fragments) OS=Bos taurus OX=9913 GN=C4 PE=1 SV=2	1	53	1	1	43	41	49	1	0	1	1	0	1	52.9	2.5	2.5	101.55	920	920	5					3		0	163.88	By MS/MS	By matching	By MS/MS	46338	40134	52392	75373	48378	50890	50602	57941	107100	55701	46338	40134	52392
sp|P01044|KNG1_BOVIN;CON__P01044-1	sp|P01044|KNG1_BOVIN;CON__P01044-1	39;39	1;1	0;0	>sp|P01044|KNG1_BOVIN Kininogen-1 OS=Bos taurus OX=9913 GN=KNG1 PE=1 SV=1;>P01044-1 SWISS-PROT:P01044-1 (Bos taurus) Isoform HMW of Kininogen-1 precursor	2	39	1	0	36	35	35	1	1	1	0	0	0	58.3	2.7	0	68.889	621	621;621	1.7	11	4	5				0	79.421	By MS/MS	By MS/MS	By MS/MS	3464300	6612800	4455800	1514900	4335100	3769600	3099200	6535100	4533500	2681900	3464300	6612800	4455800
sp|P01045|KNG2_BOVIN;CON__P01045-1	sp|P01045|KNG2_BOVIN;CON__P01045-1	33;33	6;6	6;6	>sp|P01045|KNG2_BOVIN Kininogen-2 OS=Bos taurus OX=9913 GN=KNG2 PE=1 SV=1;>P01045-1 SWISS-PROT:P01045-1 (Bos taurus) Isoform HMW of Kininogen-2 precursor	2	33	6	6	29	28	28	5	4	4	5	4	4	56.2	10.8	10.8	68.709	619	619;619	3.8	11	7	3	11	18	10	0	102.4	By MS/MS	By MS/MS	By MS/MS	15247000	29492000	19419000	7881400	20778000	17994000	18724000	34301000	13908000	14372000	15247000	29492000	19419000
sp|P01888|B2MG_BOVIN;tr|A0A3Q1MU93|A0A3Q1MU93_BOVIN	sp|P01888|B2MG_BOVIN;tr|A0A3Q1MU93|A0A3Q1MU93_BOVIN	5;5	5;5	5;5	>sp|P01888|B2MG_BOVIN Beta-2-microglobulin OS=Bos taurus OX=9913 GN=B2M PE=1 SV=2;>tr|A0A3Q1MU93|A0A3Q1MU93_BOVIN Beta-2-microglobulin OS=Bos taurus OX=9913 PE=3 SV=1	2	5	5	5	3	5	3	3	5	3	3	5	3	43.2	43.2	43.2	13.677	118	118;119	3.35	3		8	3		3	0	40.053	By MS/MS	By MS/MS	By MS/MS	890090	1109200	939730	805780	956140	949640	1195300	1055600	750370	831000	890090	1109200	939730
sp|P01966|HBA_BOVIN;CON__P01966;tr|A0A452DIQ5|A0A452DIQ5_BOVIN;tr|F1MMI1|F1MMI1_BOVIN;tr|E1BAP8|E1BAP8_BOVIN	sp|P01966|HBA_BOVIN;CON__P01966;tr|A0A452DIQ5|A0A452DIQ5_BOVIN	11;11;10;1;1	11;11;10;1;1	11;11;10;1;1	>sp|P01966|HBA_BOVIN Hemoglobin subunit alpha OS=Bos taurus OX=9913 GN=HBA PE=1 SV=2;>P01966 SWISS-PROT:P01966 (Bos taurus) Hemoglobin subunit alpha;>tr|A0A452DIQ5|A0A452DIQ5_BOVIN Uncharacterized protein OS=Bos taurus OX=9913 GN=HBA1 PE=3 SV=1	5	11	11	11	10	10	11	10	10	11	10	10	11	74.6	74.6	74.6	15.184	142	142;142;136;142;153	3.15	25	26	22	11	14	18	0	323.31	By MS/MS	By MS/MS	By MS/MS	70203000	144580000	68361000	49582000	66752000	29840000	64714000	102940000	62109000	38720000	70203000	144580000	68361000
sp|P02070|HBB_BOVIN;CON__P02070;tr|G3N1Y3|G3N1Y3_BOVIN;sp|P02081|HBBF_BOVIN;CON__Q3SX09;tr|A0A3Q1MGU4|A0A3Q1MGU4_BOVIN;tr|E1BEL8|E1BEL8_BOVIN;tr|E1B976|E1B976_BOVIN	sp|P02070|HBB_BOVIN;CON__P02070	19;19;4;4;4;2;1;1	19;19;4;4;4;2;1;1	19;19;4;4;4;2;1;1	>sp|P02070|HBB_BOVIN Hemoglobin subunit beta OS=Bos taurus OX=9913 GN=HBB PE=1 SV=1;>P02070 SWISS-PROT:P02070 (Bos taurus) Hemoglobin subunit beta	8	19	19	19	18	17	18	18	17	18	18	17	18	97.2	97.2	97.2	15.954	145	145;145;145;145;201;140;147;150	3.77	28	32	44	22	42	50	0	323.31	By MS/MS	By MS/MS	By MS/MS	153020000	359640000	124070000	94523000	142930000	66110000	142780000	244750000	148750000	79512000	153020000	359640000	124070000
sp|P02192|MYG_BOVIN	sp|P02192|MYG_BOVIN	1	1	1	>sp|P02192|MYG_BOVIN Myoglobin OS=Bos taurus OX=9913 GN=MB PE=1 SV=3	1	1	1	1	0	1	0	0	1	0	0	1	0	5.2	5.2	5.2	17.077	154	154	2		1					0.0073529	2.1462	By matching	By MS/MS	By matching	3962.9	20105	2610.2	3389.2	1829.2	3982.8	3635.3	4525.4	2323.5	3275	3962.9	20105	2610.2
sp|P02672|FIBA_BOVIN;CON__P02672;tr|A0A3Q1LVV7|A0A3Q1LVV7_BOVIN;tr|F6QND5|F6QND5_BOVIN	sp|P02672|FIBA_BOVIN;CON__P02672;tr|A0A3Q1LVV7|A0A3Q1LVV7_BOVIN;tr|F6QND5|F6QND5_BOVIN	18;18;18;18	18;18;18;18	18;18;18;18	>sp|P02672|FIBA_BOVIN Fibrinogen alpha chain OS=Bos taurus OX=9913 GN=FGA PE=1 SV=5;>P02672 SWISS-PROT:P02672 (Bos taurus) Fibrinogen alpha chain precursor;>tr|A0A3Q1LVV7|A0A3Q1LVV7_BOVIN Fibrinogen alpha chain OS=Bos taurus OX=9913 GN=FGA PE=4 SV=1;>tr|F6	4	18	18	18	13	12	15	13	12	15	13	12	15	29.4	29.4	29.4	67.011	615	615;615;818;863	4.28	3	5	4	20	11	14	0	184.15	By MS/MS	By MS/MS	By MS/MS	2091800	1552100	1880000	1929200	2081900	1670800	1949800	2495200	2296300	2086100	2091800	1552100	1880000
sp|P06868|PLMN_BOVIN;CON__P06868	sp|P06868|PLMN_BOVIN;CON__P06868	75;75	75;75	5;5	>sp|P06868|PLMN_BOVIN Plasminogen OS=Bos taurus OX=9913 GN=PLG PE=1 SV=2;>P06868 SWISS-PROT:P06868 (Bos taurus) Plasminogen precursor	2	75	75	5	59	60	72	59	60	72	3	5	5	71.9	71.9	10.5	91.215	812	812;812	3.49	74	85	64	82	95	62	0	323.31	By MS/MS	By MS/MS	By MS/MS	85286000	84619000	86412000	81827000	78663000	89171000	93784000	92526000	74911000	81545000	85286000	84619000	86412000
sp|P07224|PROS_BOVIN;CON__P07224;tr|A0A3Q1MKZ3|A0A3Q1MKZ3_BOVIN;tr|A0A3Q1MMH1|A0A3Q1MMH1_BOVIN;tr|A0A3Q1NAF6|A0A3Q1NAF6_BOVIN	sp|P07224|PROS_BOVIN;CON__P07224;tr|A0A3Q1MKZ3|A0A3Q1MKZ3_BOVIN;tr|A0A3Q1MMH1|A0A3Q1MMH1_BOVIN;tr|A0A3Q1NAF6|A0A3Q1NAF6_BOVIN	18;18;17;16;15	18;18;17;16;15	18;18;17;16;15	>sp|P07224|PROS_BOVIN Vitamin K-dependent protein S OS=Bos taurus OX=9913 GN=PROS1 PE=1 SV=1;>P07224 SWISS-PROT:P07224 (Bos taurus) Vitamin K-dependent protein S precursor;>tr|A0A3Q1MKZ3|A0A3Q1MKZ3_BOVIN Vitamin K-dependent protein S OS=Bos taurus OX=9913	5	18	18	18	12	14	14	12	14	14	12	14	14	30.7	30.7	30.7	75.132	675	675;675;676;633;619	3.48	10	16		10	22	4	0	323.31	By MS/MS	By MS/MS	By MS/MS	3346100	3648600	3895300	3179000	3968000	3472900	4956000	3836700	3396200	3637200	3346100	3648600	3895300
sp|P07455|IGF1_BOVIN;tr|F2X2F3|F2X2F3_BOVIN;tr|F2X2F1|F2X2F1_BOVIN	sp|P07455|IGF1_BOVIN;tr|F2X2F3|F2X2F3_BOVIN;tr|F2X2F1|F2X2F1_BOVIN	1;1;1	1;1;1	1;1;1	>sp|P07455|IGF1_BOVIN Insulin-like growth factor I OS=Bos taurus OX=9913 GN=IGF1 PE=1 SV=2;>tr|F2X2F3|F2X2F3_BOVIN Insulin-like growth factor I OS=Bos taurus OX=9913 GN=IGF1 PE=2 SV=1;>tr|F2X2F1|F2X2F1_BOVIN Insulin-like growth factor I OS=Bos taurus OX=99	3	1	1	1	0	1	1	0	1	1	0	1	1	9.1	9.1	9.1	17.066	154	154;172;188	4				2			0	14.36	By matching	By MS/MS	By MS/MS	24234	23854	30899	21636	26589	21148	29618	21630	21976	29331	24234	23854	30899
sp|P07589|FINC_BOVIN;tr|G5E5A8|G5E5A8_BOVIN;tr|G5E5B0|G5E5B0_BOVIN;tr|G5E5A9|G5E5A9_BOVIN;tr|A0A3Q1NHX9|A0A3Q1NHX9_BOVIN;tr|A0A3Q1M4K6|A0A3Q1M4K6_BOVIN	sp|P07589|FINC_BOVIN;tr|G5E5A8|G5E5A8_BOVIN;tr|G5E5B0|G5E5B0_BOVIN;tr|G5E5A9|G5E5A9_BOVIN;tr|A0A3Q1NHX9|A0A3Q1NHX9_BOVIN;tr|A0A3Q1M4K6|A0A3Q1M4K6_BOVIN	62;62;62;62;60;57	62;62;62;62;60;57	62;62;62;62;60;57	>sp|P07589|FINC_BOVIN Fibronectin OS=Bos taurus OX=9913 GN=FN1 PE=1 SV=4;>tr|G5E5A8|G5E5A8_BOVIN Fibronectin OS=Bos taurus OX=9913 GN=FN1 PE=4 SV=1;>tr|G5E5B0|G5E5B0_BOVIN Fibronectin OS=Bos taurus OX=9913 GN=FN1 PE=4 SV=1;>tr|G5E5A9|G5E5A9_BOVIN Fibronect	6	62	62	62	53	55	49	53	55	49	53	55	49	30.8	30.8	30.8	272.15	2478	2478;2510;2511;2601;2268;2163	3.91	35	30	37	43	70	54	0	323.31	By MS/MS	By MS/MS	By MS/MS	24366000	26799000	26736000	24084000	25095000	32243000	33585000	37223000	13809000	23566000	24366000	26799000	26736000
sp|P12763|FETUA_BOVIN;CON__P12763	sp|P12763|FETUA_BOVIN;CON__P12763	15;15	15;15	15;15	>sp|P12763|FETUA_BOVIN Alpha-2-HS-glycoprotein OS=Bos taurus OX=9913 GN=AHSG PE=1 SV=2;>P12763 SWISS-PROT:P12763 (Bos taurus) Alpha-2-HS-glycoprotein precursor	2	15	15	15	13	14	13	13	14	13	13	14	13	40.7	40.7	40.7	38.418	359	359;359	3.07	37	34	22	21	34	10	0	323.31	By MS/MS	By MS/MS	By MS/MS	48779000	70665000	56322000	38771000	53306000	51319000	62976000	61090000	45350000	56275000	48779000	70665000	56322000
sp|P13384|IBP2_BOVIN;tr|F1N2P8|F1N2P8_BOVIN	sp|P13384|IBP2_BOVIN;tr|F1N2P8|F1N2P8_BOVIN	6;3	6;3	6;3	>sp|P13384|IBP2_BOVIN Insulin-like growth factor-binding protein 2 OS=Bos taurus OX=9913 GN=IGFBP2 PE=1 SV=2;>tr|F1N2P8|F1N2P8_BOVIN Insulin-like growth factor-binding protein 2 OS=Bos taurus OX=9913 GN=IGFBP2 PE=4 SV=2	2	6	6	6	4	1	4	4	1	4	4	1	4	26.2	26.2	26.2	34.015	317	317;285	3.56	1	3			5		0	78.133	By MS/MS	By MS/MS	By MS/MS	152900	193180	150490	156750	146630	161610	170480	181200	125540	152480	152900	193180	150490
sp|P15497|APOA1_BOVIN;CON__P15497;tr|A0A3Q1MJJ4|A0A3Q1MJJ4_BOVIN;REV__tr|F1MGG2|F1MGG2_BOVIN	sp|P15497|APOA1_BOVIN;CON__P15497;tr|A0A3Q1MJJ4|A0A3Q1MJJ4_BOVIN	56;56;39;1	56;56;39;1	56;56;39;1	>sp|P15497|APOA1_BOVIN Apolipoprotein A-I OS=Bos taurus OX=9913 GN=APOA1 PE=1 SV=3;>P15497 SWISS-PROT:P15497 (Bos taurus) Apolipoprotein A-I precursor;>tr|A0A3Q1MJJ4|A0A3Q1MJJ4_BOVIN Apolipoprotein A-I OS=Bos taurus OX=9913 GN=APOA1 PE=1 SV=1	4	56	56	56	52	49	46	52	49	46	52	49	46	90.9	90.9	90.9	30.276	265	265;265;250;462	3.69	141	78	87	97	184	130	0	323.31	By MS/MS	By MS/MS	By MS/MS	464220000	795130000	792270000	434440000	922840000	724120000	498530000	461130000	315920000	433550000	464220000	795130000	792270000
sp|P17697|CLUS_BOVIN;CON__P17697	sp|P17697|CLUS_BOVIN;CON__P17697	10;10	10;10	10;10	>sp|P17697|CLUS_BOVIN Clusterin OS=Bos taurus OX=9913 GN=CLU PE=1 SV=1;>P17697 SWISS-PROT:P17697 (Bos taurus) Clusterin precursor	2	10	10	10	8	8	4	8	8	4	8	8	4	28.9	28.9	28.9	51.113	439	439;439	2.8	10	5	3	8	1	3	0	323.31	By MS/MS	By MS/MS	By MS/MS	2531700	2646000	3247600	2710100	3080600	2665700	3317200	3432100	2506300	2847400	2531700	2646000	3247600
sp|P18902|RET4_BOVIN;tr|G1K122|G1K122_BOVIN;tr|A0A3Q1MSW9|A0A3Q1MSW9_BOVIN	sp|P18902|RET4_BOVIN;tr|G1K122|G1K122_BOVIN;tr|A0A3Q1MSW9|A0A3Q1MSW9_BOVIN	13;13;13	13;13;13	13;13;13	>sp|P18902|RET4_BOVIN Retinol-binding protein 4 OS=Bos taurus OX=9913 GN=RBP4 PE=1 SV=1;>tr|G1K122|G1K122_BOVIN Retinol-binding protein OS=Bos taurus OX=9913 GN=RBP4 PE=3 SV=1;>tr|A0A3Q1MSW9|A0A3Q1MSW9_BOVIN Retinol-binding protein 4 OS=Bos taurus OX=9913	3	13	13	13	13	11	11	13	11	11	13	11	11	71.6	71.6	71.6	21.068	183	183;201;262	3.55	8	16	24	12	16	12	0	323.31	By MS/MS	By MS/MS	By MS/MS	11165000	10976000	11439000	9627100	13976000	9816800	15353000	11522000	12174000	10837000	11165000	10976000	11439000
sp|P19034|APOC2_BOVIN;tr|A0A3Q1NJ76|A0A3Q1NJ76_BOVIN	sp|P19034|APOC2_BOVIN;tr|A0A3Q1NJ76|A0A3Q1NJ76_BOVIN	2;2	2;2	2;2	>sp|P19034|APOC2_BOVIN Apolipoprotein C-II OS=Bos taurus OX=9913 GN=APOC2 PE=1 SV=2;>tr|A0A3Q1NJ76|A0A3Q1NJ76_BOVIN Apolipoprotein C-II OS=Bos taurus OX=9913 GN=APOC2 PE=4 SV=1	2	2	2	2	0	2	2	0	2	2	0	2	2	9.9	9.9	9.9	11.061	101	101;255	4.8				3		2	0	3.1525	By matching	By MS/MS	By MS/MS	80453	97298	101330	76663	118900	78918	93383	102690	99885	62528	80453	97298	101330
sp|P19035|APOC3_BOVIN	sp|P19035|APOC3_BOVIN	11	11	11	>sp|P19035|APOC3_BOVIN Apolipoprotein C-III OS=Bos taurus OX=9913 GN=APOC3 PE=1 SV=2	1	11	11	11	11	11	8	11	11	8	11	11	8	61.5	61.5	61.5	10.692	96	96	4.07	12	13	15	17	29	28	0	323.31	By MS/MS	By MS/MS	By MS/MS	32950000	31854000	39680000	22779000	55146000	43119000	34115000	40023000	20685000	30757000	32950000	31854000	39680000
sp|P20959|IBP3_BOVIN	sp|P20959|IBP3_BOVIN	3	3	3	>sp|P20959|IBP3_BOVIN Insulin-like growth factor-binding protein 3 OS=Bos taurus OX=9913 GN=IGFBP3 PE=1 SV=3	1	3	3	3	2	2	2	2	2	2	2	2	2	10.7	10.7	10.7	31.57	291	291	1.83	3	1	2				0	6.3449	By MS/MS	By MS/MS	By MS/MS	265430	259360	427000	221250	381280	234640	380690	280080	204880	261700	265430	259360	427000
sp|P21327|INPP_BOVIN	sp|P21327|INPP_BOVIN	1	1	1	>sp|P21327|INPP_BOVIN Inositol polyphosphate 1-phosphatase OS=Bos taurus OX=9913 GN=INPP1 PE=1 SV=2	1	1	1	1	1	1	1	1	1	1	1	1	1	4.5	4.5	4.5	43.965	400	400	1	4						1	-2	By matching	By MS/MS	By MS/MS	4881200	9720000	9740800	4529100	6005500	4204500	3656200	5060800	8243400	9666100	4881200	9720000	9740800
sp|P23805|CONG_BOVIN;tr|E1BEZ9|E1BEZ9_BOVIN	sp|P23805|CONG_BOVIN	11;2	11;2	8;2	>sp|P23805|CONG_BOVIN Conglutinin OS=Bos taurus OX=9913 GN=CGN1 PE=1 SV=2	2	11	11	8	10	10	10	10	10	10	8	7	7	28.3	28.3	21.8	37.994	371	371;363	3.85	3	17	6	12	19	10	0	323.31	By MS/MS	By MS/MS	By MS/MS	4888100	2583000	4665700	1913000	2666300	2837200	7335900	4213400	2066900	5396700	4888100	2583000	4665700
sp|P25326|CATS_BOVIN	sp|P25326|CATS_BOVIN	2	2	2	>sp|P25326|CATS_BOVIN Cathepsin S OS=Bos taurus OX=9913 GN=CTSS PE=1 SV=2	1	2	2	2	1	2	2	1	2	2	1	2	2	8.8	8.8	8.8	37.176	331	331	3.5	3			3	4		0	27.296	By MS/MS	By MS/MS	By MS/MS	208230	204960	233800	191780	246370	276230	243690	244100	359600	224550	208230	204960	233800
sp|P28782|S10A8_BOVIN	sp|P28782|S10A8_BOVIN	1	1	1	>sp|P28782|S10A8_BOVIN Protein S100-A8 OS=Bos taurus OX=9913 GN=S100A8 PE=1 SV=2	1	1	1	1	1	0	1	1	0	1	1	0	1	13.5	13.5	13.5	10.46	89	89	2		2					0	5.2662	By MS/MS	By matching	By matching	27734	33861	26516	31786	23693	23159	25771	26705	25811	25933	27734	33861	26516
sp|P28800|A2AP_BOVIN;CON__P28800	sp|P28800|A2AP_BOVIN;CON__P28800	21;21	21;21	21;21	>sp|P28800|A2AP_BOVIN Alpha-2-antiplasmin OS=Bos taurus OX=9913 GN=SERPINF2 PE=1 SV=2;>P28800 SWISS-PROT:P28800 (Bos taurus) Alpha-2-antiplasmin precursor	2	21	21	21	19	20	19	19	20	19	19	20	19	29.3	29.3	29.3	54.71	492	492;492	3.49	15	25	24	34	21	15	0	323.31	By MS/MS	By MS/MS	By MS/MS	22590000	24102000	28252000	24501000	21533000	28110000	28251000	29074000	21276000	23673000	22590000	24102000	28252000
sp|P33433|HRG_BOVIN	sp|P33433|HRG_BOVIN	9	1	1	>sp|P33433|HRG_BOVIN Histidine-rich glycoprotein (Fragments) OS=Bos taurus OX=9913 GN=HRG PE=1 SV=1	1	9	1	1	8	8	8	1	1	1	1	1	1	23.2	4	4	44.47	396	396	2.56		4	5				0	92.13	By MS/MS	By MS/MS	By MS/MS	2286000	2221100	2365300	2572900	2127400	1882500	2934500	2257400	2484000	2308700	2286000	2221100	2365300
sp|P34955|A1AT_BOVIN;CON__P34955	sp|P34955|A1AT_BOVIN;CON__P34955	15;15	15;15	15;15	>sp|P34955|A1AT_BOVIN Alpha-1-antiproteinase OS=Bos taurus OX=9913 GN=SERPINA1 PE=1 SV=1;>P34955 SWISS-PROT:P34955 (Bos taurus) Alpha-1-antiproteinase precursor	2	15	15	15	13	14	11	13	14	11	13	14	11	26.4	26.4	26.4	46.103	416	416;416	3.81		11	15	24	10	7	0	323.31	By MS/MS	By MS/MS	By MS/MS	5270100	6055100	6273200	4723300	7124000	5453900	7688400	5860800	4909400	5951000	5270100	6055100	6273200
sp|P35445|COMP_BOVIN	sp|P35445|COMP_BOVIN	1	1	1	>sp|P35445|COMP_BOVIN Cartilage oligomeric matrix protein OS=Bos taurus OX=9913 GN=COMP PE=1 SV=2	1	1	1	1	1	1	1	1	1	1	1	1	1	2	2	2	82.362	756	756	2		3					0	12.312	By MS/MS	By MS/MS	By MS/MS	191610	179030	203420	180910	165700	161540	276440	223550	138300	179470	191610	179030	203420
sp|P35541|SAA_BOVIN;tr|A0A452DJ43|A0A452DJ43_BOVIN;tr|A0A3Q1M5X4|A0A3Q1M5X4_BOVIN	sp|P35541|SAA_BOVIN;tr|A0A452DJ43|A0A452DJ43_BOVIN;tr|A0A3Q1M5X4|A0A3Q1M5X4_BOVIN	12;12;6	12;12;6	3;3;3	>sp|P35541|SAA_BOVIN Serum amyloid A protein OS=Bos taurus OX=9913 GN=SAA1 PE=1 SV=2;>tr|A0A452DJ43|A0A452DJ43_BOVIN Serum amyloid A protein OS=Bos taurus OX=9913 GN=SAA2 PE=3 SV=1;>tr|A0A3Q1M5X4|A0A3Q1M5X4_BOVIN Serum amyloid A protein OS=Bos taurus OX=99	3	12	12	3	10	9	9	10	9	9	3	1	2	65.4	65.4	23.8	14.516	130	130;177;142	3.09	24	12	4	7	1	19	0	323.31	By MS/MS	By MS/MS	By MS/MS	11146000	6003700	12347000	13534000	8129100	5346900	4556800	10978000	29618000	12850000	11146000	6003700	12347000
sp|P80012|VWF_BOVIN;tr|A0A3Q1LLU1|A0A3Q1LLU1_BOVIN;tr|F1N0R5|F1N0R5_BOVIN	sp|P80012|VWF_BOVIN;tr|A0A3Q1LLU1|A0A3Q1LLU1_BOVIN;tr|F1N0R5|F1N0R5_BOVIN	4;4;4	4;4;4	4;4;4	>sp|P80012|VWF_BOVIN von Willebrand factor (Fragment) OS=Bos taurus OX=9913 GN=VWF PE=1 SV=2;>tr|A0A3Q1LLU1|A0A3Q1LLU1_BOVIN von Willebrand factor OS=Bos taurus OX=9913 GN=VWF PE=4 SV=1;>tr|F1N0R5|F1N0R5_BOVIN von Willebrand factor OS=Bos taurus OX=9913 GN	3	4	4	4	2	2	1	2	2	1	2	2	1	4.9	4.9	4.9	102.6	937	937;2810;2811	2.67	1	3		1	1		0	23.64	By MS/MS	By MS/MS	By MS/MS	178420	317730	147280	170640	155560	133960	180530	334270	345670	273180	178420	317730	147280
sp|P80109|PHLD_BOVIN;tr|A0A3Q1LW12|A0A3Q1LW12_BOVIN;tr|F1MNM2|F1MNM2_BOVIN;tr|A0A3Q1MQZ5|A0A3Q1MQZ5_BOVIN;tr|A0A3Q1MEX6|A0A3Q1MEX6_BOVIN	sp|P80109|PHLD_BOVIN;tr|A0A3Q1LW12|A0A3Q1LW12_BOVIN;tr|F1MNM2|F1MNM2_BOVIN;tr|A0A3Q1MQZ5|A0A3Q1MQZ5_BOVIN;tr|A0A3Q1MEX6|A0A3Q1MEX6_BOVIN	11;11;11;10;10	11;11;11;10;10	11;11;11;10;10	>sp|P80109|PHLD_BOVIN Phosphatidylinositol-glycan-specific phospholipase D OS=Bos taurus OX=9913 GN=GPLD1 PE=1 SV=1;>tr|A0A3Q1LW12|A0A3Q1LW12_BOVIN Phosphatidylinositol-glycan-specific phospholipase D OS=Bos taurus OX=9913 GN=GPLD1 PE=4 SV=1;>tr|F1MNM2|F1M	5	11	11	11	10	9	7	10	9	7	10	9	7	18.4	18.4	18.4	92.601	839	839;843;852;774;827	3.88	5	7	7		11	10	0	207.21	By MS/MS	By MS/MS	By MS/MS	3130300	3543600	3407600	3297900	3663700	3596600	3934500	3648900	3438300	3545000	3130300	3543600	3407600
sp|P81265|PIGR_BOVIN;tr|F1MR22|F1MR22_BOVIN;tr|G5E6M1|G5E6M1_BOVIN	sp|P81265|PIGR_BOVIN;tr|F1MR22|F1MR22_BOVIN;tr|G5E6M1|G5E6M1_BOVIN	9;7;5	9;7;5	9;7;5	>sp|P81265|PIGR_BOVIN Polymeric immunoglobulin receptor OS=Bos taurus OX=9913 GN=PIGR PE=2 SV=1;>tr|F1MR22|F1MR22_BOVIN Polymeric immunoglobulin receptor OS=Bos taurus OX=9913 GN=PIGR PE=4 SV=3;>tr|G5E6M1|G5E6M1_BOVIN Polymeric immunoglobulin receptor OS=B	3	9	9	9	4	9	5	4	9	5	4	9	5	14.9	14.9	14.9	82.434	757	757;757;539	4	5		3	4	8	5	0	119.83	By MS/MS	By MS/MS	By MS/MS	1149000	931900	1047300	988090	1208400	1141300	1990700	2970100	1207600	3633900	1149000	931900	1047300
sp|P81644|APOA2_BOVIN;CON__P81644	sp|P81644|APOA2_BOVIN;CON__P81644	8;8	8;8	8;8	>sp|P81644|APOA2_BOVIN Apolipoprotein A-II OS=Bos taurus OX=9913 GN=APOA2 PE=1 SV=2;>P81644 SWISS-PROT:P81644 (Bos taurus) Apolipoprotein A-II precursor	2	8	8	8	8	7	6	8	7	6	8	7	6	72	72	72	11.202	100	100;100	3.9	21	2	7	12	25	20	0	318.23	By MS/MS	By MS/MS	By MS/MS	66380000	49333000	70726000	52529000	84382000	54052000	73023000	72718000	53673000	77332000	66380000	49333000	70726000
sp|P82943|REG1_BOVIN	sp|P82943|REG1_BOVIN	3	3	3	>sp|P82943|REG1_BOVIN Regakine-1 OS=Bos taurus OX=9913 PE=1 SV=2	1	3	3	3	3	3	3	3	3	3	3	3	3	40.2	40.2	40.2	10.281	92	92	2.2	7				3		0	102.83	By MS/MS	By MS/MS	By MS/MS	1203100	979440	1090600	1183800	1093400	1025400	1280600	1541500	1015200	1020400	1203100	979440	1090600
sp|Q02366|NDUA6_BOVIN;tr|A0A452DIB4|A0A452DIB4_BOVIN	sp|Q02366|NDUA6_BOVIN;tr|A0A452DIB4|A0A452DIB4_BOVIN	1;1	1;1	1;1	>sp|Q02366|NDUA6_BOVIN NADH dehydrogenase [ubiquinone] 1 alpha subcomplex subunit 6 OS=Bos taurus OX=9913 GN=NDUFA6 PE=1 SV=2;>tr|A0A452DIB4|A0A452DIB4_BOVIN NADH dehydrogenase [ubiquinone] 1 alpha subcomplex subunit 6 OS=Bos taurus OX=9913 GN=NDUFA6 PE=3	2	1	1	1	0	1	1	0	1	1	0	1	1	5.5	5.5	5.5	15.053	128	128;154	3.5	1					1	1	-2	By matching	By MS/MS	By MS/MS	1447500	1400800	1479200	1556100	723350	1052600	1740700	1476100	1787400	1378600	1447500	1400800	1479200
sp|Q05443|LUM_BOVIN;CON__Q05443	sp|Q05443|LUM_BOVIN;CON__Q05443	8;8	8;8	8;8	>sp|Q05443|LUM_BOVIN Lumican OS=Bos taurus OX=9913 GN=LUM PE=1 SV=1;>Q05443 SWISS-PROT:Q05443 (Bos taurus) Lumican precursor	2	8	8	8	6	7	4	6	7	4	6	7	4	25.4	25.4	25.4	38.756	342	342;342	3.08	10	1	1	2	9	1	0	252.21	By MS/MS	By MS/MS	By MS/MS	1514800	1538900	1641400	1370200	1589000	1385300	1734100	2276300	1787300	1713700	1514800	1538900	1641400
sp|Q05717|IBP5_BOVIN	sp|Q05717|IBP5_BOVIN	2	2	2	>sp|Q05717|IBP5_BOVIN Insulin-like growth factor-binding protein 5 OS=Bos taurus OX=9913 GN=IGFBP5 PE=2 SV=2	1	2	2	2	0	2	2	0	2	2	0	2	2	8.1	8.1	8.1	30.314	271	271	4				4			0.0037453	2.4848	By matching	By matching	By MS/MS	11972	6419.1	7907.6	7314.1	5076	3411.6	9579.2	12713	7214.3	11565	11972	6419.1	7907.6
sp|Q0VCM5|ITIH1_BOVIN;CON__Q0VCM5;tr|A0A3Q1LVM5|A0A3Q1LVM5_BOVIN;tr|A0A3Q1LW96|A0A3Q1LW96_BOVIN	sp|Q0VCM5|ITIH1_BOVIN;CON__Q0VCM5;tr|A0A3Q1LVM5|A0A3Q1LVM5_BOVIN;tr|A0A3Q1LW96|A0A3Q1LW96_BOVIN	37;37;36;36	1;1;1;1	1;1;1;1	>sp|Q0VCM5|ITIH1_BOVIN Inter-alpha-trypsin inhibitor heavy chain H1 OS=Bos taurus OX=9913 GN=ITIH1 PE=1 SV=1;>Q0VCM5 TREMBL:Q0VCM5 (Bos taurus) Similar to Inter-alpha-trypsin inhibitor heavy chain H1;>tr|A0A3Q1LVM5|A0A3Q1LVM5_BOVIN Inter-alpha-trypsin inhi	4	37	1	1	35	34	26	0	1	0	0	1	0	46.2	2.3	2.3	101.24	906	906;906;899;903	5					1		0	82.922	By matching	By MS/MS	By matching	14580	93570	10880	14716	131570	7295.9	16092	9227.1	10132	7078.6	14580	93570	10880
sp|Q0VCX1|C1S_BOVIN;tr|F1MJ12|F1MJ12_BOVIN;tr|A0A3Q1M7Q5|A0A3Q1M7Q5_BOVIN	sp|Q0VCX1|C1S_BOVIN;tr|F1MJ12|F1MJ12_BOVIN;tr|A0A3Q1M7Q5|A0A3Q1M7Q5_BOVIN	11;11;10	11;11;10	11;11;10	>sp|Q0VCX1|C1S_BOVIN Complement C1s subcomponent OS=Bos taurus OX=9913 GN=C1S PE=2 SV=2;>tr|F1MJ12|F1MJ12_BOVIN Complement C1s subcomponent OS=Bos taurus OX=9913 GN=C1S PE=3 SV=1;>tr|A0A3Q1M7Q5|A0A3Q1M7Q5_BOVIN Complement C1s subcomponent OS=Bos taurus OX=	3	11	11	11	10	10	10	10	10	10	10	10	10	17	17	17	76.608	689	689;695;697	3.2	3	12	11	6	4	4	0	280.6	By MS/MS	By MS/MS	By MS/MS	2503300	2342600	2423300	2329700	2635600	2621400	3015800	2537700	2505800	2486100	2503300	2342600	2423300
sp|Q28065|C4BPA_BOVIN;CON__Q28065;tr|A0A3Q1LUK9|A0A3Q1LUK9_BOVIN	sp|Q28065|C4BPA_BOVIN;CON__Q28065;tr|A0A3Q1LUK9|A0A3Q1LUK9_BOVIN	33;33;25	33;33;25	28;28;22	>sp|Q28065|C4BPA_BOVIN C4b-binding protein alpha chain OS=Bos taurus OX=9913 GN=C4BPA PE=2 SV=1;>Q28065 SWISS-PROT:Q28065 (Bos taurus) C4b-binding protein alpha chain precursor;>tr|A0A3Q1LUK9|A0A3Q1LUK9_BOVIN C4b-binding protein alpha chain OS=Bos taurus O	3	33	33	28	30	32	29	30	32	29	26	27	25	52.6	52.6	42.8	68.886	610	610;610;567	3.1	65	35	22	8	19	46	0	323.31	By MS/MS	By MS/MS	By MS/MS	46452000	47690000	53861000	45370000	58268000	55060000	58161000	57482000	43481000	54639000	46452000	47690000	53861000
sp|Q28085|CFAH_BOVIN;CON__Q28085	sp|Q28085|CFAH_BOVIN;CON__Q28085	87;87	87;87	4;4	>sp|Q28085|CFAH_BOVIN Complement factor H OS=Bos taurus OX=9913 GN=CFH PE=1 SV=3;>Q28085 SWISS-PROT:Q28085 (Bos taurus) Complement factor H precursor	2	87	87	4	70	72	73	70	72	73	1	3	3	75.6	75.6	5.7	140.37	1236	1236;1236	3.45	81	65	97	102	102	48	0	323.31	By MS/MS	By MS/MS	By MS/MS	73644000	63191000	74152000	63161000	74100000	71992000	98608000	85168000	77425000	85838000	73644000	63191000	74152000
sp|Q29423|CD44_BOVIN;tr|Q0VD03|Q0VD03_BOVIN;tr|F1MHC3|F1MHC3_BOVIN;tr|A0A3Q1MHE2|A0A3Q1MHE2_BOVIN;tr|A0A3Q1M161|A0A3Q1M161_BOVIN;tr|A0A3Q1LHV0|A0A3Q1LHV0_BOVIN;tr|A0A3Q1MDJ9|A0A3Q1MDJ9_BOVIN;tr|A0A3Q1M0L0|A0A3Q1M0L0_BOVIN;tr|A0A3Q1LZS6|A0A3Q1LZS6_BOVIN;tr|F1MQT9|F1MQT9_BOVIN	sp|Q29423|CD44_BOVIN;tr|Q0VD03|Q0VD03_BOVIN;tr|F1MHC3|F1MHC3_BOVIN;tr|A0A3Q1MHE2|A0A3Q1MHE2_BOVIN;tr|A0A3Q1M161|A0A3Q1M161_BOVIN;tr|A0A3Q1LHV0|A0A3Q1LHV0_BOVIN;tr|A0A3Q1MDJ9|A0A3Q1MDJ9_BOVIN;tr|A0A3Q1M0L0|A0A3Q1M0L0_BOVIN;tr|A0A3Q1LZS6|A0A3Q1LZS6_BOVIN;tr|F1MQT9|F1MQT9_BOVIN	2;2;2;2;2;2;2;2;2;2	2;2;2;2;2;2;2;2;2;2	2;2;2;2;2;2;2;2;2;2	>sp|Q29423|CD44_BOVIN CD44 antigen OS=Bos taurus OX=9913 GN=CD44 PE=2 SV=1;>tr|Q0VD03|Q0VD03_BOVIN CD44 antigen OS=Bos taurus OX=9913 GN=CD44 PE=2 SV=1;>tr|F1MHC3|F1MHC3_BOVIN CD44 antigen OS=Bos taurus OX=9913 GN=CD44 PE=4 SV=2;>tr|A0A3Q1MHE2|A0A3Q1MHE2_B	10	2	2	2	1	1	1	1	1	1	1	1	1	5.7	5.7	5.7	40.001	366	366;368;433;541;582;608;630;661;673;703	2.67	2					1	0	4.6508	By MS/MS	By MS/MS	By MS/MS	111470	99197	94182	110460	90878	92464	112450	193650	107970	129880	111470	99197	94182
sp|Q29437|AOCX_BOVIN;tr|E1BJN3|E1BJN3_BOVIN	sp|Q29437|AOCX_BOVIN;tr|E1BJN3|E1BJN3_BOVIN	28;26	28;26	12;12	>sp|Q29437|AOCX_BOVIN Primary amine oxidase, liver isozyme OS=Bos taurus OX=9913 PE=1 SV=1;>tr|E1BJN3|E1BJN3_BOVIN Amine oxidase OS=Bos taurus OX=9913 GN=SAO PE=1 SV=2	2	28	28	12	27	24	24	27	24	24	12	12	11	48.8	48.8	23.9	84.756	762	762;692	3.43	64	43	22	22	33	63	0	323.31	By MS/MS	By MS/MS	By MS/MS	26870000	31536000	27154000	27156000	26106000	30698000	28683000	33864000	24107000	27452000	26870000	31536000	27154000
sp|Q29RQ1|CO7_BOVIN;CON__Q29RQ1	sp|Q29RQ1|CO7_BOVIN;CON__Q29RQ1	37;37	2;2	2;2	>sp|Q29RQ1|CO7_BOVIN Complement component C7 OS=Bos taurus OX=9913 GN=C7 PE=2 SV=1;>Q29RQ1 SWISS-PROT:Q29RQ1 (Bos taurus) Complement component C7 precursor	2	37	2	2	30	29	29	2	2	0	2	2	0	48.9	3.6	3.6	93.089	843	843;843	2	2		2				0	8.8734	By MS/MS	By matching	By matching	69898	122100	110690	68950	117550	89747	96859	97892	71976	67054	69898	122100	110690
sp|Q2KIS7|TETN_BOVIN;CON__Q2KIS7;tr|A0A3Q1LZS5|A0A3Q1LZS5_BOVIN;tr|A0A452DIU4|A0A452DIU4_BOVIN	sp|Q2KIS7|TETN_BOVIN;CON__Q2KIS7;tr|A0A3Q1LZS5|A0A3Q1LZS5_BOVIN;tr|A0A452DIU4|A0A452DIU4_BOVIN	9;9;9;9	9;9;9;9	9;9;9;9	>sp|Q2KIS7|TETN_BOVIN Tetranectin OS=Bos taurus OX=9913 GN=CLEC3B PE=2 SV=1;>Q2KIS7 SWISS-PROT:Q2KIS7 (Bos taurus) Tetranectin precursor;>tr|A0A3Q1LZS5|A0A3Q1LZS5_BOVIN Tetranectin OS=Bos taurus OX=9913 GN=CLEC3B PE=4 SV=1;>tr|A0A452DIU4|A0A452DIU4_BOVIN T	4	9	9	9	7	8	7	7	8	7	7	8	7	53	53	53	22.144	202	202;202;203;282	3.24	10	6	11	5	7	6	0	323.31	By MS/MS	By MS/MS	By MS/MS	3053300	3202600	3153300	2873200	3648600	2877100	4004400	3304500	3282200	2872900	3053300	3202600	3153300
sp|Q2KIT0|HP20_BOVIN;CON__Q2KIT0	sp|Q2KIT0|HP20_BOVIN;CON__Q2KIT0	13;13	13;13	13;13	>sp|Q2KIT0|HP20_BOVIN Protein HP-20 homolog OS=Bos taurus OX=9913 PE=2 SV=1;>Q2KIT0 TREMBL:Q2KIT0 (Bos taurus) Similar to collagen, type X, alpha 1	2	13	13	13	10	10	11	10	10	11	10	10	11	65.4	65.4	65.4	20.646	191	191;191	2.78	23	30	17	2	13	9	0	323.31	By MS/MS	By MS/MS	By MS/MS	26313000	38496000	23365000	21322000	28059000	26494000	31263000	31174000	22913000	36725000	26313000	38496000	23365000
sp|Q2KIU3|HP252_BOVIN;CON__Q2KIU3	sp|Q2KIU3|HP252_BOVIN;CON__Q2KIU3	5;5	5;5	5;5	>sp|Q2KIU3|HP252_BOVIN Protein HP-25 homolog 2 OS=Bos taurus OX=9913 PE=2 SV=1;>Q2KIU3 TREMBL:Q2KIU3 (Bos taurus) Similar to C1q and tumor necrosis factor related protein 5	2	5	5	5	5	5	4	5	5	4	5	5	4	31.6	31.6	31.6	22.911	215	215;215	3.31	17	11	5	7	9	13	0	135.92	By MS/MS	By MS/MS	By MS/MS	20046000	22898000	22238000	18801000	23477000	21771000	28838000	26975000	22619000	22619000	20046000	22898000	22238000
sp|Q2KIV9|C1QB_BOVIN	sp|Q2KIV9|C1QB_BOVIN	9	9	9	>sp|Q2KIV9|C1QB_BOVIN Complement C1q subcomponent subunit B OS=Bos taurus OX=9913 GN=C1QB PE=1 SV=1	1	9	9	9	9	6	6	9	6	6	9	6	6	35.2	35.2	35.2	26.399	247	247	3.7	6	2	7	14	5	6	0	323.31	By MS/MS	By MS/MS	By MS/MS	3121600	3382900	3443400	3130300	3435300	3790200	3457000	3261200	3090100	3650100	3121600	3382900	3443400
sp|Q2KIX7|HP251_BOVIN	sp|Q2KIX7|HP251_BOVIN	11	11	11	>sp|Q2KIX7|HP251_BOVIN Protein HP-25 homolog 1 OS=Bos taurus OX=9913 PE=1 SV=1	1	11	11	11	11	8	8	11	8	8	11	8	8	35.8	35.8	35.8	22.555	212	212	2.69	9	31	9		6	6	0	323.31	By MS/MS	By MS/MS	By MS/MS	7741400	7671300	6732000	7103900	7889300	7272200	9940800	9776600	8113900	8966900	7741400	7671300	6732000
sp|Q2KJ63|KLKB1_BOVIN	sp|Q2KJ63|KLKB1_BOVIN	13	13	13	>sp|Q2KJ63|KLKB1_BOVIN Plasma kallikrein OS=Bos taurus OX=9913 GN=KLKB1 PE=2 SV=1	1	13	13	13	10	9	11	10	9	11	10	9	11	25.8	25.8	25.8	70.993	636	636	3.98	4	6	6	8	7	11	0	244.69	By MS/MS	By MS/MS	By MS/MS	1571000	1650300	1935000	1517200	1962500	1588300	2183400	1650100	1633600	1616000	1571000	1650300	1935000
sp|Q2KJF1|A1BG_BOVIN;CON__Q2KJF1;tr|A0A3Q1MJT2|A0A3Q1MJT2_BOVIN	sp|Q2KJF1|A1BG_BOVIN;CON__Q2KJF1;tr|A0A3Q1MJT2|A0A3Q1MJT2_BOVIN	25;25;24	25;25;24	25;25;24	>sp|Q2KJF1|A1BG_BOVIN Alpha-1B-glycoprotein OS=Bos taurus OX=9913 GN=A1BG PE=1 SV=1;>Q2KJF1 TREMBL:Q2KJF1 (Bos taurus) Alpha-1-B glycoprotein;>tr|A0A3Q1MJT2|A0A3Q1MJT2_BOVIN Alpha-1B-glycoprotein OS=Bos taurus OX=9913 GN=A1BG PE=1 SV=1	3	25	25	25	20	19	25	20	19	25	20	19	25	49.3	49.3	49.3	53.553	503	503;503;586	3.06	29	47	47	26	27	12	0	323.31	By MS/MS	By MS/MS	By MS/MS	33101000	28887000	29751000	27977000	30887000	30068000	36930000	34797000	33422000	31681000	33101000	28887000	29751000
sp|Q2KJH6|SERPH_BOVIN	sp|Q2KJH6|SERPH_BOVIN	4	4	4	>sp|Q2KJH6|SERPH_BOVIN Serpin H1 OS=Bos taurus OX=9913 GN=SERPINH1 PE=2 SV=1	1	4	4	4	1	4	2	1	4	2	1	4	2	14.1	14.1	14.1	46.506	418	418	3.86	1			4	2		0	28.101	By MS/MS	By MS/MS	By MS/MS	185630	159180	175160	212360	209820	150770	324980	246140	340520	186390	185630	159180	175160
sp|Q2UVX4|CO3_BOVIN;CON__Q2UVX4;tr|G3X7A5|G3X7A5_BOVIN;tr|A0A3Q1M2B2|A0A3Q1M2B2_BOVIN;tr|A0A3Q1MHV6|A0A3Q1MHV6_BOVIN;tr|A0A3Q1MGT0|A0A3Q1MGT0_BOVIN	sp|Q2UVX4|CO3_BOVIN;CON__Q2UVX4;tr|G3X7A5|G3X7A5_BOVIN;tr|A0A3Q1M2B2|A0A3Q1M2B2_BOVIN;tr|A0A3Q1MHV6|A0A3Q1MHV6_BOVIN;tr|A0A3Q1MGT0|A0A3Q1MGT0_BOVIN	159;158;157;155;150;150	159;158;157;155;150;150	159;158;157;155;150;150	>sp|Q2UVX4|CO3_BOVIN Complement C3 OS=Bos taurus OX=9913 GN=C3 PE=1 SV=2;>Q2UVX4 SWISS-PROT:Q2UVX4 (Bos taurus) Complement C3 precursor;>tr|G3X7A5|G3X7A5_BOVIN Complement C3 OS=Bos taurus OX=9913 GN=C3 PE=1 SV=1;>tr|A0A3Q1M2B2|A0A3Q1M2B2_BOVIN Complement C	6	159	159	159	151	141	135	151	141	135	151	141	135	78.9	78.9	78.9	187.25	1661	1661;1662;1661;1630;1601;1610	3.34	292	265	274	165	234	238	0	323.31	By MS/MS	By MS/MS	By MS/MS	472400000	623460000	600050000	406560000	588210000	587020000	509900000	563750000	356000000	516300000	472400000	623460000	600050000
sp|Q32KY0|APOD_BOVIN;tr|F1MS32|F1MS32_BOVIN	sp|Q32KY0|APOD_BOVIN;tr|F1MS32|F1MS32_BOVIN	8;8	8;8	8;8	>sp|Q32KY0|APOD_BOVIN Apolipoprotein D OS=Bos taurus OX=9913 GN=APOD PE=2 SV=1;>tr|F1MS32|F1MS32_BOVIN Apolipoprotein D OS=Bos taurus OX=9913 GN=APOD PE=3 SV=3	2	8	8	8	7	6	5	7	6	5	7	6	5	42.3	42.3	42.3	21.401	189	189;212	2.81	11	2	5	4		5	0	323.31	By MS/MS	By MS/MS	By MS/MS	4694800	2260800	5379200	2207200	6515700	3782100	7184000	2176600	2509400	2605100	4694800	2260800	5379200
sp|Q32L76|SAA4_BOVIN	sp|Q32L76|SAA4_BOVIN	8	8	8	>sp|Q32L76|SAA4_BOVIN Serum amyloid A-4 protein OS=Bos taurus OX=9913 GN=SAA4 PE=2 SV=1	1	8	8	8	6	5	7	6	5	7	6	5	7	50.4	50.4	50.4	14.687	129	129	3.13	12	4	7	3	9	4	0	167.51	By MS/MS	By MS/MS	By MS/MS	3152100	3049200	3314100	4020700	3640600	3686700	2714300	2787100	5057700	3342900	3152100	3049200	3314100
sp|Q3MHN2|CO9_BOVIN;CON__Q3MHN2;tr|A0A3Q1MU98|A0A3Q1MU98_BOVIN	sp|Q3MHN2|CO9_BOVIN;CON__Q3MHN2;tr|A0A3Q1MU98|A0A3Q1MU98_BOVIN	34;34;31	34;34;31	34;34;31	>sp|Q3MHN2|CO9_BOVIN Complement component C9 OS=Bos taurus OX=9913 GN=C9 PE=2 SV=1;>Q3MHN2 SWISS-PROT:Q3MHN2 (Bos taurus) Complement component C9 precursor;>tr|A0A3Q1MU98|A0A3Q1MU98_BOVIN Complement component C9 OS=Bos taurus OX=9913 GN=C9 PE=1 SV=1	3	34	34	34	28	27	29	28	27	29	28	27	29	53.8	53.8	53.8	61.998	548	548;548;506	2.91	40	33	15	32	10	16	0	323.31	By MS/MS	By MS/MS	By MS/MS	20651000	23208000	20703000	19146000	22115000	20057000	24552000	24724000	21727000	21223000	20651000	23208000	20703000
sp|Q3MHN5|VTDB_BOVIN;CON__Q3MHN5	sp|Q3MHN5|VTDB_BOVIN;CON__Q3MHN5	44;44	2;2	2;2	>sp|Q3MHN5|VTDB_BOVIN Vitamin D-binding protein OS=Bos taurus OX=9913 GN=GC PE=2 SV=1;>Q3MHN5 SWISS-PROT:Q3MHN5 (Bos taurus) Vitamin D-binding protein precursor	2	44	2	2	38	38	39	2	2	1	2	2	1	68.1	2.3	2.3	53.341	474	474;474	1.43	4	3					0	32.926	By MS/MS	By MS/MS	By MS/MS	1318100	2400900	768250	2590600	505750	825560	4689400	526720	817810	848210	1318100	2400900	768250
sp|Q3SYR5|APOC4_BOVIN	sp|Q3SYR5|APOC4_BOVIN	4	4	4	>sp|Q3SYR5|APOC4_BOVIN Apolipoprotein C-IV OS=Bos taurus OX=9913 GN=APOC4 PE=2 SV=1	1	4	4	4	3	4	1	3	4	1	3	4	1	31.5	31.5	31.5	14.437	127	127	1.56	6	1	2				0	20.366	By MS/MS	By MS/MS	By MS/MS	1224300	1834300	1831600	1908000	2281300	1353600	1034000	842310	1135400	768730	1224300	1834300	1831600
sp|Q3SZV7|HEMO_BOVIN;tr|A0A452DI25|A0A452DI25_BOVIN;CON__Q3SZV7;tr|A0A3Q1N2E0|A0A3Q1N2E0_BOVIN	sp|Q3SZV7|HEMO_BOVIN;tr|A0A452DI25|A0A452DI25_BOVIN;CON__Q3SZV7;tr|A0A3Q1N2E0|A0A3Q1N2E0_BOVIN	37;35;35;24	37;35;35;24	37;35;35;24	>sp|Q3SZV7|HEMO_BOVIN Hemopexin OS=Bos taurus OX=9913 GN=HPX PE=2 SV=1;>tr|A0A452DI25|A0A452DI25_BOVIN Hemopexin OS=Bos taurus OX=9913 GN=HPX PE=4 SV=1;>Q3SZV7 TREMBL:Q3SZV7 (Bos taurus) Similar to hemopexin;>tr|A0A3Q1N2E0|A0A3Q1N2E0_BOVIN Hemopexin OS=Bos	4	37	37	37	32	30	34	32	30	34	32	30	34	65.8	65.8	65.8	52.209	459	459;459;460;425	3.22	105	70	62	46	54	72	0	323.31	By MS/MS	By MS/MS	By MS/MS	143830000	118860000	160690000	157050000	132060000	139000000	159060000	179660000	128090000	192320000	143830000	118860000	160690000
sp|Q3T004|SAMP_BOVIN	sp|Q3T004|SAMP_BOVIN	2	2	2	>sp|Q3T004|SAMP_BOVIN Serum amyloid P-component OS=Bos taurus OX=9913 GN=APCS PE=2 SV=1	1	2	2	2	2	2	2	2	2	2	2	2	2	9.4	9.4	9.4	25.183	224	224	4.44			3		5	1	0	4.1677	By MS/MS	By MS/MS	By MS/MS	191790	204770	260690	143870	378230	276110	221920	199370	202140	155180	191790	204770	260690
sp|Q3T0A3|CFAD_BOVIN	sp|Q3T0A3|CFAD_BOVIN	5	5	5	>sp|Q3T0A3|CFAD_BOVIN Complement factor D OS=Bos taurus OX=9913 GN=CFD PE=2 SV=1	1	5	5	5	4	4	5	4	4	5	4	4	5	29.7	29.7	29.7	27.878	259	259	3.2	1	4	6	8	1		0	61.997	By MS/MS	By MS/MS	By MS/MS	231740	232090	236000	240500	249720	223970	283680	244400	291260	259870	231740	232090	236000
sp|Q3Y5Z3|ADIPO_BOVIN;CON__Q3Y5Z3;tr|A0A3Q1M564|A0A3Q1M564_BOVIN	sp|Q3Y5Z3|ADIPO_BOVIN;CON__Q3Y5Z3;tr|A0A3Q1M564|A0A3Q1M564_BOVIN	6;6;6	6;6;6	6;6;6	>sp|Q3Y5Z3|ADIPO_BOVIN Adiponectin OS=Bos taurus OX=9913 GN=ADIPOQ PE=1 SV=1;>Q3Y5Z3 SWISS-PROT:Q3Y5Z3 (Bos taurus) Adiponectin precursor;>tr|A0A3Q1M564|A0A3Q1M564_BOVIN Adiponectin OS=Bos taurus OX=9913 GN=ADIPOQ PE=4 SV=1	3	6	6	6	5	5	4	5	5	4	5	5	4	26.7	26.7	26.7	26.133	240	240;240;328	4.59	3		1		13	5	0	219.45	By MS/MS	By MS/MS	By MS/MS	1598800	1860900	1923500	1565000	1833700	2536700	2624700	1770200	1290400	1896400	1598800	1860900	1923500
sp|Q58D62|FETUB_BOVIN;CON__Q58D62	sp|Q58D62|FETUB_BOVIN;CON__Q58D62	12;12	12;12	12;12	>sp|Q58D62|FETUB_BOVIN Fetuin-B OS=Bos taurus OX=9913 GN=FETUB PE=1 SV=1;>Q58D62 SWISS-PROT:Q58D62 (Bos taurus) Fetuin-B precursor	2	12	12	12	8	7	9	8	7	9	8	7	9	28.7	28.7	28.7	42.663	387	387;387	3.44	3	3	17	6	10		0	186.1	By MS/MS	By MS/MS	By MS/MS	5390800	4734700	5807800	5021400	5718400	4437900	7980800	6988500	5693300	5910000	5390800	4734700	5807800
sp|Q5E9E3|C1QA_BOVIN	sp|Q5E9E3|C1QA_BOVIN	5	5	5	>sp|Q5E9E3|C1QA_BOVIN Complement C1q subcomponent subunit A OS=Bos taurus OX=9913 GN=C1QA PE=2 SV=1	1	5	5	5	5	3	3	5	3	3	5	3	3	16.4	16.4	16.4	25.802	244	244	5	1				11	4	0	180.54	By MS/MS	By MS/MS	By MS/MS	3358200	3754100	4230600	3107800	4030800	4386300	4308400	3848300	2795600	2780700	3358200	3754100	4230600
sp|Q5E9Z2|HABP2_BOVIN	sp|Q5E9Z2|HABP2_BOVIN	4	4	4	>sp|Q5E9Z2|HABP2_BOVIN Hyaluronan-binding protein 2 OS=Bos taurus OX=9913 GN=HABP2 PE=2 SV=1	1	4	4	4	3	3	2	3	3	2	3	3	2	7.2	7.2	7.2	62.44	558	558	4.27	3		1		1	6	0	34.176	By MS/MS	By MS/MS	By MS/MS	749940	760840	810940	740670	696290	733960	952800	855030	673120	755710	749940	760840	810940
sp|Q7SIH1|A2MG_BOVIN;CON__ENSEMBL:ENSBTAP00000024146;tr|A0A452DI08|A0A452DI08_BOVIN;tr|A0A3Q1LMP7|A0A3Q1LMP7_BOVIN	sp|Q7SIH1|A2MG_BOVIN;CON__ENSEMBL:ENSBTAP00000024146	95;92;30;23	95;92;30;23	94;91;30;23	>sp|Q7SIH1|A2MG_BOVIN Alpha-2-macroglobulin OS=Bos taurus OX=9913 GN=A2M PE=1 SV=2;>ENSEMBL:ENSBTAP00000024146 (Bos taurus) similar to alpha-2-macroglobulin isoform 1	4	95	95	94	89	90	84	89	90	84	88	89	83	62.1	62.1	61.6	167.57	1510	1510;1477;478;385	3.41	214	241	242	182	157	230	0	323.31	By MS/MS	By MS/MS	By MS/MS	503210000	627780000	646540000	499250000	667140000	511700000	757010000	542610000	451770000	504960000	503210000	627780000	646540000
sp|Q8SPP7|PGRP1_BOVIN;tr|A0A3Q1LPB6|A0A3Q1LPB6_BOVIN	sp|Q8SPP7|PGRP1_BOVIN	5;2	5;2	5;2	>sp|Q8SPP7|PGRP1_BOVIN Peptidoglycan recognition protein 1 OS=Bos taurus OX=9913 GN=PGLYRP1 PE=1 SV=1	2	5	5	5	3	3	2	3	3	2	3	3	2	35.3	35.3	35.3	21.063	190	190;179	3.25	3		1		4		0	35.832	By MS/MS	By MS/MS	By MS/MS	389270	369260	386090	474270	358910	322990	431850	651020	429010	363530	389270	369260	386090
sp|Q95121|PEDF_BOVIN;CON__Q95121	sp|Q95121|PEDF_BOVIN;CON__Q95121	15;15	15;15	15;15	>sp|Q95121|PEDF_BOVIN Pigment epithelium-derived factor OS=Bos taurus OX=9913 GN=SERPINF1 PE=1 SV=1;>Q95121 SWISS-PROT:Q95121 (Bos taurus) Pigment epithelium-derived factor precursor	2	15	15	15	13	14	12	13	14	12	13	14	12	38.2	38.2	38.2	46.228	416	416;416	2.38	28	17	21	7	5	2	0	323.31	By MS/MS	By MS/MS	By MS/MS	9331300	8621500	10424000	8229200	10153000	8321200	12866000	12500000	9200600	9289300	9331300	8621500	10424000
sp|Q95122|CD14_BOVIN;tr|A6QNL0|A6QNL0_BOVIN	sp|Q95122|CD14_BOVIN;tr|A6QNL0|A6QNL0_BOVIN	3;3	3;3	3;3	>sp|Q95122|CD14_BOVIN Monocyte differentiation antigen CD14 OS=Bos taurus OX=9913 GN=CD14 PE=2 SV=2;>tr|A6QNL0|A6QNL0_BOVIN Monocyte differentiation antigen CD14 OS=Bos taurus OX=9913 GN=CD14 PE=2 SV=1	2	3	3	3	1	1	1	1	1	1	1	1	1	11	11	11	39.666	373	373;375	3.33	1		1			1	0	73.951	By MS/MS	By MS/MS	By MS/MS	66771	58299	54452	56479	54432	43994	72518	69743	68896	55262	66771	58299	54452
sp|Q9BGI3|PRDX2_BOVIN	sp|Q9BGI3|PRDX2_BOVIN	3	3	3	>sp|Q9BGI3|PRDX2_BOVIN Peroxiredoxin-2 OS=Bos taurus OX=9913 GN=PRDX2 PE=2 SV=1	1	3	3	3	1	2	3	1	2	3	1	2	3	13.1	13.1	13.1	21.946	199	199	2.83	1	3			2		0	19.12	By MS/MS	By MS/MS	By MS/MS	195540	736640	225900	247720	155510	185780	138650	228030	183070	186760	195540	736640	225900
sp|Q9TTE1|SPA31_BOVIN;sp|A2I7M9|SPA32_BOVIN;tr|A0A452DJK6|A0A452DJK6_BOVIN;CON__Q9TTE1;tr|A0A0A0MP88|A0A0A0MP88_BOVIN;tr|A0A3Q1N535|A0A3Q1N535_BOVIN	sp|Q9TTE1|SPA31_BOVIN;sp|A2I7M9|SPA32_BOVIN;tr|A0A452DJK6|A0A452DJK6_BOVIN;CON__Q9TTE1;tr|A0A0A0MP88|A0A0A0MP88_BOVIN;tr|A0A3Q1N535|A0A3Q1N535_BOVIN	12;12;12;11;10;10	11;11;11;10;9;9	4;4;4;4;4;4	>sp|Q9TTE1|SPA31_BOVIN Serpin A3-1 OS=Bos taurus OX=9913 GN=SERPINA3-1 PE=1 SV=3;>sp|A2I7M9|SPA32_BOVIN Serpin A3-2 OS=Bos taurus OX=9913 GN=SERPINA3-2 PE=3 SV=1;>tr|A0A452DJK6|A0A452DJK6_BOVIN Serpin A3-1 OS=Bos taurus OX=9913 GN=SERPINA3-1 PE=3 SV=1;>Q9T	6	12	11	4	12	10	9	11	9	8	4	3	2	26.8	24.8	10.2	46.236	411	411;411;470;411;400;459	2.63	14	15	8	3	5	4	0	273.27	By MS/MS	By MS/MS	By MS/MS	4939600	5921200	6261500	4899300	5382400	5623600	4838100	5364100	3879700	6237900	4939600	5921200	6261500
tr|A0A0A0MP91|A0A0A0MP91_BOVIN;sp|Q3SYW2|CO2_BOVIN;tr|A0A3S5ZPC6|A0A3S5ZPC6_BOVIN	tr|A0A0A0MP91|A0A0A0MP91_BOVIN;sp|Q3SYW2|CO2_BOVIN;tr|A0A3S5ZPC6|A0A3S5ZPC6_BOVIN	16;16;16	16;16;16	16;16;16	>tr|A0A0A0MP91|A0A0A0MP91_BOVIN Complement C2 OS=Bos taurus OX=9913 GN=C2 PE=3 SV=1;>sp|Q3SYW2|CO2_BOVIN Complement C2 OS=Bos taurus OX=9913 GN=C2 PE=2 SV=1;>tr|A0A3S5ZPC6|A0A3S5ZPC6_BOVIN Complement C2 OS=Bos taurus OX=9913 GN=C2 PE=3 SV=1	3	16	16	16	11	13	15	11	13	15	11	13	15	22.1	22.1	22.1	82.906	750	750;750;787	4.05	7	9		9	24	9	0	150.99	By MS/MS	By MS/MS	By MS/MS	2133900	2282500	2268900	1946000	1936800	2161700	2293600	2480600	2049100	2063700	2133900	2282500	2268900
tr|A0A0A0MP92|A0A0A0MP92_BOVIN;sp|A2I7N3|SPA37_BOVIN;CON__A2I7N3;tr|A0A3Q1MGZ6|A0A3Q1MGZ6_BOVIN;tr|A0A3Q1MGP2|A0A3Q1MGP2_BOVIN	tr|A0A0A0MP92|A0A0A0MP92_BOVIN;sp|A2I7N3|SPA37_BOVIN;CON__A2I7N3;tr|A0A3Q1MGZ6|A0A3Q1MGZ6_BOVIN;tr|A0A3Q1MGP2|A0A3Q1MGP2_BOVIN	12;9;9;8;7	12;9;9;8;7	3;1;1;0;0	>tr|A0A0A0MP92|A0A0A0MP92_BOVIN Serpin A3-7 OS=Bos taurus OX=9913 GN=SERPINA3-7 PE=1 SV=1;>sp|A2I7N3|SPA37_BOVIN Serpin A3-7 OS=Bos taurus OX=9913 GN=SERPINA3-7 PE=3 SV=1;>A2I7N3 TREMBL:A2I7N3;Q27984 (Bos taurus) SERPINA3-7;>tr|A0A3Q1MGZ6|A0A3Q1MGZ6_BOVIN	5	12	12	3	10	11	9	10	11	9	3	3	2	24	24	6.2	47.015	417	417;417;417;397;390	3.56	13	11	8	10	18	10	0	323.31	By MS/MS	By MS/MS	By MS/MS	17590000	24176000	21713000	13447000	20473000	20196000	19755000	23341000	12246000	19052000	17590000	24176000	21713000
tr|A0A0A0MPA0|A0A0A0MPA0_BOVIN	tr|A0A0A0MPA0|A0A0A0MPA0_BOVIN	8	1	1	>tr|A0A0A0MPA0|A0A0A0MPA0_BOVIN Uncharacterized protein OS=Bos taurus OX=9913 GN=LOC784932 PE=1 SV=1	1	8	1	1	7	7	6	1	1	0	1	1	0	16.3	2.2	2.2	46.882	417	417	3			2				0.0072464	1.9742	By MS/MS	By MS/MS	By matching	91243	151250	149150	34664	90665	87855	36909	386890	11803	157450	91243	151250	149150
tr|A0A0N4STN1|A0A0N4STN1_BOVIN;sp|P22226|CTHL1_BOVIN	tr|A0A0N4STN1|A0A0N4STN1_BOVIN;sp|P22226|CTHL1_BOVIN	1;1	1;1	1;1	>tr|A0A0N4STN1|A0A0N4STN1_BOVIN Uncharacterized protein OS=Bos taurus OX=9913 GN=LOC112441458 PE=3 SV=1;>sp|P22226|CTHL1_BOVIN Cathelicidin-1 OS=Bos taurus OX=9913 GN=CATHL1 PE=1 SV=2	2	1	1	1	0	0	1	0	0	1	0	0	1	10.3	10.3	10.3	17.628	155	155;155	2		1					0	6.897	By matching	By matching	By MS/MS	9519.7	8815.5	9821.1	9835.1	6866.1	7992.6	8490.7	9150.6	9027	15256	9519.7	8815.5	9821.1
tr|A0A140T843|A0A140T843_BOVIN;sp|P17690|APOH_BOVIN;CON__P17690;tr|A0A3Q1LXP4|A0A3Q1LXP4_BOVIN	tr|A0A140T843|A0A140T843_BOVIN;sp|P17690|APOH_BOVIN;CON__P17690;tr|A0A3Q1LXP4|A0A3Q1LXP4_BOVIN	17;17;17;15	17;17;17;15	17;17;17;15	>tr|A0A140T843|A0A140T843_BOVIN Beta-2-glycoprotein 1 OS=Bos taurus OX=9913 GN=APOH PE=4 SV=1;>sp|P17690|APOH_BOVIN Beta-2-glycoprotein 1 OS=Bos taurus OX=9913 GN=APOH PE=1 SV=4;>P17690 SWISS-PROT:P17690 (Bos taurus) Beta-2-glycoprotein 1 precursor;>tr|A0A	4	17	17	17	12	14	15	12	14	15	12	14	15	53.9	53.9	53.9	38.245	345	345;345;345;339	3.57	15	17	19	18	9	23	0	323.31	By MS/MS	By MS/MS	By MS/MS	16285000	14937000	15617000	11472000	17418000	14030000	22885000	19474000	17468000	14907000	16285000	14937000	15617000
tr|A0A140T851|A0A140T851_BOVIN;tr|A0A3Q1M616|A0A3Q1M616_BOVIN;sp|P00745|PROC_BOVIN	tr|A0A140T851|A0A140T851_BOVIN;tr|A0A3Q1M616|A0A3Q1M616_BOVIN;sp|P00745|PROC_BOVIN	11;11;10	11;11;10	11;11;10	>tr|A0A140T851|A0A140T851_BOVIN Vitamin K-dependent protein C OS=Bos taurus OX=9913 GN=PROC PE=3 SV=2;>tr|A0A3Q1M616|A0A3Q1M616_BOVIN Vitamin K-dependent protein C OS=Bos taurus OX=9913 GN=PROC PE=3 SV=1;>sp|P00745|PROC_BOVIN Vitamin K-dependent protein C	3	11	11	11	9	10	8	9	10	8	9	10	8	30.8	30.8	30.8	50.708	451	451;459;456	2.67	10	13	4		6	3	0	282.67	By MS/MS	By MS/MS	By MS/MS	1476500	1421700	1595400	1605200	1554200	1468900	1805500	2014200	1495900	1644400	1476500	1421700	1595400
tr|A0A140T891|A0A140T891_BOVIN;sp|Q58CQ9|VNN1_BOVIN	tr|A0A140T891|A0A140T891_BOVIN;sp|Q58CQ9|VNN1_BOVIN	9;9	9;9	9;9	>tr|A0A140T891|A0A140T891_BOVIN Pantetheinase OS=Bos taurus OX=9913 GN=VNN1 PE=4 SV=1;>sp|Q58CQ9|VNN1_BOVIN Pantetheinase OS=Bos taurus OX=9913 GN=VNN1 PE=1 SV=1	2	9	9	9	7	7	4	7	7	4	7	7	4	25.3	25.3	25.3	56.979	510	510;510	4.3	3	1		7	6	6	0	323.31	By MS/MS	By MS/MS	By MS/MS	1004200	1843000	1305700	934680	940360	1211500	1031100	1047700	1100000	1739000	1004200	1843000	1305700
tr|A0A140T897|A0A140T897_BOVIN;sp|P02769|ALBU_BOVIN;CON__P02769;tr|A0A3Q1LNN7|A0A3Q1LNN7_BOVIN	tr|A0A140T897|A0A140T897_BOVIN;sp|P02769|ALBU_BOVIN;CON__P02769;tr|A0A3Q1LNN7|A0A3Q1LNN7_BOVIN	123;118;118;113	123;118;118;113	115;110;110;105	>tr|A0A140T897|A0A140T897_BOVIN Serum albumin OS=Bos taurus OX=9913 GN=ALB PE=4 SV=1;>sp|P02769|ALBU_BOVIN Serum albumin OS=Bos taurus OX=9913 GN=ALB PE=1 SV=4;>P02769 SWISS-PROT:P02769 (Bos taurus) Bovine serum albumin precursor;>tr|A0A3Q1LNN7|A0A3Q1LNN7_	4	123	123	115	116	108	118	116	108	118	108	100	110	94.9	94.9	92.4	69.323	607	607;607;607;576	3.46	713	713	754	674	665	691	0	323.31	By MS/MS	By MS/MS	By MS/MS	11375000000	12512000000	12907000000	10451000000	13928000000	11378000000	15104000000	14531000000	10068000000	11235000000	11375000000	12512000000	12907000000
tr|A0A140T8C8|A0A140T8C8_BOVIN;CON__Q2KJ62	tr|A0A140T8C8|A0A140T8C8_BOVIN;CON__Q2KJ62	39;39	39;39	0;0	>tr|A0A140T8C8|A0A140T8C8_BOVIN Kininogen-1 OS=Bos taurus OX=9913 GN=KNG1 PE=4 SV=1;>Q2KJ62 TREMBL:Q2KJ62 (Bos taurus) KNG protein	2	39	39	0	36	35	35	36	35	35	0	0	0	58.3	58.3	0	68.964	621	621;621	3.4	45	55	87	63	55	36	0	323.31	By MS/MS	By MS/MS	By MS/MS	74572000	81285000	81459000	75421000	78019000	74219000	88393000	91687000	75367000	98022000	74572000	81285000	81459000
tr|A0A140T8D4|A0A140T8D4_BOVIN;sp|Q95M12|LGMN_BOVIN	tr|A0A140T8D4|A0A140T8D4_BOVIN;sp|Q95M12|LGMN_BOVIN	3;3	3;3	3;3	>tr|A0A140T8D4|A0A140T8D4_BOVIN Legumain OS=Bos taurus OX=9913 GN=LGMN PE=4 SV=1;>sp|Q95M12|LGMN_BOVIN Legumain OS=Bos taurus OX=9913 GN=LGMN PE=1 SV=1	2	3	3	3	3	3	2	3	3	2	3	3	2	9.5	9.5	9.5	49.235	433	433;433	4.07		2		9	3	1	0	95.515	By MS/MS	By MS/MS	By MS/MS	155570	187770	180730	148510	267790	137750	244120	153170	152660	205480	155570	187770	180730
tr|A0A3B0IZF8|A0A3B0IZF8_BOVIN	tr|A0A3B0IZF8|A0A3B0IZF8_BOVIN	3	3	3	>tr|A0A3B0IZF8|A0A3B0IZF8_BOVIN Adiponectin B OS=Bos taurus OX=9913 GN=C1QC PE=4 SV=1	1	3	3	3	3	2	3	3	2	3	3	2	3	11.5	11.5	11.5	25.728	243	243	3.71	7			2	9	3	0	147.74	By MS/MS	By MS/MS	By MS/MS	843240	1050200	1032500	800310	1074100	1119600	1195000	970890	766100	971290	843240	1050200	1032500
tr|A0A3Q1LGY9|A0A3Q1LGY9_BOVIN;tr|Q3SZH5|Q3SZH5_BOVIN;CON__Q3SZH5	tr|A0A3Q1LGY9|A0A3Q1LGY9_BOVIN;tr|Q3SZH5|Q3SZH5_BOVIN;CON__Q3SZH5	18;13;13	18;13;13	18;13;13	>tr|A0A3Q1LGY9|A0A3Q1LGY9_BOVIN Angiotensinogen OS=Bos taurus OX=9913 GN=AGT PE=1 SV=1;>tr|Q3SZH5|Q3SZH5_BOVIN Angiotensinogen OS=Bos taurus OX=9913 GN=AGT PE=1 SV=1;>Q3SZH5 TREMBL:Q3SZH5 (Bos taurus) Similar to Angiotensinogen	3	18	18	18	16	15	17	16	15	17	16	15	17	49.6	49.6	49.6	51.424	476	476;424;424	2.94	9	32	38	2	6	10	0	323.31	By MS/MS	By MS/MS	By MS/MS	13458000	14293000	14102000	13727000	13309000	15334000	16258000	16248000	14508000	14179000	13458000	14293000	14102000
tr|A0A3Q1LI44|A0A3Q1LI44_BOVIN	tr|A0A3Q1LI44|A0A3Q1LI44_BOVIN	5	2	2	>tr|A0A3Q1LI44|A0A3Q1LI44_BOVIN Uncharacterized protein OS=Bos taurus OX=9913 PE=4 SV=1	1	5	2	2	5	4	3	2	1	1	2	1	1	47.6	27.3	27.3	15.071	143	143	2.4		3	2				0	107.29	By MS/MS	By MS/MS	By MS/MS	212800	211930	221750	160820	233370	257120	193540	176470	223150	190480	212800	211930	221750
tr|A0A3Q1LI62|A0A3Q1LI62_BOVIN;tr|E1BI31|E1BI31_BOVIN	tr|A0A3Q1LI62|A0A3Q1LI62_BOVIN;tr|E1BI31|E1BI31_BOVIN	1;1	1;1	1;1	>tr|A0A3Q1LI62|A0A3Q1LI62_BOVIN Dipeptidyl peptidase 9 OS=Bos taurus OX=9913 GN=DPP9 PE=3 SV=1;>tr|E1BI31|E1BI31_BOVIN Dipeptidyl peptidase 9 OS=Bos taurus OX=9913 GN=DPP9 PE=3 SV=3	2	1	1	1	1	0	1	1	0	1	1	0	1	1.7	1.7	1.7	91.857	810	810;902	1	2						1	-2	By matching	By matching	By MS/MS	144130	171610	181730	147530	123010	48573	78160	33561	55668	28243	144130	171610	181730
tr|A0A3Q1LIB6|A0A3Q1LIB6_BOVIN;tr|A0A3Q1N4D3|A0A3Q1N4D3_BOVIN;tr|E1BNK2|E1BNK2_BOVIN	tr|A0A3Q1LIB6|A0A3Q1LIB6_BOVIN;tr|A0A3Q1N4D3|A0A3Q1N4D3_BOVIN;tr|E1BNK2|E1BNK2_BOVIN	1;1;1	1;1;1	1;1;1	>tr|A0A3Q1LIB6|A0A3Q1LIB6_BOVIN MutL homolog 3 OS=Bos taurus OX=9913 GN=MLH3 PE=4 SV=1;>tr|A0A3Q1N4D3|A0A3Q1N4D3_BOVIN MutL homolog 3 OS=Bos taurus OX=9913 GN=MLH3 PE=4 SV=1;>tr|E1BNK2|E1BNK2_BOVIN MutL homolog 3 OS=Bos taurus OX=9913 GN=MLH3 PE=4 SV=3	3	1	1	1	1	0	0	1	0	0	1	0	0	0.5	0.5	0.5	163.29	1457	1457;1481;1514	5					1		1	-2	By MS/MS	By matching	By matching	27469	27588	23040	29001	49604	29129	31760	41315	35458	33698	27469	27588	23040
tr|A0A3Q1LJT1|A0A3Q1LJT1_BOVIN	tr|A0A3Q1LJT1|A0A3Q1LJT1_BOVIN	6	6	6	>tr|A0A3Q1LJT1|A0A3Q1LJT1_BOVIN Uncharacterized protein OS=Bos taurus OX=9913 PE=4 SV=1	1	6	6	6	3	5	5	3	5	5	3	5	5	20.9	20.9	20.9	25.055	234	234	4.5	5	1		2	9	11	0	278.12	By MS/MS	By MS/MS	By MS/MS	1475400	1110600	1257300	1159400	841670	1534500	1284200	1010200	2073700	1875800	1475400	1110600	1257300
tr|A0A3Q1LK49|A0A3Q1LK49_BOVIN;tr|A5D7R6|A5D7R6_BOVIN;CON__Q9TRI1;sp|P56651|ITIH2_BOVIN	tr|A0A3Q1LK49|A0A3Q1LK49_BOVIN;tr|A5D7R6|A5D7R6_BOVIN;CON__Q9TRI1	30;30;30;1	30;30;30;1	30;30;30;1	>tr|A0A3Q1LK49|A0A3Q1LK49_BOVIN Inter-alpha-trypsin inhibitor heavy chain H2 OS=Bos taurus OX=9913 GN=ITIH2 PE=1 SV=1;>tr|A5D7R6|A5D7R6_BOVIN ITIH2 protein OS=Bos taurus OX=9913 GN=ITIH2 PE=1 SV=1;>Q9TRI1 TREMBL:Q9TRI1 (Bos taurus) similar to inter-alpha-t	4	30	30	30	24	26	26	24	26	26	24	26	26	30	30	30	96.774	864	864;946;946;50	3.54	33	27	47	15	45	32	0	323.31	By MS/MS	By MS/MS	By MS/MS	43772000	51703000	48506000	47619000	49394000	44071000	65616000	57549000	43272000	39207000	43772000	51703000	48506000
tr|A0A3Q1LKB0|A0A3Q1LKB0_BOVIN;tr|F1MNN7|F1MNN7_BOVIN;sp|Q2TBI0|LBP_BOVIN	tr|A0A3Q1LKB0|A0A3Q1LKB0_BOVIN;tr|F1MNN7|F1MNN7_BOVIN;sp|Q2TBI0|LBP_BOVIN	6;6;6	6;6;6	6;6;6	>tr|A0A3Q1LKB0|A0A3Q1LKB0_BOVIN Lipopolysaccharide-binding protein OS=Bos taurus OX=9913 GN=LBP PE=4 SV=1;>tr|F1MNN7|F1MNN7_BOVIN Lipopolysaccharide-binding protein OS=Bos taurus OX=9913 GN=LBP PE=4 SV=2;>sp|Q2TBI0|LBP_BOVIN Lipopolysaccharide-binding prot	3	6	6	6	4	3	3	4	3	3	4	3	3	17.4	17.4	17.4	53.313	476	476;481;481	2.82	2	4		4	1		0	53.149	By MS/MS	By MS/MS	By MS/MS	682440	772710	1107500	1439700	886780	749500	790800	928300	815590	781850	682440	772710	1107500
tr|A0A3Q1LKB9|A0A3Q1LKB9_BOVIN;sp|Q2KIG3|CBPB2_BOVIN;CON__Q2KIG3;tr|A0A3Q1NJ24|A0A3Q1NJ24_BOVIN;tr|A0A3Q1N1A7|A0A3Q1N1A7_BOVIN	tr|A0A3Q1LKB9|A0A3Q1LKB9_BOVIN;sp|Q2KIG3|CBPB2_BOVIN;CON__Q2KIG3;tr|A0A3Q1NJ24|A0A3Q1NJ24_BOVIN;tr|A0A3Q1N1A7|A0A3Q1N1A7_BOVIN	9;9;9;8;8	9;9;9;8;8	9;9;9;8;8	>tr|A0A3Q1LKB9|A0A3Q1LKB9_BOVIN Carboxypeptidase B2 OS=Bos taurus OX=9913 GN=CPB2 PE=4 SV=1;>sp|Q2KIG3|CBPB2_BOVIN Carboxypeptidase B2 OS=Bos taurus OX=9913 GN=CPB2 PE=1 SV=1;>Q2KIG3 TREMBL:Q2KIG3 (Bos taurus) Similar to carboxypeptidase B2;>tr|A0A3Q1NJ24|	5	9	9	9	5	7	6	5	7	6	5	7	6	25.4	25.4	25.4	44.247	386	386;423;423;354;388	3.45	2	5	4	4	1	4	0	134.72	By MS/MS	By MS/MS	By MS/MS	1474800	1445400	1700300	1255700	1528600	1717400	2301500	1511200	1223300	1600500	1474800	1445400	1700300
tr|A0A3Q1LL04|A0A3Q1LL04_BOVIN	tr|A0A3Q1LL04|A0A3Q1LL04_BOVIN	1	1	1	>tr|A0A3Q1LL04|A0A3Q1LL04_BOVIN Protein YIPF OS=Bos taurus OX=9913 GN=YIPF1 PE=3 SV=1	1	1	1	1	1	1	1	1	1	1	1	1	1	4.3	4.3	4.3	44.092	394	394	1.6	2	3					0.0073801	2.1681	By MS/MS	By MS/MS	By MS/MS	5525300	7285200	7450600	6400100	7905000	7047700	8209800	6941400	5614100	5879300	5525300	7285200	7450600
tr|A0A3Q1LN72|A0A3Q1LN72_BOVIN;tr|F1N458|F1N458_BOVIN;tr|A0A3Q1M1P3|A0A3Q1M1P3_BOVIN;tr|A0A3Q1LP77|A0A3Q1LP77_BOVIN;tr|A0A3Q1LLI7|A0A3Q1LLI7_BOVIN	tr|A0A3Q1LN72|A0A3Q1LN72_BOVIN;tr|F1N458|F1N458_BOVIN;tr|A0A3Q1M1P3|A0A3Q1M1P3_BOVIN;tr|A0A3Q1LP77|A0A3Q1LP77_BOVIN;tr|A0A3Q1LLI7|A0A3Q1LLI7_BOVIN	1;1;1;1;1	1;1;1;1;1	1;1;1;1;1	>tr|A0A3Q1LN72|A0A3Q1LN72_BOVIN Rho GTPase activating protein 17 OS=Bos taurus OX=9913 GN=ARHGAP17 PE=4 SV=1;>tr|F1N458|F1N458_BOVIN Rho GTPase activating protein 17 OS=Bos taurus OX=9913 GN=ARHGAP17 PE=4 SV=2;>tr|A0A3Q1M1P3|A0A3Q1M1P3_BOVIN Rho GTPase act	5	1	1	1	0	0	1	0	0	1	0	0	1	1.8	1.8	1.8	85.915	793	793;802;830;843;871	2		1					1	-2	By matching	By matching	By MS/MS	108780	128930	93808	92348	69001	42743	131640	149790	85496	116740	108780	128930	93808
tr|A0A3Q1LPF0|A0A3Q1LPF0_BOVIN;sp|Q03247|APOE_BOVIN;CON__Q03247;tr|A0A140T881|A0A140T881_BOVIN;tr|A0A3Q1MGI2|A0A3Q1MGI2_BOVIN	tr|A0A3Q1LPF0|A0A3Q1LPF0_BOVIN;sp|Q03247|APOE_BOVIN;CON__Q03247;tr|A0A140T881|A0A140T881_BOVIN;tr|A0A3Q1MGI2|A0A3Q1MGI2_BOVIN	12;12;12;12;10	12;12;12;12;10	12;12;12;12;10	>tr|A0A3Q1LPF0|A0A3Q1LPF0_BOVIN Apolipoprotein E OS=Bos taurus OX=9913 GN=APOE PE=3 SV=1;>sp|Q03247|APOE_BOVIN Apolipoprotein E OS=Bos taurus OX=9913 GN=APOE PE=1 SV=1;>Q03247 SWISS-PROT:Q03247 (Bos taurus) Apolipoprotein E precursor;>tr|A0A140T881|A0A140T	5	12	12	12	9	10	11	9	10	11	9	10	11	46.2	46.2	46.2	36.039	316	316;316;316;329;299	4	6	4	3	9	13	8	0	216.8	By MS/MS	By MS/MS	By MS/MS	2754700	3244300	3005800	2830800	3789200	3214800	3790000	2986900	2606700	3217800	2754700	3244300	3005800
tr|A0A3Q1LPG0|A0A3Q1LPG0_BOVIN	tr|A0A3Q1LPG0|A0A3Q1LPG0_BOVIN	20	15	15	>tr|A0A3Q1LPG0|A0A3Q1LPG0_BOVIN Uncharacterized protein OS=Bos taurus OX=9913 PE=1 SV=1	1	20	15	15	17	18	17	12	13	14	12	13	14	52.8	44.1	44.1	35.568	320	320	4.05	20	2	7	22	26	25	0	323.31	By MS/MS	By MS/MS	By MS/MS	13409000	13614000	12765000	12226000	13839000	16482000	27574000	8624700	11881000	18018000	13409000	13614000	12765000
tr|A0A3Q1LQ21|A0A3Q1LQ21_BOVIN;sp|P56652|ITIH3_BOVIN;CON__Q0V8M9	tr|A0A3Q1LQ21|A0A3Q1LQ21_BOVIN;sp|P56652|ITIH3_BOVIN;CON__Q0V8M9	18;18;18	18;18;18	18;18;18	>tr|A0A3Q1LQ21|A0A3Q1LQ21_BOVIN Inter-alpha-trypsin inhibitor heavy chain H3 OS=Bos taurus OX=9913 GN=ITIH3 PE=4 SV=1;>sp|P56652|ITIH3_BOVIN Inter-alpha-trypsin inhibitor heavy chain H3 OS=Bos taurus OX=9913 GN=ITIH3 PE=1 SV=2;>Q0V8M9 TREMBL:Q0V8M9;Q9TRI0	3	18	18	18	11	12	14	11	12	14	11	12	14	23.6	23.6	23.6	99.154	886	886;891;891	3.46	10	3	14	15	11	4	0	265.37	By MS/MS	By MS/MS	By MS/MS	3809200	3921300	3008800	3424600	2413500	3292400	4403500	5545500	4482000	3963600	3809200	3921300	3008800
tr|A0A3Q1LS74|A0A3Q1LS74_BOVIN;tr|A0A3Q1MP45|A0A3Q1MP45_BOVIN;tr|A0A3Q1LKA0|A0A3Q1LKA0_BOVIN;tr|A0A3Q1LT86|A0A3Q1LT86_BOVIN;tr|A0A3Q1N4H3|A0A3Q1N4H3_BOVIN	tr|A0A3Q1LS74|A0A3Q1LS74_BOVIN;tr|A0A3Q1MP45|A0A3Q1MP45_BOVIN	85;85;18;6;5	2;2;0;0;0	2;2;0;0;0	>tr|A0A3Q1LS74|A0A3Q1LS74_BOVIN Complement factor H OS=Bos taurus OX=9913 GN=CFH PE=4 SV=1;>tr|A0A3Q1MP45|A0A3Q1MP45_BOVIN Complement factor H OS=Bos taurus OX=9913 GN=CFH PE=4 SV=1	5	85	2	2	71	71	71	2	2	1	2	2	1	72.1	2.2	2.2	140.33	1236	1236;1240;380;216;232	1.71	2	5					0	65.22	By MS/MS	By MS/MS	By MS/MS	108410	142970	133170	82214	136370	106420	169300	142360	109290	108790	108410	142970	133170
tr|A0A3Q1LSC6|A0A3Q1LSC6_BOVIN	tr|A0A3Q1LSC6|A0A3Q1LSC6_BOVIN	6	5	5	>tr|A0A3Q1LSC6|A0A3Q1LSC6_BOVIN Uncharacterized protein OS=Bos taurus OX=9913 GN=LOC519737 PE=4 SV=1	1	6	5	5	3	4	6	3	3	5	3	3	5	18.3	15.1	15.1	31.948	278	278	2.07	3	8	4				0	39.063	By MS/MS	By MS/MS	By MS/MS	515520	379680	454170	673890	479100	470460	536070	567900	606210	547230	515520	379680	454170
tr|A0A3Q1LSN0|A0A3Q1LSN0_BOVIN;tr|F1MYX5|F1MYX5_BOVIN;sp|A7E3Q8|PLST_BOVIN;tr|F1MSB7|F1MSB7_BOVIN	tr|A0A3Q1LSN0|A0A3Q1LSN0_BOVIN;tr|F1MYX5|F1MYX5_BOVIN	3;3;1;1	3;3;1;1	3;3;1;1	>tr|A0A3Q1LSN0|A0A3Q1LSN0_BOVIN Lymphocyte cytosolic protein 1 OS=Bos taurus OX=9913 GN=LCP1 PE=1 SV=1;>tr|F1MYX5|F1MYX5_BOVIN Lymphocyte cytosolic protein 1 OS=Bos taurus OX=9913 GN=LCP1 PE=1 SV=2	4	3	3	3	2	3	2	2	3	2	2	3	2	7.3	7.3	7.3	70.111	627	627;631;630;639	4.86				4		3	0	12.661	By MS/MS	By MS/MS	By MS/MS	64541	69731	69043	53876	68182	53413	68306	59777	62149	71336	64541	69731	69043
tr|A0A3Q1LSP4|A0A3Q1LSP4_BOVIN;tr|F1MX87|F1MX87_BOVIN	tr|A0A3Q1LSP4|A0A3Q1LSP4_BOVIN;tr|F1MX87|F1MX87_BOVIN	24;24	24;24	24;24	>tr|A0A3Q1LSP4|A0A3Q1LSP4_BOVIN Complement C8 alpha chain OS=Bos taurus OX=9913 GN=C8A PE=4 SV=1;>tr|F1MX87|F1MX87_BOVIN Complement C8 alpha chain OS=Bos taurus OX=9913 GN=C8A PE=4 SV=1	2	24	24	24	17	18	20	17	18	20	17	18	20	53.4	53.4	53.4	65.498	582	582;589	3.37	18	13	17	32	14	9	0	323.31	By MS/MS	By MS/MS	By MS/MS	6240300	6374200	6713000	6667600	6491800	7132600	7487400	7650800	6247000	7742800	6240300	6374200	6713000
tr|A0A3Q1LSR2|A0A3Q1LSR2_BOVIN;tr|Q2TBQ1|Q2TBQ1_BOVIN;CON__Q2TBQ1;tr|A0A3Q1MWQ1|A0A3Q1MWQ1_BOVIN	tr|A0A3Q1LSR2|A0A3Q1LSR2_BOVIN;tr|Q2TBQ1|Q2TBQ1_BOVIN;CON__Q2TBQ1;tr|A0A3Q1MWQ1|A0A3Q1MWQ1_BOVIN	8;8;8;7	8;8;8;7	8;8;8;7	>tr|A0A3Q1LSR2|A0A3Q1LSR2_BOVIN Coagulation factor XIII B chain OS=Bos taurus OX=9913 GN=F13B PE=4 SV=1;>tr|Q2TBQ1|Q2TBQ1_BOVIN Coagulation factor XIII B chain OS=Bos taurus OX=9913 GN=F13B PE=2 SV=1;>Q2TBQ1 TREMBL:Q2TBQ1 (Bos taurus) Coagulation factor XI	4	8	8	8	8	2	5	8	2	5	8	2	5	15.3	15.3	15.3	68.308	601	601;661;661;602	3.25	4	2	3	7	4		0	28.732	By MS/MS	By MS/MS	By MS/MS	533710	545640	791010	404540	852160	481250	567510	697560	808940	580760	533710	545640	791010
tr|A0A3Q1LSV3|A0A3Q1LSV3_BOVIN;sp|A9QWQ1|CXL11_BOVIN	tr|A0A3Q1LSV3|A0A3Q1LSV3_BOVIN;sp|A9QWQ1|CXL11_BOVIN	1;1	1;1	1;1	>tr|A0A3Q1LSV3|A0A3Q1LSV3_BOVIN C-X-C motif chemokine OS=Bos taurus OX=9913 GN=CXCL11 PE=3 SV=1;>sp|A9QWQ1|CXL11_BOVIN C-X-C motif chemokine 11 OS=Bos taurus OX=9913 GN=CXCL11 PE=3 SV=1	2	1	1	1	1	1	0	1	1	0	1	1	0	12.5	12.5	12.5	10.301	96	96;100	2.67	2					1	0.0072727	1.9848	By MS/MS	By MS/MS	By matching	347500	287780	379510	283020	468310	474510	312420	432310	257550	613050	347500	287780	379510
tr|A0A3Q1LU84|A0A3Q1LU84_BOVIN;tr|F6QN80|F6QN80_BOVIN	tr|A0A3Q1LU84|A0A3Q1LU84_BOVIN;tr|F6QN80|F6QN80_BOVIN	10;10	10;10	10;10	>tr|A0A3Q1LU84|A0A3Q1LU84_BOVIN Uncharacterized protein OS=Bos taurus OX=9913 PE=4 SV=1;>tr|F6QN80|F6QN80_BOVIN Uncharacterized protein OS=Bos taurus OX=9913 PE=4 SV=1	2	10	10	10	7	7	9	7	7	9	7	7	9	59.5	59.5	59.5	14.998	131	131;132	2.88	9	15	9	9	6	2	0	323.31	By MS/MS	By MS/MS	By MS/MS	4514300	5822100	5217200	4279900	6602600	4520200	5224700	5323400	4913000	5406700	4514300	5822100	5217200
tr|A0A3Q1LWV8|A0A3Q1LWV8_BOVIN;tr|A0A3Q1LUE9|A0A3Q1LUE9_BOVIN;tr|G5E6I6|G5E6I6_BOVIN;tr|A0A3Q1LL87|A0A3Q1LL87_BOVIN;tr|A0A3Q1LP51|A0A3Q1LP51_BOVIN	tr|A0A3Q1LWV8|A0A3Q1LWV8_BOVIN;tr|A0A3Q1LUE9|A0A3Q1LUE9_BOVIN	5;5;1;1;1	3;3;0;0;0	2;2;0;0;0	>tr|A0A3Q1LWV8|A0A3Q1LWV8_BOVIN Uncharacterized protein OS=Bos taurus OX=9913 PE=1 SV=1;>tr|A0A3Q1LUE9|A0A3Q1LUE9_BOVIN Uncharacterized protein OS=Bos taurus OX=9913 PE=1 SV=1	5	5	3	2	5	5	4	3	3	3	2	2	2	32.7	25	19.2	16.433	156	156;159;106;125;126	2.98	13	13	3		1	12	0	277.8	By MS/MS	By MS/MS	By MS/MS	17905000	24140000	12904000	11080000	17160000	12156000	31099000	15031000	28210000	22409000	17905000	24140000	12904000
tr|A0A3Q1M119|A0A3Q1M119_BOVIN;sp|P62261|1433E_BOVIN;tr|A0A3Q1MP67|A0A3Q1MP67_BOVIN	tr|A0A3Q1M119|A0A3Q1M119_BOVIN;sp|P62261|1433E_BOVIN;tr|A0A3Q1MP67|A0A3Q1MP67_BOVIN	1;1;1	1;1;1	1;1;1	>tr|A0A3Q1M119|A0A3Q1M119_BOVIN 14-3-3 protein epsilon OS=Bos taurus OX=9913 GN=YWHAE PE=1 SV=1;>sp|P62261|1433E_BOVIN 14-3-3 protein epsilon OS=Bos taurus OX=9913 GN=YWHAE PE=2 SV=1;>tr|A0A3Q1MP67|A0A3Q1MP67_BOVIN 14-3-3 protein epsilon OS=Bos taurus OX=9	3	1	1	1	0	1	1	0	1	1	0	1	1	5	5	5	27.419	240	240;255;263	5					2		0.0037594	2.5079	By matching	By MS/MS	By matching	3122.6	4007.3	3476.1	3941.6	4834.4	2908.2	4405.4	4391.6	3734.4	5741	3122.6	4007.3	3476.1
tr|A0A3Q1M2N8|A0A3Q1M2N8_BOVIN	tr|A0A3Q1M2N8|A0A3Q1M2N8_BOVIN	1	1	1	>tr|A0A3Q1M2N8|A0A3Q1M2N8_BOVIN Adenosylhomocysteinase 3 OS=Bos taurus OX=9913 GN=AHCYL2 PE=4 SV=1	1	1	1	1	1	1	1	1	1	1	1	1	1	3.6	3.6	3.6	36.942	329	329	2.75		1	3				1	-2	By matching	By MS/MS	By MS/MS	608880	567090	632970	473270	713650	446230	1001900	672230	603730	454410	608880	567090	632970
tr|A0A3Q1M315|A0A3Q1M315_BOVIN	tr|A0A3Q1M315|A0A3Q1M315_BOVIN	14	8	3	>tr|A0A3Q1M315|A0A3Q1M315_BOVIN Uncharacterized protein OS=Bos taurus OX=9913 GN=LOC790886 PE=4 SV=1	1	14	8	3	10	10	11	5	6	6	3	2	2	27.4	17	5.8	45.377	394	394	4.2	1	4	1	2	8	4	0	83.815	By MS/MS	By MS/MS	By MS/MS	1371400	544490	2177600	806230	682300	1744200	1973100	3513900	3064400	1714900	1371400	544490	2177600
tr|A0A3Q1M3A8|A0A3Q1M3A8_BOVIN	tr|A0A3Q1M3A8|A0A3Q1M3A8_BOVIN	2	2	2	>tr|A0A3Q1M3A8|A0A3Q1M3A8_BOVIN Uncharacterized protein OS=Bos taurus OX=9913 PE=4 SV=1	1	2	2	2	2	2	2	2	2	2	2	2	2	8.1	8.1	8.1	19.222	186	186	3		3		3			0.0037736	2.6132	By MS/MS	By MS/MS	By MS/MS	299800	386810	225710	298820	187850	277790	355390	268310	286600	261920	299800	386810	225710
tr|A0A3Q1M3L6|A0A3Q1M3L6_BOVIN	tr|A0A3Q1M3L6|A0A3Q1M3L6_BOVIN	21	4	2	>tr|A0A3Q1M3L6|A0A3Q1M3L6_BOVIN Uncharacterized protein OS=Bos taurus OX=9913 PE=1 SV=1	1	21	4	2	21	16	16	4	3	2	2	1	1	55.9	13.1	9	40.475	367	367	1.92	19	13				4	0	149.71	By MS/MS	By MS/MS	By MS/MS	15504000	18722000	19019000	22087000	24488000	36938000	12949000	11773000	16597000	34372000	15504000	18722000	19019000
tr|A0A3Q1M4R3|A0A3Q1M4R3_BOVIN;sp|Q5E9B1|LDHB_BOVIN;tr|A0A3Q1M5R4|A0A3Q1M5R4_BOVIN	tr|A0A3Q1M4R3|A0A3Q1M4R3_BOVIN;sp|Q5E9B1|LDHB_BOVIN;tr|A0A3Q1M5R4|A0A3Q1M5R4_BOVIN	4;4;4	4;4;4	3;3;3	>tr|A0A3Q1M4R3|A0A3Q1M4R3_BOVIN L-lactate dehydrogenase OS=Bos taurus OX=9913 PE=3 SV=1;>sp|Q5E9B1|LDHB_BOVIN L-lactate dehydrogenase B chain OS=Bos taurus OX=9913 GN=LDHB PE=2 SV=4;>tr|A0A3Q1M5R4|A0A3Q1M5R4_BOVIN L-lactate dehydrogenase OS=Bos taurus OX=9	3	4	4	3	3	3	2	3	3	2	2	2	1	15.6	15.6	12	36.768	334	334;334;341	4.89			1	3	1	4	0	30.069	By MS/MS	By MS/MS	By MS/MS	293950	316210	329620	283620	324880	302570	344110	441850	229220	344580	293950	316210	329620
tr|A0A3Q1M5Q6|A0A3Q1M5Q6_BOVIN;tr|A0A3Q1MCW2|A0A3Q1MCW2_BOVIN;tr|A0A3S5ZPB5|A0A3S5ZPB5_BOVIN	tr|A0A3Q1M5Q6|A0A3Q1M5Q6_BOVIN;tr|A0A3Q1MCW2|A0A3Q1MCW2_BOVIN;tr|A0A3S5ZPB5|A0A3S5ZPB5_BOVIN	24;23;21	24;23;21	24;23;21	>tr|A0A3Q1M5Q6|A0A3Q1M5Q6_BOVIN Extracellular matrix protein 1 OS=Bos taurus OX=9913 GN=ECM1 PE=4 SV=1;>tr|A0A3Q1MCW2|A0A3Q1MCW2_BOVIN Extracellular matrix protein 1 OS=Bos taurus OX=9913 GN=ECM1 PE=4 SV=1;>tr|A0A3S5ZPB5|A0A3S5ZPB5_BOVIN Extracellular matr	3	24	24	24	19	14	16	19	14	16	19	14	16	39.9	39.9	39.9	63.177	569	569;543;524	3.76	2	11	12	34	8	7	0	323.31	By MS/MS	By MS/MS	By MS/MS	4095100	3402100	4264300	4711900	3328200	3888400	4281200	3813700	3774200	4057500	4095100	3402100	4264300
tr|A0A3Q1M6N7|A0A3Q1M6N7_BOVIN;sp|Q3SZH7|LKHA4_BOVIN	tr|A0A3Q1M6N7|A0A3Q1M6N7_BOVIN;sp|Q3SZH7|LKHA4_BOVIN	2;2	2;2	2;2	>tr|A0A3Q1M6N7|A0A3Q1M6N7_BOVIN Leukotriene A(4) hydrolase OS=Bos taurus OX=9913 GN=LTA4H PE=3 SV=1;>sp|Q3SZH7|LKHA4_BOVIN Leukotriene A-4 hydrolase OS=Bos taurus OX=9913 GN=LTA4H PE=2 SV=3	2	2	2	2	2	1	0	2	1	0	2	1	0	4.1	4.1	4.1	67.282	592	592;611	3.33		2				1	0.0037175	2.2709	By MS/MS	By MS/MS	By matching	56168	50468	57462	59178	62584	61244	61373	61390	67324	59527	56168	50468	57462
tr|A0A3Q1M8I5|A0A3Q1M8I5_BOVIN;tr|A0A3Q1NGH3|A0A3Q1NGH3_BOVIN;tr|F1MI18|F1MI18_BOVIN;tr|A0A3Q1MCP0|A0A3Q1MCP0_BOVIN	tr|A0A3Q1M8I5|A0A3Q1M8I5_BOVIN;tr|A0A3Q1NGH3|A0A3Q1NGH3_BOVIN;tr|F1MI18|F1MI18_BOVIN;tr|A0A3Q1MCP0|A0A3Q1MCP0_BOVIN	50;50;48;47	2;2;2;2	0;0;0;0	>tr|A0A3Q1M8I5|A0A3Q1M8I5_BOVIN Uncharacterized protein OS=Bos taurus OX=9913 GN=LOC506828 PE=4 SV=1;>tr|A0A3Q1NGH3|A0A3Q1NGH3_BOVIN Uncharacterized protein OS=Bos taurus OX=9913 GN=LOC506828 PE=4 SV=1;>tr|F1MI18|F1MI18_BOVIN Uncharacterized protein OS=Bos	4	50	2	0	41	49	28	1	2	2	0	0	0	38.2	3.1	0	159.76	1433	1433;1452;1433;1373	3.14		5				2	0	28.13	By MS/MS	By MS/MS	By MS/MS	2225700	1882700	1239200	1957700	1599800	908670	4320500	2435100	1613000	2503700	2225700	1882700	1239200
tr|A0A3Q1MA31|A0A3Q1MA31_BOVIN	tr|A0A3Q1MA31|A0A3Q1MA31_BOVIN	42	1	1	>tr|A0A3Q1MA31|A0A3Q1MA31_BOVIN Inter-alpha-trypsin inhibitor heavy chain H4 OS=Bos taurus OX=9913 GN=ITIH4 PE=4 SV=1	1	42	1	1	40	39	36	1	1	1	1	1	1	45.5	0.9	0.9	99.645	899	899	2		4					1	-2	By MS/MS	By MS/MS	By MS/MS	7312400	4299500	7158000	8262300	5331400	5432600	7194300	8169300	8775300	8047000	7312400	4299500	7158000
tr|A0A3Q1MAM9|A0A3Q1MAM9_BOVIN;tr|F1MS95|F1MS95_BOVIN	tr|A0A3Q1MAM9|A0A3Q1MAM9_BOVIN;tr|F1MS95|F1MS95_BOVIN	1;1	1;1	1;1	>tr|A0A3Q1MAM9|A0A3Q1MAM9_BOVIN TBC1 domain family member 9 OS=Bos taurus OX=9913 GN=TBC1D9 PE=4 SV=1;>tr|F1MS95|F1MS95_BOVIN TBC1 domain family member 9 OS=Bos taurus OX=9913 GN=TBC1D9 PE=4 SV=3	2	1	1	1	1	1	1	1	1	1	1	1	1	0.6	0.6	0.6	140.46	1242	1242;1267	5					3		1	-2	By MS/MS	By matching	By matching	41413	24569	32559	28387	25735	27781	37732	52458	17628	26036	41413	24569	32559
tr|A0A3Q1MB98|A0A3Q1MB98_BOVIN;sp|Q2TBU0|HPT_BOVIN;tr|G3X6K8|G3X6K8_BOVIN	tr|A0A3Q1MB98|A0A3Q1MB98_BOVIN;sp|Q2TBU0|HPT_BOVIN;tr|G3X6K8|G3X6K8_BOVIN	38;38;32	38;38;32	38;38;32	>tr|A0A3Q1MB98|A0A3Q1MB98_BOVIN Haptoglobin OS=Bos taurus OX=9913 GN=HP PE=3 SV=1;>sp|Q2TBU0|HPT_BOVIN Haptoglobin OS=Bos taurus OX=9913 GN=HP PE=2 SV=1;>tr|G3X6K8|G3X6K8_BOVIN Haptoglobin OS=Bos taurus OX=9913 GN=HP PE=3 SV=2	3	38	38	38	37	31	26	37	31	26	37	31	26	85.4	85.4	85.4	43.771	390	390;401;376	3.39	52	41	49	26	47	42	0	323.31	By MS/MS	By MS/MS	By MS/MS	65141000	12005000	52216000	174000000	24791000	22437000	21896000	115340000	207750000	121020000	65141000	12005000	52216000
tr|A0A3Q1MBE1|A0A3Q1MBE1_BOVIN;sp|P04815|BPT2_BOVIN;tr|A0A3Q1M0F4|A0A3Q1M0F4_BOVIN;tr|A6QPK7|A6QPK7_BOVIN;sp|P00974|BPT1_BOVIN;tr|A0A3Q1LPM0|A0A3Q1LPM0_BOVIN	tr|A0A3Q1MBE1|A0A3Q1MBE1_BOVIN;sp|P04815|BPT2_BOVIN;tr|A0A3Q1M0F4|A0A3Q1M0F4_BOVIN;tr|A6QPK7|A6QPK7_BOVIN;sp|P00974|BPT1_BOVIN;tr|A0A3Q1LPM0|A0A3Q1LPM0_BOVIN	2;2;2;1;1;1	2;2;2;1;1;1	2;2;2;1;1;1	>tr|A0A3Q1MBE1|A0A3Q1MBE1_BOVIN Uncharacterized protein OS=Bos taurus OX=9913 GN=LOC404103 PE=4 SV=1;>sp|P04815|BPT2_BOVIN Spleen trypsin inhibitor I OS=Bos taurus OX=9913 PE=1 SV=2;>tr|A0A3Q1M0F4|A0A3Q1M0F4_BOVIN Uncharacterized protein OS=Bos taurus OX=9	6	2	2	2	2	1	0	2	1	0	2	1	0	26	26	26	10.825	100	100;100;143;100;100;110	4.8				1	4		0	38.559	By MS/MS	By MS/MS	By matching	186410	682550	97841	164400	130310	129260	149780	330420	257510	172760	186410	682550	97841
tr|A0A3Q1MBT3|A0A3Q1MBT3_BOVIN;tr|A0A3Q1MIT3|A0A3Q1MIT3_BOVIN;tr|A0A3Q1MKI2|A0A3Q1MKI2_BOVIN;tr|A0A3Q1MT50|A0A3Q1MT50_BOVIN;tr|A0A3Q1LFV7|A0A3Q1LFV7_BOVIN	tr|A0A3Q1MBT3|A0A3Q1MBT3_BOVIN;tr|A0A3Q1MIT3|A0A3Q1MIT3_BOVIN;tr|A0A3Q1MKI2|A0A3Q1MKI2_BOVIN;tr|A0A3Q1MT50|A0A3Q1MT50_BOVIN;tr|A0A3Q1LFV7|A0A3Q1LFV7_BOVIN	5;5;5;5;4	1;1;1;1;0	1;1;1;1;0	>tr|A0A3Q1MBT3|A0A3Q1MBT3_BOVIN Uncharacterized protein OS=Bos taurus OX=9913 PE=4 SV=1;>tr|A0A3Q1MIT3|A0A3Q1MIT3_BOVIN Uncharacterized protein OS=Bos taurus OX=9913 PE=4 SV=1;>tr|A0A3Q1MKI2|A0A3Q1MKI2_BOVIN Uncharacterized protein OS=Bos taurus OX=9913 PE	5	5	1	1	5	4	2	1	1	0	1	1	0	42	24.4	24.4	12.42	119	119;147;176;231;134	2.4		3	2				0	109.32	By MS/MS	By MS/MS	By matching	119440	55478	67224	111420	83697	74701	97560	105420	315940	112190	119440	55478	67224
tr|A0A3Q1MEH0|A0A3Q1MEH0_BOVIN;tr|Q56K11|Q56K11_BOVIN	tr|A0A3Q1MEH0|A0A3Q1MEH0_BOVIN;tr|Q56K11|Q56K11_BOVIN	1;1	1;1	1;1	>tr|A0A3Q1MEH0|A0A3Q1MEH0_BOVIN Serglycin OS=Bos taurus OX=9913 GN=SRGN PE=4 SV=1;>tr|Q56K11|Q56K11_BOVIN Proteoglycan 1-like OS=Bos taurus OX=9913 GN=SRGN PE=2 SV=1	2	1	1	1	0	0	1	0	0	1	0	0	1	14.8	14.8	14.8	15.929	142	142;150	2		1					0	5.0693	By matching	By matching	By MS/MS	3715.4	1583.4	4084.4	7560.8	2539.7	3451.8	7998	3836.6	2272.1	2148.4	3715.4	1583.4	4084.4
tr|A0A3Q1MFI7|A0A3Q1MFI7_BOVIN;tr|A0A3Q1MIL5|A0A3Q1MIL5_BOVIN;tr|A0A3Q1M0K3|A0A3Q1M0K3_BOVIN	tr|A0A3Q1MFI7|A0A3Q1MFI7_BOVIN;tr|A0A3Q1MIL5|A0A3Q1MIL5_BOVIN;tr|A0A3Q1M0K3|A0A3Q1M0K3_BOVIN	7;5;5	4;2;2	2;0;0	>tr|A0A3Q1MFI7|A0A3Q1MFI7_BOVIN Uncharacterized protein OS=Bos taurus OX=9913 GN=LOC104968484 PE=4 SV=1;>tr|A0A3Q1MIL5|A0A3Q1MIL5_BOVIN Uncharacterized protein OS=Bos taurus OX=9913 PE=4 SV=1;>tr|A0A3Q1M0K3|A0A3Q1M0K3_BOVIN Uncharacterized protein OS=Bos t	3	7	4	2	4	5	5	2	3	2	1	2	0	39	35.9	24.2	23.733	223	223;216;220	3.13	6		2		7		0	323.31	By MS/MS	By MS/MS	By MS/MS	1550400	1574100	1356700	1728500	1411300	2068900	1721900	1660300	1911500	1724600	1550400	1574100	1356700
tr|A0A3Q1MG08|A0A3Q1MG08_BOVIN	tr|A0A3Q1MG08|A0A3Q1MG08_BOVIN	2	2	2	>tr|A0A3Q1MG08|A0A3Q1MG08_BOVIN Mannan binding lectin serine peptidase 1 OS=Bos taurus OX=9913 GN=MASP1 PE=3 SV=1	1	2	2	2	1	2	0	1	2	0	1	2	0	3.4	3.4	3.4	79.099	699	699	2.67	2					1	0	8.3634	By MS/MS	By MS/MS	By matching	60998	51048	59819	57941	60507	58447	63790	46461	68478	54434	60998	51048	59819
tr|A0A3Q1MGL5|A0A3Q1MGL5_BOVIN;tr|A0A3Q1N0C4|A0A3Q1N0C4_BOVIN;tr|A0A3Q1N1A8|A0A3Q1N1A8_BOVIN;tr|A0A3Q1MA45|A0A3Q1MA45_BOVIN;tr|A0A3Q1LWD3|A0A3Q1LWD3_BOVIN;tr|A0A3Q1MI76|A0A3Q1MI76_BOVIN	tr|A0A3Q1MGL5|A0A3Q1MGL5_BOVIN;tr|A0A3Q1N0C4|A0A3Q1N0C4_BOVIN;tr|A0A3Q1N1A8|A0A3Q1N1A8_BOVIN;tr|A0A3Q1MA45|A0A3Q1MA45_BOVIN;tr|A0A3Q1LWD3|A0A3Q1LWD3_BOVIN;tr|A0A3Q1MI76|A0A3Q1MI76_BOVIN	2;2;2;2;1;1	2;2;2;2;1;1	2;2;2;2;1;1	>tr|A0A3Q1MGL5|A0A3Q1MGL5_BOVIN Uncharacterized protein OS=Bos taurus OX=9913 PE=4 SV=1;>tr|A0A3Q1N0C4|A0A3Q1N0C4_BOVIN Uncharacterized protein OS=Bos taurus OX=9913 PE=4 SV=1;>tr|A0A3Q1N1A8|A0A3Q1N1A8_BOVIN Uncharacterized protein OS=Bos taurus OX=9913 PE	6	2	2	2	0	2	1	0	2	1	0	2	1	27.5	27.5	27.5	35.988	338	338;357;361;433;357;364	4.67		2				4	0	124.84	By matching	By MS/MS	By MS/MS	105330	91093	126580	113010	108820	95313	146880	75713	92138	112590	105330	91093	126580
tr|A0A3Q1MHU8|A0A3Q1MHU8_BOVIN;tr|Q17QC8|Q17QC8_BOVIN;tr|A0A3Q1M2R9|A0A3Q1M2R9_BOVIN	tr|A0A3Q1MHU8|A0A3Q1MHU8_BOVIN;tr|Q17QC8|Q17QC8_BOVIN;tr|A0A3Q1M2R9|A0A3Q1M2R9_BOVIN	7;7;7	7;7;7	7;7;7	>tr|A0A3Q1MHU8|A0A3Q1MHU8_BOVIN Complement factor properdin OS=Bos taurus OX=9913 GN=CFP PE=4 SV=1;>tr|Q17QC8|Q17QC8_BOVIN Complement factor properdin OS=Bos taurus OX=9913 GN=CFP PE=2 SV=1;>tr|A0A3Q1M2R9|A0A3Q1M2R9_BOVIN Complement factor properdin OS=Bos	3	7	7	7	7	7	6	7	7	6	7	7	6	27.1	27.1	27.1	49.544	451	451;464;573	2.53	19	9	8	11		4	0	292.04	By MS/MS	By MS/MS	By MS/MS	1324100	1224900	1383400	1247500	1504800	1266500	2114500	1497500	1290300	1399100	1324100	1224900	1383400
tr|A0A3Q1MI29|A0A3Q1MI29_BOVIN	tr|A0A3Q1MI29|A0A3Q1MI29_BOVIN	4	1	1	>tr|A0A3Q1MI29|A0A3Q1MI29_BOVIN Uncharacterized protein OS=Bos taurus OX=9913 PE=4 SV=1	1	4	1	1	2	3	4	0	1	1	0	1	1	18.6	10	10	23.239	220	220	4				2			0	36.788	By matching	By MS/MS	By matching	9815.6	5438.4	6736.5	7688.1	10639	9241.6	11367	5950.8	7170.9	4111.2	9815.6	5438.4	6736.5
tr|A0A3Q1MIF4|A0A3Q1MIF4_BOVIN;tr|A0A3Q1MF14|A0A3Q1MF14_BOVIN;CON__Q32PI4;tr|A0A3Q1LGM4|A0A3Q1LGM4_BOVIN;tr|A0A3Q1N461|A0A3Q1N461_BOVIN;tr|F1N4M7|F1N4M7_BOVIN;tr|A0A3Q1M2A8|A0A3Q1M2A8_BOVIN	tr|A0A3Q1MIF4|A0A3Q1MIF4_BOVIN;tr|A0A3Q1MF14|A0A3Q1MF14_BOVIN;CON__Q32PI4;tr|A0A3Q1LGM4|A0A3Q1LGM4_BOVIN;tr|A0A3Q1N461|A0A3Q1N461_BOVIN;tr|F1N4M7|F1N4M7_BOVIN;tr|A0A3Q1M2A8|A0A3Q1M2A8_BOVIN	35;35;35;33;32;32;30	35;35;35;33;32;32;30	35;35;35;33;32;32;30	>tr|A0A3Q1MIF4|A0A3Q1MIF4_BOVIN Complement factor I OS=Bos taurus OX=9913 GN=CFI PE=1 SV=1;>tr|A0A3Q1MF14|A0A3Q1MF14_BOVIN Complement factor I OS=Bos taurus OX=9913 GN=CFI PE=1 SV=1;>Q32PI4 TREMBL:Q32PI4 (Bos taurus) Similar to complement factor I;>tr|A0A3	7	35	35	35	29	30	31	29	30	31	29	30	31	54.5	54.5	54.5	67.044	602	602;618;618;583;594;610;581	3.15	31	61	13	12	37	21	0	323.31	By MS/MS	By MS/MS	By MS/MS	22209000	24397000	24568000	21793000	24112000	22960000	26689000	28881000	21753000	24184000	22209000	24397000	24568000
tr|A0A3Q1MIN7|A0A3Q1MIN7_BOVIN;tr|A0A3Q1MQ22|A0A3Q1MQ22_BOVIN	tr|A0A3Q1MIN7|A0A3Q1MIN7_BOVIN;tr|A0A3Q1MQ22|A0A3Q1MQ22_BOVIN	5;4	1;0	1;0	>tr|A0A3Q1MIN7|A0A3Q1MIN7_BOVIN Uncharacterized protein OS=Bos taurus OX=9913 PE=4 SV=1;>tr|A0A3Q1MQ22|A0A3Q1MQ22_BOVIN Uncharacterized protein OS=Bos taurus OX=9913 PE=4 SV=1	2	5	1	1	5	5	5	1	1	1	1	1	1	26.2	15.2	15.2	20.034	191	191;163	2.2		4	1				0	109.01	By MS/MS	By MS/MS	By MS/MS	84629	70722	86410	106940	91999	89991	85039	122760	134390	107930	84629	70722	86410
tr|A0A3Q1MJY6|A0A3Q1MJY6_BOVIN;tr|E1B7T1|E1B7T1_BOVIN;tr|A0A3Q1MZP2|A0A3Q1MZP2_BOVIN	tr|A0A3Q1MJY6|A0A3Q1MJY6_BOVIN;tr|E1B7T1|E1B7T1_BOVIN;tr|A0A3Q1MZP2|A0A3Q1MZP2_BOVIN	1;1;1	1;1;1	1;1;1	>tr|A0A3Q1MJY6|A0A3Q1MJY6_BOVIN Filamin A interacting protein 1 OS=Bos taurus OX=9913 GN=FILIP1 PE=4 SV=1;>tr|E1B7T1|E1B7T1_BOVIN Filamin A interacting protein 1 OS=Bos taurus OX=9913 GN=FILIP1 PE=4 SV=2;>tr|A0A3Q1MZP2|A0A3Q1MZP2_BOVIN Filamin A interactin	3	1	1	1	1	0	0	1	0	0	1	0	0	0.6	0.6	0.6	134.41	1177	1177;1213;1224	5					1		1	-2	By MS/MS	By matching	By matching	83306	75372	72052	67899	84121	79108	90832	92547	73965	87138	83306	75372	72052
tr|A0A3Q1ML26|A0A3Q1ML26_BOVIN	tr|A0A3Q1ML26|A0A3Q1ML26_BOVIN	6	1	1	>tr|A0A3Q1ML26|A0A3Q1ML26_BOVIN Uncharacterized protein OS=Bos taurus OX=9913 PE=4 SV=1	1	6	1	1	4	4	5	1	1	0	1	1	0	30.1	15.1	15.1	23.305	219	219	3			2				0	139.94	By matching	By MS/MS	By matching	40268	23517	46041	37193	61560	48605	25423	26426	26557	54320	40268	23517	46041
tr|A0A3Q1MNN6|A0A3Q1MNN6_BOVIN;tr|A0A3Q1M2P2|A0A3Q1M2P2_BOVIN	tr|A0A3Q1MNN6|A0A3Q1MNN6_BOVIN;tr|A0A3Q1M2P2|A0A3Q1M2P2_BOVIN	50;44	2;0	2;0	>tr|A0A3Q1MNN6|A0A3Q1MNN6_BOVIN Uncharacterized protein OS=Bos taurus OX=9913 GN=LOC506828 PE=4 SV=1;>tr|A0A3Q1M2P2|A0A3Q1M2P2_BOVIN Uncharacterized protein OS=Bos taurus OX=9913 GN=LOC506828 PE=4 SV=1	2	50	2	2	40	49	27	1	2	0	1	2	0	38	2.4	2.4	159.84	1430	1430;1386	3.2			4	1			0	41.697	By MS/MS	By MS/MS	By matching	724770	886410	731880	644940	996810	919140	914700	984430	776720	618780	724770	886410	731880
tr|A0A3Q1MP40|A0A3Q1MP40_BOVIN;tr|A0A3Q1LI40|A0A3Q1LI40_BOVIN;tr|F1N045|F1N045_BOVIN	tr|A0A3Q1MP40|A0A3Q1MP40_BOVIN;tr|A0A3Q1LI40|A0A3Q1LI40_BOVIN;tr|F1N045|F1N045_BOVIN	37;37;35	37;37;35	2;2;2	>tr|A0A3Q1MP40|A0A3Q1MP40_BOVIN Complement component C7 OS=Bos taurus OX=9913 GN=C7 PE=4 SV=1;>tr|A0A3Q1LI40|A0A3Q1LI40_BOVIN Complement component C7 OS=Bos taurus OX=9913 GN=C7 PE=4 SV=1;>tr|F1N045|F1N045_BOVIN Complement component C7 OS=Bos taurus OX=991	3	37	37	2	30	28	31	30	28	31	2	1	2	50.2	50.2	4.7	90.092	816	816;843;779	2.99	38	29	28	13	12	22	0	323.31	By MS/MS	By MS/MS	By MS/MS	12506000	14106000	13149000	10111000	12928000	13938000	16166000	13770000	12025000	13919000	12506000	14106000	13149000
tr|A0A3Q1MPM3|A0A3Q1MPM3_BOVIN	tr|A0A3Q1MPM3|A0A3Q1MPM3_BOVIN	1	1	1	>tr|A0A3Q1MPM3|A0A3Q1MPM3_BOVIN Uncharacterized protein OS=Bos taurus OX=9913 PE=4 SV=1	1	1	1	1	1	1	1	1	1	1	1	1	1	13.8	13.8	13.8	11.066	94	94	5				1	5	1	1	-2	By MS/MS	By matching	By MS/MS	7635400	3848000	5872800	12758000	2387900	5128700	2441300	5720100	6283600	7060100	7635400	3848000	5872800
tr|A0A3Q1MR54|A0A3Q1MR54_BOVIN;tr|A0A3Q1NH68|A0A3Q1NH68_BOVIN;tr|A0A3Q1MSP1|A0A3Q1MSP1_BOVIN	tr|A0A3Q1MR54|A0A3Q1MR54_BOVIN;tr|A0A3Q1NH68|A0A3Q1NH68_BOVIN	5;5;2	3;3;0	0;0;0	>tr|A0A3Q1MR54|A0A3Q1MR54_BOVIN Uncharacterized protein OS=Bos taurus OX=9913 GN=C8G PE=4 SV=1;>tr|A0A3Q1NH68|A0A3Q1NH68_BOVIN Uncharacterized protein OS=Bos taurus OX=9913 GN=C8G PE=4 SV=1	3	5	3	0	2	4	5	1	3	3	0	0	0	19.6	11.7	0	30.533	281	281;327;287	2	6	1	2	2			0	323.31	By MS/MS	By MS/MS	By MS/MS	1795200	1905300	2079500	2598100	2342300	2266800	2884900	2466000	1947000	2106400	1795200	1905300	2079500
tr|A0A3Q1MRQ2|A0A3Q1MRQ2_BOVIN	tr|A0A3Q1MRQ2|A0A3Q1MRQ2_BOVIN	6	6	0	>tr|A0A3Q1MRQ2|A0A3Q1MRQ2_BOVIN Uncharacterized protein OS=Bos taurus OX=9913 GN=C8G PE=3 SV=1	1	6	6	0	4	4	4	4	4	4	0	0	0	18.9	18.9	0	41.218	387	387	2.86	1	13	2		6		0	62.834	By MS/MS	By MS/MS	By MS/MS	1842200	1715100	1812300	1800400	1816800	1780300	2324100	2150200	1745600	2014300	1842200	1715100	1812300
tr|A0A3Q1MS75|A0A3Q1MS75_BOVIN	tr|A0A3Q1MS75|A0A3Q1MS75_BOVIN	2	2	2	>tr|A0A3Q1MS75|A0A3Q1MS75_BOVIN Uncharacterized protein OS=Bos taurus OX=9913 PE=4 SV=1	1	2	2	2	2	2	2	2	2	2	2	2	2	8.7	8.7	8.7	15.535	149	149	3.4	3			4	3		0	5.9705	By MS/MS	By MS/MS	By matching	407750	1339700	766620	438120	367440	827130	322810	288190	209960	260390	407750	1339700	766620
tr|A0A3Q1MSF6|A0A3Q1MSF6_BOVIN;tr|A0A3Q1MNY1|A0A3Q1MNY1_BOVIN	tr|A0A3Q1MSF6|A0A3Q1MSF6_BOVIN;tr|A0A3Q1MNY1|A0A3Q1MNY1_BOVIN	6;5	2;1	1;1	>tr|A0A3Q1MSF6|A0A3Q1MSF6_BOVIN Uncharacterized protein OS=Bos taurus OX=9913 PE=4 SV=1;>tr|A0A3Q1MNY1|A0A3Q1MNY1_BOVIN Uncharacterized protein OS=Bos taurus OX=9913 PE=4 SV=1	2	6	2	1	6	6	5	2	2	1	1	1	0	65	44.7	28.2	10.566	103	103;131	2.94	8	3				6	0	126.38	By MS/MS	By MS/MS	By MS/MS	824160	983420	921710	681870	758950	864340	925620	1151100	1000800	1296800	824160	983420	921710
tr|A0A3Q1MUR2|A0A3Q1MUR2_BOVIN;tr|A0A3Q1M667|A0A3Q1M667_BOVIN	tr|A0A3Q1MUR2|A0A3Q1MUR2_BOVIN;tr|A0A3Q1M667|A0A3Q1M667_BOVIN	5;5	2;2	2;2	>tr|A0A3Q1MUR2|A0A3Q1MUR2_BOVIN Uncharacterized protein OS=Bos taurus OX=9913 PE=4 SV=1;>tr|A0A3Q1M667|A0A3Q1M667_BOVIN Uncharacterized protein OS=Bos taurus OX=9913 PE=4 SV=1	2	5	2	2	3	4	4	1	2	1	1	2	1	30	25	25	23.166	220	220;242	3.8			3		2		0	124.93	By MS/MS	By MS/MS	By matching	66077	65574	81893	78623	92252	79269	151700	189450	95845	69905	66077	65574	81893
tr|A0A3Q1MUU9|A0A3Q1MUU9_BOVIN	tr|A0A3Q1MUU9|A0A3Q1MUU9_BOVIN	1	1	1	>tr|A0A3Q1MUU9|A0A3Q1MUU9_BOVIN T-complex protein 1 subunit eta OS=Bos taurus OX=9913 GN=CCT7 PE=3 SV=1	1	1	1	1	1	0	1	1	0	1	1	0	1	1.3	1.3	1.3	59.195	540	540	5					2		1	-2	By MS/MS	By matching	By MS/MS	180170	136730	268840	317760	290340	197040	167560	442760	331850	445960	180170	136730	268840
tr|A0A3Q1MV99|A0A3Q1MV99_BOVIN;tr|A0A3Q1MIP8|A0A3Q1MIP8_BOVIN;tr|A0A3Q1LIH2|A0A3Q1LIH2_BOVIN;tr|F1N746|F1N746_BOVIN	tr|A0A3Q1MV99|A0A3Q1MV99_BOVIN;tr|A0A3Q1MIP8|A0A3Q1MIP8_BOVIN;tr|A0A3Q1LIH2|A0A3Q1LIH2_BOVIN;tr|F1N746|F1N746_BOVIN	1;1;1;1	1;1;1;1	1;1;1;1	>tr|A0A3Q1MV99|A0A3Q1MV99_BOVIN Uncharacterized protein OS=Bos taurus OX=9913 GN=RABGAP1 PE=4 SV=1;>tr|A0A3Q1MIP8|A0A3Q1MIP8_BOVIN Uncharacterized protein OS=Bos taurus OX=9913 GN=RABGAP1 PE=4 SV=1;>tr|A0A3Q1LIH2|A0A3Q1LIH2_BOVIN Uncharacterized protein OS	4	1	1	1	1	1	1	1	1	1	1	1	1	0.7	0.7	0.7	114.39	1001	1001;1032;1041;1069	4.09	3	1		1		6	0.0072993	2.0018	By MS/MS	By MS/MS	By MS/MS	38676000	111520000	101320000	26227000	74393000	72828000	68460000	11527000	14610000	13563000	38676000	111520000	101320000
tr|A0A3Q1MZD4|A0A3Q1MZD4_BOVIN;tr|A0A3Q1MRM7|A0A3Q1MRM7_BOVIN;sp|Q29RL0|TBC31_BOVIN	tr|A0A3Q1MZD4|A0A3Q1MZD4_BOVIN;tr|A0A3Q1MRM7|A0A3Q1MRM7_BOVIN;sp|Q29RL0|TBC31_BOVIN	2;1;1	2;1;1	2;1;1	>tr|A0A3Q1MZD4|A0A3Q1MZD4_BOVIN TBC1 domain family member 31 OS=Bos taurus OX=9913 GN=TBC1D31 PE=4 SV=1;>tr|A0A3Q1MRM7|A0A3Q1MRM7_BOVIN TBC1 domain family member 31 OS=Bos taurus OX=9913 GN=TBC1D31 PE=4 SV=1;>sp|Q29RL0|TBC31_BOVIN TBC1 domain family member	3	2	2	2	2	1	2	2	1	2	2	1	2	1.4	1.4	1.4	120.49	1032	1032;1037;1063	2.8		2	2	1			0	4.6232	By MS/MS	By MS/MS	By MS/MS	636090	181970	534900	1712300	71948	273360	457190	295690	189110	726480	636090	181970	534900
tr|A0A3Q1N2B9|A0A3Q1N2B9_BOVIN	tr|A0A3Q1N2B9|A0A3Q1N2B9_BOVIN	5	1	1	>tr|A0A3Q1N2B9|A0A3Q1N2B9_BOVIN Uncharacterized protein OS=Bos taurus OX=9913 PE=4 SV=1	1	5	1	1	5	5	3	1	1	0	1	1	0	47.6	21	21	15.055	143	143	3			4				0	98.532	By MS/MS	By MS/MS	By matching	60391	39226	43446	59470	47648	46356	57662	69921	108740	70208	60391	39226	43446
tr|A0A3Q1N414|A0A3Q1N414_BOVIN;tr|E1BF84|E1BF84_BOVIN;tr|G3MWQ8|G3MWQ8_BOVIN	tr|A0A3Q1N414|A0A3Q1N414_BOVIN;tr|E1BF84|E1BF84_BOVIN;tr|G3MWQ8|G3MWQ8_BOVIN	1;1;1	1;1;1	1;1;1	>tr|A0A3Q1N414|A0A3Q1N414_BOVIN Cadherin like and PC-esterase domain containing 1 OS=Bos taurus OX=9913 GN=CPED1 PE=4 SV=1;>tr|E1BF84|E1BF84_BOVIN Cadherin like and PC-esterase domain containing 1 OS=Bos taurus OX=9913 GN=CPED1 PE=4 SV=3;>tr|G3MWQ8|G3MWQ8_	3	1	1	1	0	0	1	0	0	1	0	0	1	1	1	1	114.02	998	998;1016;1033	5					1		1	-2	By matching	By matching	By MS/MS	10614	1849.3	5133.4	3326.3	2108.9	4430.2	7863.3	17293	5325.4	86989	10614	1849.3	5133.4
tr|A0A3Q1NEQ0|A0A3Q1NEQ0_BOVIN;tr|E1BI82|E1BI82_BOVIN;tr|A0A3Q1MUV9|A0A3Q1MUV9_BOVIN	tr|A0A3Q1NEQ0|A0A3Q1NEQ0_BOVIN;tr|E1BI82|E1BI82_BOVIN;tr|A0A3Q1MUV9|A0A3Q1MUV9_BOVIN	28;25;24	25;22;21	4;1;1	>tr|A0A3Q1NEQ0|A0A3Q1NEQ0_BOVIN Uncharacterized protein OS=Bos taurus OX=9913 GN=LOC525947 PE=1 SV=1;>tr|E1BI82|E1BI82_BOVIN Uncharacterized protein OS=Bos taurus OX=9913 GN=LOC525947 PE=1 SV=3;>tr|A0A3Q1MUV9|A0A3Q1MUV9_BOVIN Uncharacterized protein OS=Bos	3	28	25	4	22	27	22	19	24	19	3	4	3	44.7	41.8	8.4	77.749	703	703;622;650	2.95	33	14	10	20	11	11	0	323.31	By MS/MS	By MS/MS	By MS/MS	5720000	6917400	5653300	6186200	6081300	6976500	5931600	7723400	5912200	5620000	5720000	6917400	5653300
tr|A0A3Q1NG06|A0A3Q1NG06_BOVIN;tr|F6Q234|F6Q234_BOVIN;tr|A0A3Q1NGC5|A0A3Q1NGC5_BOVIN	tr|A0A3Q1NG06|A0A3Q1NG06_BOVIN;tr|F6Q234|F6Q234_BOVIN;tr|A0A3Q1NGC5|A0A3Q1NGC5_BOVIN	2;2;2	2;2;2	2;2;2	>tr|A0A3Q1NG06|A0A3Q1NG06_BOVIN Peptidase D OS=Bos taurus OX=9913 GN=PEPD PE=3 SV=1;>tr|F6Q234|F6Q234_BOVIN Peptidase D OS=Bos taurus OX=9913 GN=PEPD PE=3 SV=1;>tr|A0A3Q1NGC5|A0A3Q1NGC5_BOVIN Peptidase D OS=Bos taurus OX=9913 GN=PEPD PE=3 SV=1	3	2	2	2	1	1	1	1	1	1	1	1	1	5	5	5	42.798	381	381;493;494	3.33			2	1			0	74.436	By MS/MS	By MS/MS	By MS/MS	66718	69354	83095	62563	78816	54905	108150	87032	55342	54074	66718	69354	83095
tr|A0A3Q1NJB1|A0A3Q1NJB1_BOVIN;tr|F1N076|F1N076_BOVIN;tr|A0A3Q1LQ81|A0A3Q1LQ81_BOVIN;tr|A0A3Q1MI22|A0A3Q1MI22_BOVIN;tr|A0A3Q1LR93|A0A3Q1LR93_BOVIN	tr|A0A3Q1NJB1|A0A3Q1NJB1_BOVIN;tr|F1N076|F1N076_BOVIN;tr|A0A3Q1LQ81|A0A3Q1LQ81_BOVIN;tr|A0A3Q1MI22|A0A3Q1MI22_BOVIN	52;52;51;51;20	2;2;2;2;1	2;2;2;2;1	>tr|A0A3Q1NJB1|A0A3Q1NJB1_BOVIN Ceruloplasmin OS=Bos taurus OX=9913 GN=CP PE=1 SV=1;>tr|F1N076|F1N076_BOVIN Ceruloplasmin OS=Bos taurus OX=9913 GN=CP PE=1 SV=3;>tr|A0A3Q1LQ81|A0A3Q1LQ81_BOVIN Ceruloplasmin OS=Bos taurus OX=9913 GN=CP PE=1 SV=1;>tr|A0A3Q1MI	5	52	2	2	44	46	38	1	2	1	1	2	1	52.7	3.7	3.7	120.78	1060	1060;1074;1014;1043;1063	4.71			1		6		0	162.91	By MS/MS	By MS/MS	By MS/MS	597260	342210	459190	494310	385620	525860	620650	936120	417530	914590	597260	342210	459190
tr|A0A3Q1NJR8|A0A3Q1NJR8_BOVIN;sp|P41361|ANT3_BOVIN;CON__P41361;tr|F1MSZ6|F1MSZ6_BOVIN;tr|A0A3Q1MS55|A0A3Q1MS55_BOVIN	tr|A0A3Q1NJR8|A0A3Q1NJR8_BOVIN;sp|P41361|ANT3_BOVIN;CON__P41361;tr|F1MSZ6|F1MSZ6_BOVIN;tr|A0A3Q1MS55|A0A3Q1MS55_BOVIN	39;36;36;35;35	39;36;36;35;35	39;36;36;35;35	>tr|A0A3Q1NJR8|A0A3Q1NJR8_BOVIN Antithrombin-III OS=Bos taurus OX=9913 GN=SERPINC1 PE=3 SV=1;>sp|P41361|ANT3_BOVIN Antithrombin-III OS=Bos taurus OX=9913 GN=SERPINC1 PE=1 SV=2;>P41361 SWISS-PROT:P41361 (Bos taurus) Antithrombin-III precursor;>tr|F1MSZ6|F1M	5	39	39	39	36	34	33	36	34	33	36	34	33	53	53	53	60.068	530	530;465;465;429;494	3.46	53	30	52	50	32	48	0	323.31	By MS/MS	By MS/MS	By MS/MS	62147000	72006000	84523000	65988000	73162000	69007000	61400000	64826000	65088000	68781000	62147000	72006000	84523000
tr|A0A3Q1NNJ3|A0A3Q1NNJ3_BOVIN;sp|P52556|BLVRB_BOVIN	tr|A0A3Q1NNJ3|A0A3Q1NNJ3_BOVIN;sp|P52556|BLVRB_BOVIN	1;1	1;1	1;1	>tr|A0A3Q1NNJ3|A0A3Q1NNJ3_BOVIN Flavin reductase (NADPH) OS=Bos taurus OX=9913 GN=BLVRB PE=1 SV=1;>sp|P52556|BLVRB_BOVIN Flavin reductase (NADPH) OS=Bos taurus OX=9913 GN=BLVRB PE=1 SV=2	2	1	1	1	0	1	1	0	1	1	0	1	1	5.3	5.3	5.3	20.511	190	190;206	2		2					0.0038023	2.6771	By matching	By matching	By MS/MS	6957.8	9926	7776.1	9608.3	8628.8	6121.6	10579	10246	8205.5	14820	6957.8	9926	7776.1
tr|A0A3S5ZP40|A0A3S5ZP40_BOVIN	tr|A0A3S5ZP40|A0A3S5ZP40_BOVIN	2	2	2	>tr|A0A3S5ZP40|A0A3S5ZP40_BOVIN Attractin OS=Bos taurus OX=9913 GN=ATRN PE=4 SV=1	1	2	2	2	1	1	2	1	1	2	1	1	2	1.8	1.8	1.8	157.42	1415	1415	2.8		1	4				0	4.6134	By matching	By matching	By MS/MS	48249	34947	40001	40451	32586	52595	37411	55230	27630	48632	48249	34947	40001
tr|A0A452DHX8|A0A452DHX8_BOVIN;tr|E1BC09|E1BC09_BOVIN	tr|A0A452DHX8|A0A452DHX8_BOVIN	18;1	9;0	7;0	>tr|A0A452DHX8|A0A452DHX8_BOVIN Amine oxidase OS=Bos taurus OX=9913 GN=LOC100138645 PE=3 SV=1	2	18	9	7	17	13	12	8	8	5	7	6	3	24.8	14.1	11.7	87.144	787	787;828	2.35	13	2	7		1	3	0	178	By MS/MS	By MS/MS	By MS/MS	2440800	2750000	2341400	2677600	2513200	2159700	2750500	2741100	2645000	2265900	2440800	2750000	2341400
tr|A0A452DHZ3|A0A452DHZ3_BOVIN;sp|Q9N2I2|IPSP_BOVIN;CON__Q9N2I2;tr|A0A3Q1MRW0|A0A3Q1MRW0_BOVIN;tr|A0A3Q1LP66|A0A3Q1LP66_BOVIN	tr|A0A452DHZ3|A0A452DHZ3_BOVIN;sp|Q9N2I2|IPSP_BOVIN;CON__Q9N2I2	3;3;3;1;1	3;3;3;1;1	3;3;3;1;1	>tr|A0A452DHZ3|A0A452DHZ3_BOVIN Plasma serine protease inhibitor OS=Bos taurus OX=9913 GN=SERPINA5 PE=3 SV=1;>sp|Q9N2I2|IPSP_BOVIN Plasma serine protease inhibitor OS=Bos taurus OX=9913 GN=SERPINA5 PE=1 SV=1;>Q9N2I2 SWISS-PROT:Q9N2I2 (Bos taurus) Plasma se	5	3	3	3	2	3	0	2	3	0	2	3	0	6.4	6.4	6.4	43.567	389	389;404;404;333;369	2.4		3	2				0	4.2724	By MS/MS	By MS/MS	By matching	302200	402410	383450	502090	459410	270980	369810	372570	558460	369430	302200	402410	383450
tr|A0A452DHZ7|A0A452DHZ7_BOVIN;sp|Q3T0E5|APMAP_BOVIN	tr|A0A452DHZ7|A0A452DHZ7_BOVIN;sp|Q3T0E5|APMAP_BOVIN	3;3	3;3	3;3	>tr|A0A452DHZ7|A0A452DHZ7_BOVIN Adipocyte plasma membrane-associated protein OS=Bos taurus OX=9913 GN=APMAP PE=4 SV=1;>sp|Q3T0E5|APMAP_BOVIN Adipocyte plasma membrane-associated protein OS=Bos taurus OX=9913 GN=APMAP PE=2 SV=1	2	3	3	3	2	1	1	2	1	1	2	1	1	8.3	8.3	8.3	46.091	412	412;412	2.75	1		2	1			0	7.022	By MS/MS	By MS/MS	By MS/MS	101080	75987	83859	87162	61469	106860	70440	118610	86561	131230	101080	75987	83859
tr|A0A452DJ62|A0A452DJ62_BOVIN;sp|Q3SWW8|TSP4_BOVIN	tr|A0A452DJ62|A0A452DJ62_BOVIN;sp|Q3SWW8|TSP4_BOVIN	2;2	2;2	2;2	>tr|A0A452DJ62|A0A452DJ62_BOVIN Thrombospondin-4 OS=Bos taurus OX=9913 GN=THBS4 PE=4 SV=1;>sp|Q3SWW8|TSP4_BOVIN Thrombospondin-4 OS=Bos taurus OX=9913 GN=THBS4 PE=2 SV=1	2	2	2	2	1	1	0	1	1	0	1	1	0	3.1	3.1	3.1	105.95	961	961;961	1.5	1	1					0	58.967	By MS/MS	By MS/MS	By matching	26926	30998	25210	26354	32260	34470	26889	44493	33307	32659	26926	30998	25210
tr|A0A452DK44|A0A452DK44_BOVIN;sp|Q3ZCH5|ZA2G_BOVIN	tr|A0A452DK44|A0A452DK44_BOVIN;sp|Q3ZCH5|ZA2G_BOVIN	10;10	10;10	10;10	>tr|A0A452DK44|A0A452DK44_BOVIN Zinc-alpha-2-glycoprotein OS=Bos taurus OX=9913 GN=AZGP1 PE=3 SV=1;>sp|Q3ZCH5|ZA2G_BOVIN Zinc-alpha-2-glycoprotein OS=Bos taurus OX=9913 GN=AZGP1 PE=2 SV=1	2	10	10	10	6	7	9	6	7	9	6	7	9	32.8	32.8	32.8	33.841	299	299;299	3.78	3	4	6	7	8	4	0	104.52	By MS/MS	By MS/MS	By MS/MS	1373800	1221300	1268700	1362100	1256800	1377000	1658500	1443800	1325800	1308700	1373800	1221300	1268700
tr|A2VE41|A2VE41_BOVIN;tr|A0A3Q1N0S5|A0A3Q1N0S5_BOVIN;tr|A0A3Q1MIU1|A0A3Q1MIU1_BOVIN	tr|A2VE41|A2VE41_BOVIN;tr|A0A3Q1N0S5|A0A3Q1N0S5_BOVIN;tr|A0A3Q1MIU1|A0A3Q1MIU1_BOVIN	6;5;5	6;5;5	6;5;5	>tr|A2VE41|A2VE41_BOVIN EGF containing fibulin extracellular matrix protein 1 OS=Bos taurus OX=9913 GN=EFEMP1 PE=1 SV=1;>tr|A0A3Q1N0S5|A0A3Q1N0S5_BOVIN EGF containing fibulin extracellular matrix protein 1 OS=Bos taurus OX=9913 GN=EFEMP1 PE=1 SV=1;>tr|A0A3	3	6	6	6	2	5	5	2	5	5	2	5	5	14.9	14.9	14.9	54.835	498	498;418;458	3.83	2	3		1	2	4	0	7.4715	By MS/MS	By MS/MS	By MS/MS	203800	217680	233760	201800	212290	197250	245880	238600	180900	236700	203800	217680	233760
tr|A5D9E9|A5D9E9_BOVIN;tr|A0A3Q1MGP1|A0A3Q1MGP1_BOVIN;tr|F1N0N3|F1N0N3_BOVIN	tr|A5D9E9|A5D9E9_BOVIN;tr|A0A3Q1MGP1|A0A3Q1MGP1_BOVIN	21;21;2	21;21;2	21;21;2	>tr|A5D9E9|A5D9E9_BOVIN Complement C1r OS=Bos taurus OX=9913 GN=C1R PE=2 SV=1;>tr|A0A3Q1MGP1|A0A3Q1MGP1_BOVIN Complement C1r OS=Bos taurus OX=9913 GN=C1R PE=3 SV=1	3	21	21	21	20	17	13	20	17	13	20	17	13	38	38	38	80.212	705	705;713;407	3.39	13	13	12	9	14	10	0	323.31	By MS/MS	By MS/MS	By MS/MS	4923400	5290600	5491500	4215500	5577200	5671100	6379500	5932100	6198100	5219000	4923400	5290600	5491500
tr|A5PJ69|A5PJ69_BOVIN;CON__ENSEMBL:ENSBTAP00000013050;tr|A0A3Q1NJ03|A0A3Q1NJ03_BOVIN	tr|A5PJ69|A5PJ69_BOVIN;CON__ENSEMBL:ENSBTAP00000013050;tr|A0A3Q1NJ03|A0A3Q1NJ03_BOVIN	10;10;7	10;10;7	10;10;7	>tr|A5PJ69|A5PJ69_BOVIN SERPINA10 protein OS=Bos taurus OX=9913 GN=SERPINA10 PE=2 SV=1;>ENSEMBL:ENSBTAP00000013050 (Bos taurus) hypothetical protein;>tr|A0A3Q1NJ03|A0A3Q1NJ03_BOVIN Serpin family A member 10 OS=Bos taurus OX=9913 GN=SERPINA10 PE=3 SV=1	3	10	10	10	10	10	5	10	10	5	10	10	5	22.3	22.3	22.3	51.988	452	452;452;409	2.69	9	7	11			5	0	268.27	By MS/MS	By MS/MS	By MS/MS	3039900	3016900	3661900	3172600	3279000	3314800	3951300	4202500	2671600	3812000	3039900	3016900	3661900
tr|A5PJF9|A5PJF9_BOVIN	tr|A5PJF9|A5PJF9_BOVIN	1	1	1	>tr|A5PJF9|A5PJF9_BOVIN UEV and lactate/malate dehyrogenase domains OS=Bos taurus OX=9913 GN=UEVLD PE=2 SV=1	1	1	1	1	0	0	1	0	0	1	0	0	1	2.1	2.1	2.1	52.237	471	471	3			1				1	-2	By matching	By matching	By MS/MS	10154	10319	7927.2	11976	6513.6	5051.1	9809.1	10710	10730	9220.7	10154	10319	7927.2
tr|A5PJV7|A5PJV7_BOVIN	tr|A5PJV7|A5PJV7_BOVIN	1	1	1	>tr|A5PJV7|A5PJV7_BOVIN NGFR protein OS=Bos taurus OX=9913 GN=NGFR PE=2 SV=1	1	1	1	1	1	0	0	1	0	0	1	0	0	3.3	3.3	3.3	45.499	429	429	3			1				1	-2	By MS/MS	By matching	By matching	36574	30502	31449	40749	37755	44224	35960	60097	44066	39330	36574	30502	31449
tr|A5PK73|A5PK73_BOVIN;sp|Q3T0S5|ALDOB_BOVIN;tr|G3MXL6|G3MXL6_BOVIN;tr|A0A3Q1MFK7|A0A3Q1MFK7_BOVIN;tr|A0A3S5ZPB0|A0A3S5ZPB0_BOVIN	tr|A5PK73|A5PK73_BOVIN;sp|Q3T0S5|ALDOB_BOVIN;tr|G3MXL6|G3MXL6_BOVIN;tr|A0A3Q1MFK7|A0A3Q1MFK7_BOVIN	4;4;4;3;1	4;4;4;3;1	3;3;3;2;0	>tr|A5PK73|A5PK73_BOVIN Fructose-bisphosphate aldolase OS=Bos taurus OX=9913 GN=ALDOB PE=2 SV=1;>sp|Q3T0S5|ALDOB_BOVIN Fructose-bisphosphate aldolase B OS=Bos taurus OX=9913 GN=ALDOB PE=2 SV=1;>tr|G3MXL6|G3MXL6_BOVIN Fructose-bisphosphate aldolase OS=Bos t	5	4	4	3	3	3	2	3	3	2	3	2	2	15.1	15.1	13.2	39.527	364	364;364;420;384;510	3.12		2	3	3			0	112.56	By MS/MS	By MS/MS	By MS/MS	266190	302460	268940	251750	365720	239500	419460	312530	402090	270050	266190	302460	268940
tr|A5PKC2|A5PKC2_BOVIN;CON__Q6T181	tr|A5PKC2|A5PKC2_BOVIN;CON__Q6T181	9;9	9;9	9;9	>tr|A5PKC2|A5PKC2_BOVIN SHBG protein OS=Bos taurus OX=9913 GN=SHBG PE=2 SV=1;>Q6T181 TREMBL:Q6T181;Q6T182 (Bos taurus) similar to sex hormone-binding globulin	2	9	9	9	8	8	3	8	8	3	8	8	3	28.9	28.9	28.9	43.315	401	401;401	3.41		10	11	9	5	2	0	253.8	By MS/MS	By MS/MS	By MS/MS	1603500	1960200	1896100	1379100	2078400	1973100	1801500	1501800	1550900	1205700	1603500	1960200	1896100
tr|A6QLL8|A6QLL8_BOVIN;tr|A0A3Q1LMG1|A0A3Q1LMG1_BOVIN	tr|A6QLL8|A6QLL8_BOVIN;tr|A0A3Q1LMG1|A0A3Q1LMG1_BOVIN	4;4	3;3	3;3	>tr|A6QLL8|A6QLL8_BOVIN Fructose-bisphosphate aldolase OS=Bos taurus OX=9913 GN=ALDOA PE=1 SV=1;>tr|A0A3Q1LMG1|A0A3Q1LMG1_BOVIN Fructose-bisphosphate aldolase OS=Bos taurus OX=9913 GN=ALDOA PE=1 SV=1	2	4	3	3	1	3	3	1	2	3	1	2	3	11.5	9.6	9.6	39.436	364	364;365	2.83	3			1	2		0	3.9266	By matching	By MS/MS	By MS/MS	30127	41714	38727	22410	27946	18101	40907	27888	32615	30595	30127	41714	38727
tr|A6QNW7|A6QNW7_BOVIN;CON__ENSEMBL:ENSBTAP00000031360;tr|A0A3Q1MHR7|A0A3Q1MHR7_BOVIN;tr|F1MLF3|F1MLF3_BOVIN	tr|A6QNW7|A6QNW7_BOVIN;CON__ENSEMBL:ENSBTAP00000031360	21;16;6;1	21;16;6;1	21;16;6;1	>tr|A6QNW7|A6QNW7_BOVIN CD5 molecule like OS=Bos taurus OX=9913 GN=CD5L PE=2 SV=1;>ENSEMBL:ENSBTAP00000031360 (Bos taurus) 55 kDa protein	4	21	21	21	18	20	15	18	20	15	18	20	15	48.6	48.6	48.6	50.211	451	451;491;532;498	3.75	23	7	14	14	19	26	0	323.31	By MS/MS	By MS/MS	By MS/MS	18761000	22608000	19253000	17389000	17020000	15646000	23521000	22094000	15837000	22870000	18761000	22608000	19253000
tr|A6QP30|A6QP30_BOVIN	tr|A6QP30|A6QP30_BOVIN	9	9	9	>tr|A6QP30|A6QP30_BOVIN CPN2 protein OS=Bos taurus OX=9913 GN=CPN2 PE=2 SV=1	1	9	9	9	7	7	5	7	7	5	7	7	5	17	17	17	60.039	548	548	2.83	7	4	8		1	4	0	132.58	By MS/MS	By MS/MS	By MS/MS	1466700	1181400	1146500	1532000	1185000	1551700	1476500	1707700	1603600	1720600	1466700	1181400	1146500
tr|A6QQR5|A6QQR5_BOVIN	tr|A6QQR5|A6QQR5_BOVIN	1	1	1	>tr|A6QQR5|A6QQR5_BOVIN TMEM43 protein OS=Bos taurus OX=9913 GN=TMEM43 PE=1 SV=1	1	1	1	1	1	0	0	1	0	0	1	0	0	2.8	2.8	2.8	44.791	400	400	5.5					1	1	1	-2	By MS/MS	By matching	By matching	24223	13396	11151	64015	11508	19793	16566	45997	96474	42686	24223	13396	11151
tr|A7MB59|A7MB59_BOVIN;tr|A0A3Q1MWV1|A0A3Q1MWV1_BOVIN	tr|A7MB59|A7MB59_BOVIN;tr|A0A3Q1MWV1|A0A3Q1MWV1_BOVIN	1;1	1;1	1;1	>tr|A7MB59|A7MB59_BOVIN MAD1L1 protein OS=Bos taurus OX=9913 GN=MAD1L1 PE=2 SV=1;>tr|A0A3Q1MWV1|A0A3Q1MWV1_BOVIN Mitotic arrest deficient 1 like 1 OS=Bos taurus OX=9913 GN=MAD1L1 PE=4 SV=1	2	1	1	1	1	1	0	1	1	0	1	1	0	1.1	1.1	1.1	82.779	717	717;718	3.25			3	1			1	-2	By MS/MS	By MS/MS	By matching	599540	1064600	846150	415190	1206000	690180	830000	1426800	550380	389300	599540	1064600	846150
tr|C4T8B4|C4T8B4_BOVIN	tr|C4T8B4|C4T8B4_BOVIN	7	7	7	>tr|C4T8B4|C4T8B4_BOVIN Pentaxin OS=Bos taurus OX=9913 GN=CRP PE=2 SV=1	1	7	7	7	7	6	5	7	6	5	7	6	5	33.5	33.5	33.5	25.292	224	224	2.64	12	10	12	5	2	3	0	169.58	By MS/MS	By MS/MS	By MS/MS	7987500	16771000	13378000	22027000	10741000	12171000	4771300	6439500	4666400	6659000	7987500	16771000	13378000
tr|E1B726|E1B726_BOVIN;tr|A7E350|A7E350_BOVIN	tr|E1B726|E1B726_BOVIN;tr|A7E350|A7E350_BOVIN	73;59	3;3	3;3	>tr|E1B726|E1B726_BOVIN Plasminogen OS=Bos taurus OX=9913 GN=PLG PE=3 SV=2;>tr|A7E350|A7E350_BOVIN PLG protein OS=Bos taurus OX=9913 GN=PLG PE=2 SV=1	2	73	3	3	59	58	69	3	3	2	3	3	2	69.2	6.9	6.9	91.242	812	812;724	4.47	3			4	3	7	0	220.37	By MS/MS	By MS/MS	By MS/MS	2654900	3079100	4083200	1986200	4095700	3746000	4142200	2740000	1629700	2480200	2654900	3079100	4083200
tr|E1B805|E1B805_BOVIN;tr|A0A3Q1M3A4|A0A3Q1M3A4_BOVIN	tr|E1B805|E1B805_BOVIN;tr|A0A3Q1M3A4|A0A3Q1M3A4_BOVIN	51;48	51;48	51;48	>tr|E1B805|E1B805_BOVIN Uncharacterized protein OS=Bos taurus OX=9913 GN=LOC528040 PE=4 SV=3;>tr|A0A3Q1M3A4|A0A3Q1M3A4_BOVIN Uncharacterized protein OS=Bos taurus OX=9913 GN=LOC528040 PE=4 SV=1	2	51	51	51	49	44	28	49	44	28	49	44	28	36.1	36.1	36.1	186.35	1662	1662;1699	3.73	23	29	28	42	41	31	0	323.31	By MS/MS	By MS/MS	By MS/MS	12795000	17307000	17313000	12993000	19135000	18352000	17828000	14336000	12069000	11596000	12795000	17307000	17313000
tr|E1BCJ2|E1BCJ2_BOVIN;tr|A0A3Q1M3I2|A0A3Q1M3I2_BOVIN;tr|A0A3Q1MI46|A0A3Q1MI46_BOVIN	tr|E1BCJ2|E1BCJ2_BOVIN;tr|A0A3Q1M3I2|A0A3Q1M3I2_BOVIN;tr|A0A3Q1MI46|A0A3Q1MI46_BOVIN	3;3;2	3;3;2	3;3;2	>tr|E1BCJ2|E1BCJ2_BOVIN Uncharacterized protein OS=Bos taurus OX=9913 GN=CFHR5 PE=4 SV=3;>tr|A0A3Q1M3I2|A0A3Q1M3I2_BOVIN Uncharacterized protein OS=Bos taurus OX=9913 GN=CFHR5 PE=4 SV=1;>tr|A0A3Q1MI46|A0A3Q1MI46_BOVIN Uncharacterized protein OS=Bos taurus	3	3	3	3	3	2	2	3	2	2	3	2	2	6.4	6.4	6.4	73.684	659	659;673;612	5.14	1				1	5	0	9.0109	By MS/MS	By MS/MS	By MS/MS	71346	70614	77842	69695	64992	71055	80405	84021	87651	78275	71346	70614	77842
tr|E1BCW0|E1BCW0_BOVIN;CON__ENSEMBL:ENSBTAP00000023055	tr|E1BCW0|E1BCW0_BOVIN;CON__ENSEMBL:ENSBTAP00000023055	13;10	13;10	13;10	>tr|E1BCW0|E1BCW0_BOVIN HGF activator OS=Bos taurus OX=9913 GN=HGFAC PE=3 SV=3;>ENSEMBL:ENSBTAP00000023055 (Bos taurus) 68 kDa protein	2	13	13	13	9	10	9	9	10	9	9	10	9	22.3	22.3	22.3	69.559	651	651;634	3.08	5	17	4	15	8		0	323.31	By MS/MS	By MS/MS	By MS/MS	2516400	2423000	2271300	2726000	2470400	2536700	3013700	3168600	3046000	2561600	2516400	2423000	2271300
tr|E1BDE2|E1BDE2_BOVIN	tr|E1BDE2|E1BDE2_BOVIN	1	1	1	>tr|E1BDE2|E1BDE2_BOVIN Exonuclease 3-5 domain containing 1 OS=Bos taurus OX=9913 GN=EXD1 PE=4 SV=2	1	1	1	1	0	1	1	0	1	1	0	1	1	2.5	2.5	2.5	54.262	477	477	6						2	1	-2	By matching	By MS/MS	By matching	78671	93976	129470	63565	142690	62322	147820	130580	90137	52789	78671	93976	129470
tr|E1BDW7|E1BDW7_BOVIN;sp|Q24K22|HGFL_BOVIN;tr|A0A3Q1LSX3|A0A3Q1LSX3_BOVIN	tr|E1BDW7|E1BDW7_BOVIN;sp|Q24K22|HGFL_BOVIN;tr|A0A3Q1LSX3|A0A3Q1LSX3_BOVIN	6;6;4	6;6;4	6;6;4	>tr|E1BDW7|E1BDW7_BOVIN Hepatocyte growth factor-like protein OS=Bos taurus OX=9913 GN=MST1 PE=3 SV=2;>sp|Q24K22|HGFL_BOVIN Hepatocyte growth factor-like protein OS=Bos taurus OX=9913 GN=MST1 PE=2 SV=1;>tr|A0A3Q1LSX3|A0A3Q1LSX3_BOVIN Hepatocyte growth fact	3	6	6	6	3	4	5	3	4	5	3	4	5	9.8	9.8	9.8	79.91	712	712;712;698	3.67	3	3			8	1	0	52.049	By MS/MS	By MS/MS	By MS/MS	320340	343810	363530	346100	378130	348590	438620	373540	338590	362130	320340	343810	363530
tr|E1BF36|E1BF36_BOVIN	tr|E1BF36|E1BF36_BOVIN	1	1	1	>tr|E1BF36|E1BF36_BOVIN Olfactory receptor OS=Bos taurus OX=9913 GN=OR52D1 PE=3 SV=2	1	1	1	1	1	0	1	1	0	1	1	0	1	3.1	3.1	3.1	35.214	318	318	1	2						1	-2	By MS/MS	By matching	By matching	82146	121790	134730	61959	158630	114880	132190	65813	53223	54628	82146	121790	134730
tr|E1BGG5|E1BGG5_BOVIN	tr|E1BGG5|E1BGG5_BOVIN	1	1	1	>tr|E1BGG5|E1BGG5_BOVIN Solute carrier family 36 member 2 OS=Bos taurus OX=9913 GN=SLC36A2 PE=4 SV=1	1	1	1	1	1	1	0	1	1	0	1	1	0	1.7	1.7	1.7	53.392	482	482	3			2				1	-2	By MS/MS	By MS/MS	By matching	183210	201070	203320	175450	233490	245000	203410	204440	208350	193220	183210	201070	203320
tr|E1BH06|E1BH06_BOVIN;CON__P01030;REV__tr|E1BN42|E1BN42_BOVIN;sp|Q58DH8|FEN1_BOVIN	tr|E1BH06|E1BH06_BOVIN;CON__P01030	101;101;1;1	21;21;0;0	13;13;0;0	>tr|E1BH06|E1BH06_BOVIN Uncharacterized protein OS=Bos taurus OX=9913 GN=C4A PE=1 SV=3;>P01030 SWISS-PROT:P01030 (Bos taurus) similar to Complement C4-A precursor	4	101	21	13	81	83	86	18	16	19	12	10	12	58.4	13.4	8.3	192.79	1741	1741;1741;348;380	2.87	22	24	19	2	15	8	0	323.31	By MS/MS	By MS/MS	By MS/MS	8052200	8433900	10181000	6902200	9277800	8560500	10820000	9100300	7155900	7116600	8052200	8433900	10181000
tr|E1BH94|E1BH94_BOVIN;CON__ENSEMBL:ENSBTAP00000016285	tr|E1BH94|E1BH94_BOVIN;CON__ENSEMBL:ENSBTAP00000016285	7;7	7;7	7;7	>tr|E1BH94|E1BH94_BOVIN Peptidoglycan recognition protein 2 OS=Bos taurus OX=9913 GN=PGLYRP2 PE=4 SV=3;>ENSEMBL:ENSBTAP00000016285 (Bos taurus) similar to peptidoglycan recognition protein L	2	7	7	7	6	6	5	6	6	5	6	6	5	15.1	15.1	15.1	63.485	591	591;591	4		1	8	4	4	3	0	192.92	By MS/MS	By MS/MS	By MS/MS	1071900	1029100	1161400	1124100	1165500	966570	1247900	1352400	1107200	1037300	1071900	1029100	1161400
tr|E1BJ49|E1BJ49_BOVIN;tr|I2E4T6|I2E4T6_BOVIN	tr|E1BJ49|E1BJ49_BOVIN;tr|I2E4T6|I2E4T6_BOVIN	6;3	6;3	6;3	>tr|E1BJ49|E1BJ49_BOVIN Mannan binding lectin serine peptidase 2 OS=Bos taurus OX=9913 GN=MASP2 PE=3 SV=3;>tr|I2E4T6|I2E4T6_BOVIN Mannan binding lectin serine peptidase 2 OS=Bos taurus OX=9913 GN=MASP2 PE=2 SV=1	2	6	6	6	3	2	3	3	2	3	3	2	3	9.2	9.2	9.2	76.384	686	686;118	2.38	4	2			1	1	0	213.53	By MS/MS	By MS/MS	By MS/MS	279300	328390	345790	253750	363860	318310	405660	286410	279410	292170	279300	328390	345790
tr|E1BJF9|E1BJF9_BOVIN	tr|E1BJF9|E1BJF9_BOVIN	11	3	2	>tr|E1BJF9|E1BJF9_BOVIN Serum amyloid A protein OS=Bos taurus OX=9913 GN=LOC104968478 PE=3 SV=2	1	11	3	2	9	8	8	3	1	2	2	1	2	44.1	13.6	7.9	19.635	177	177	2.95	8	1		4	6		0	31.57	By MS/MS	By MS/MS	By MS/MS	542360	441110	565470	723390	469980	450060	537820	2192200	229980	1103900	542360	441110	565470
tr|E1BME2|E1BME2_BOVIN	tr|E1BME2|E1BME2_BOVIN	2	2	2	>tr|E1BME2|E1BME2_BOVIN AP-3 complex subunit beta OS=Bos taurus OX=9913 GN=AP3B2 PE=3 SV=2	1	2	2	2	2	1	0	2	1	0	2	1	0	3.4	3.4	3.4	119.52	1085	1085	1.6	4			1			0.0074074	2.182	By MS/MS	By MS/MS	By matching	705590	353290	426940	662840	264610	378520	276050	880640	1047800	459920	705590	353290	426940
tr|E1BMJ0|E1BMJ0_BOVIN;sp|P50448|F12AI_BOVIN;CON__P50448	tr|E1BMJ0|E1BMJ0_BOVIN;sp|P50448|F12AI_BOVIN;CON__P50448	10;10;10	10;10;10	10;10;10	>tr|E1BMJ0|E1BMJ0_BOVIN Serpin family G member 1 OS=Bos taurus OX=9913 GN=SERPING1 PE=3 SV=3;>sp|P50448|F12AI_BOVIN Factor XIIa inhibitor OS=Bos taurus OX=9913 PE=1 SV=1;>P50448 SWISS-PROT:P50448 (Bos taurus) Factor XIIa inhibitor precursor	3	10	10	10	8	9	7	8	9	7	8	9	7	21.8	21.8	21.8	51.772	468	468;468;468	2.26	17	5	6	3	2	2	0	205.94	By MS/MS	By MS/MS	By MS/MS	3556300	3437100	3647700	2048000	4657900	2826200	4723900	5112000	2498100	4733200	3556300	3437100	3647700
tr|E1BNR0|E1BNR0_BOVIN;tr|A0A3Q1MFR4|A0A3Q1MFR4_BOVIN;CON__ENSEMBL:ENSBTAP00000032840	tr|E1BNR0|E1BNR0_BOVIN;tr|A0A3Q1MFR4|A0A3Q1MFR4_BOVIN	30;29;8	30;29;8	30;29;8	>tr|E1BNR0|E1BNR0_BOVIN Apolipoprotein B OS=Bos taurus OX=9913 GN=APOB PE=1 SV=3;>tr|A0A3Q1MFR4|A0A3Q1MFR4_BOVIN Apolipoprotein B OS=Bos taurus OX=9913 GN=APOB PE=1 SV=1	3	30	30	30	21	20	14	21	20	14	21	20	14	8.1	8.1	8.1	515.51	4567	4567;4554;825	3.67	12	5	11	16	16	9	0	317.28	By MS/MS	By MS/MS	By MS/MS	1491400	1889000	2000800	1336600	2149800	1837400	1885000	1556500	1458100	1781300	1491400	1889000	2000800
tr|F1MAV0|F1MAV0_BOVIN;CON__P02676;tr|A0A3Q1MG04|A0A3Q1MG04_BOVIN;sp|P02676|FIBB_BOVIN	tr|F1MAV0|F1MAV0_BOVIN;CON__P02676;tr|A0A3Q1MG04|A0A3Q1MG04_BOVIN;sp|P02676|FIBB_BOVIN	10;10;10;9	10;10;10;9	10;10;10;9	>tr|F1MAV0|F1MAV0_BOVIN Fibrinogen beta chain OS=Bos taurus OX=9913 GN=FGB PE=4 SV=3;>P02676 SWISS-PROT:P02676 (Bos taurus) similar to Fibrinogen beta chain precursor;>tr|A0A3Q1MG04|A0A3Q1MG04_BOVIN Fibrinogen beta chain OS=Bos taurus OX=9913 GN=FGB PE=4 S	4	10	10	10	6	4	9	6	4	9	6	4	9	24.5	24.5	24.5	54.314	477	477;495;504;468	2.63	8	3	1	2	5		0	85.224	By MS/MS	By MS/MS	By MS/MS	770130	835010	967640	793780	877410	863540	822340	888360	874950	1194200	770130	835010	967640
tr|F1MAV4|F1MAV4_BOVIN	tr|F1MAV4|F1MAV4_BOVIN	1	1	1	>tr|F1MAV4|F1MAV4_BOVIN BRCA1 associated RING domain 1 OS=Bos taurus OX=9913 GN=BARD1 PE=4 SV=3	1	1	1	1	1	1	1	1	1	1	1	1	1	1.2	1.2	1.2	85.827	773	773	2.67		2	4				0	3.5149	By MS/MS	By MS/MS	By MS/MS	581160	615340	536740	453680	632800	683760	706230	733240	684570	948270	581160	615340	536740
tr|F1MBC5|F1MBC5_BOVIN;sp|P00741|FA9_BOVIN	tr|F1MBC5|F1MBC5_BOVIN;sp|P00741|FA9_BOVIN	11;11	11;11	11;11	>tr|F1MBC5|F1MBC5_BOVIN Coagulation factor IX OS=Bos taurus OX=9913 GN=F9 PE=3 SV=3;>sp|P00741|FA9_BOVIN Coagulation factor IX OS=Bos taurus OX=9913 GN=F9 PE=1 SV=2	2	11	11	11	8	8	6	8	8	6	8	8	6	30.6	30.6	30.6	50.358	447	447;462	2.57	6	10	7	5	2		0	258.8	By MS/MS	By MS/MS	By MS/MS	5173900	6079000	5667400	4203700	6367900	6177700	6322200	6856000	5185400	5084300	5173900	6079000	5667400
tr|F1MBS3|F1MBS3_BOVIN;sp|P55906|BGH3_BOVIN;tr|A0A3Q1MNL9|A0A3Q1MNL9_BOVIN	tr|F1MBS3|F1MBS3_BOVIN;sp|P55906|BGH3_BOVIN;tr|A0A3Q1MNL9|A0A3Q1MNL9_BOVIN	4;4;3	4;4;3	4;4;3	>tr|F1MBS3|F1MBS3_BOVIN Transforming growth factor-beta-induced protein ig-h3 OS=Bos taurus OX=9913 GN=TGFBI PE=1 SV=3;>sp|P55906|BGH3_BOVIN Transforming growth factor-beta-induced protein ig-h3 OS=Bos taurus OX=9913 GN=TGFBI PE=1 SV=2;>tr|A0A3Q1MNL9|A0A3Q	3	4	4	4	3	3	3	3	3	3	3	3	3	8	8	8	70.791	649	649;683;642	4.78			1		8		0	7.5727	By MS/MS	By MS/MS	By MS/MS	85958	90016	88040	75320	82907	78829	99081	92189	81138	98884	85958	90016	88040
tr|F1MDS0|F1MDS0_BOVIN;tr|A0A3Q1LZ67|A0A3Q1LZ67_BOVIN;tr|G3MYM8|G3MYM8_BOVIN;tr|A0A3Q1M1S2|A0A3Q1M1S2_BOVIN	tr|F1MDS0|F1MDS0_BOVIN;tr|A0A3Q1LZ67|A0A3Q1LZ67_BOVIN;tr|G3MYM8|G3MYM8_BOVIN;tr|A0A3Q1M1S2|A0A3Q1M1S2_BOVIN	10;10;9;9	10;10;9;9	10;10;9;9	>tr|F1MDS0|F1MDS0_BOVIN Proteoglycan 4 OS=Bos taurus OX=9913 GN=PRG4 PE=4 SV=3;>tr|A0A3Q1LZ67|A0A3Q1LZ67_BOVIN Proteoglycan 4 OS=Bos taurus OX=9913 GN=PRG4 PE=4 SV=1;>tr|G3MYM8|G3MYM8_BOVIN Proteoglycan 4 OS=Bos taurus OX=9913 GN=PRG4 PE=4 SV=2;>tr|A0A3Q1M	4	10	10	10	6	7	6	6	7	6	6	7	6	11.8	11.8	11.8	129.21	1195	1195;1475;1377;1434	3.63	2	10	2	1	6	6	0	64.827	By MS/MS	By MS/MS	By MS/MS	555670	539990	613830	579630	524120	621470	605470	717980	765260	643050	555670	539990	613830
tr|F1MH27|F1MH27_BOVIN;sp|Q95M17|CHIA_BOVIN;CON__Q95M17	tr|F1MH27|F1MH27_BOVIN;sp|Q95M17|CHIA_BOVIN;CON__Q95M17	1;1;1	1;1;1	1;1;1	>tr|F1MH27|F1MH27_BOVIN Acidic mammalian chitinase OS=Bos taurus OX=9913 GN=CHIA PE=3 SV=2;>sp|Q95M17|CHIA_BOVIN Acidic mammalian chitinase OS=Bos taurus OX=9913 GN=CHIA PE=1 SV=1;>Q95M17 SWISS-PROT:Q95M17 (Bos taurus) Acidic mammalian chitinase precursor	3	1	1	1	0	1	1	0	1	1	0	1	1	3.2	3.2	3.2	52.069	472	472;472;472	6						2	0	41.128	By matching	By MS/MS	By MS/MS	23796	16987	21506	22840	25426	29235	37768	21982	26538	19313	23796	16987	21506
tr|F1MJK3|F1MJK3_BOVIN;CON__ENSEMBL:ENSBTAP00000037665	tr|F1MJK3|F1MJK3_BOVIN	52;16	51;16	0;0	>tr|F1MJK3|F1MJK3_BOVIN Uncharacterized protein OS=Bos taurus OX=9913 GN=LOC506828 PE=4 SV=3	2	52	51	0	43	51	28	42	50	27	0	0	0	37.8	37.3	0	162.94	1462	1462;578	3.15	45	41	70	27	30	27	0	323.31	By MS/MS	By MS/MS	By MS/MS	45357000	55579000	60861000	42383000	66175000	71011000	67841000	48908000	38925000	46851000	45357000	55579000	60861000
tr|F1MJQ3|F1MJQ3_BOVIN;CON__Q3MHH8;tr|F1MP21|F1MP21_BOVIN	tr|F1MJQ3|F1MJQ3_BOVIN;CON__Q3MHH8	13;13;6	13;13;6	13;13;6	>tr|F1MJQ3|F1MJQ3_BOVIN Alpha-amylase OS=Bos taurus OX=9913 GN=AMY2B PE=3 SV=1;>Q3MHH8 TREMBL:Q3MHH8 (Bos taurus) Amylase, alpha 2B; pancreatic	3	13	13	13	11	13	10	11	13	10	11	13	10	37	37	37	57.365	511	511;511;511	4.22	4		10	7	7	12	0	270.17	By MS/MS	By MS/MS	By MS/MS	2919300	3450200	2722500	3171900	2800600	3604600	3727400	3804900	3159400	3560700	2919300	3450200	2722500
tr|F1MKH8|F1MKH8_BOVIN;sp|Q9GLE5|MMP2_BOVIN;tr|A0A3Q1LNI1|A0A3Q1LNI1_BOVIN	tr|F1MKH8|F1MKH8_BOVIN;sp|Q9GLE5|MMP2_BOVIN	3;2;1	3;2;1	3;2;1	>tr|F1MKH8|F1MKH8_BOVIN 72 kDa type IV collagenase OS=Bos taurus OX=9913 GN=MMP2 PE=3 SV=1;>sp|Q9GLE5|MMP2_BOVIN 72 kDa type IV collagenase OS=Bos taurus OX=9913 GN=MMP2 PE=2 SV=1	3	3	3	3	1	1	3	1	1	3	1	1	3	7	7	7	73.847	661	661;661;634	3.4		2		2	1		0	8.1381	By MS/MS	By matching	By MS/MS	44803	46635	45924	46597	54454	43004	52102	47310	45537	42907	44803	46635	45924
tr|F1MKS5|F1MKS5_BOVIN	tr|F1MKS5|F1MKS5_BOVIN	22	22	14	>tr|F1MKS5|F1MKS5_BOVIN Histidine-rich glycoprotein OS=Bos taurus OX=9913 GN=HRG PE=4 SV=3	1	22	22	14	20	21	18	20	21	18	13	14	11	31.9	31.9	21.1	60.742	536	536	3.65	19	24	27	24	33	23	0	323.31	By MS/MS	By MS/MS	By MS/MS	21347000	22731000	25440000	28102000	26720000	24427000	25112000	15516000	23837000	19443000	21347000	22731000	25440000
tr|F1MLW2|F1MLW2_BOVIN;sp|Q8SPF8|BPIB1_BOVIN	tr|F1MLW2|F1MLW2_BOVIN;sp|Q8SPF8|BPIB1_BOVIN	1;1	1;1	1;1	>tr|F1MLW2|F1MLW2_BOVIN BPI fold-containing family B member 1 OS=Bos taurus OX=9913 GN=BPIFB1 PE=4 SV=1;>sp|Q8SPF8|BPIB1_BOVIN BPI fold-containing family B member 1 OS=Bos taurus OX=9913 GN=BPIFB1 PE=2 SV=1	2	1	1	1	1	0	0	1	0	0	1	0	0	4.2	4.2	4.2	51.715	473	473;473	2		1					0	2.8842	By MS/MS	By matching	By matching	22993	12365	15076	25445	10752	22694	17001	31413	146040	28730	22993	12365	15076
tr|F1MLW8|F1MLW8_BOVIN;tr|A0A3Q1LT19|A0A3Q1LT19_BOVIN	tr|F1MLW8|F1MLW8_BOVIN;tr|A0A3Q1LT19|A0A3Q1LT19_BOVIN	9;6	3;2	3;2	>tr|F1MLW8|F1MLW8_BOVIN Uncharacterized protein OS=Bos taurus OX=9913 GN=LOC100847119 PE=1 SV=2;>tr|A0A3Q1LT19|A0A3Q1LT19_BOVIN Uncharacterized protein OS=Bos taurus OX=9913 PE=4 SV=1	2	9	3	3	8	7	8	3	3	3	3	3	3	36.9	14.2	14.2	24.623	233	233;130	3.64	11	9	3	10	12	11	0	323.31	By MS/MS	By MS/MS	By MS/MS	21210000	15695000	11200000	15759000	18949000	25805000	64216000	18747000	13842000	22728000	21210000	15695000	11200000
tr|F1MM32|F1MM32_BOVIN;tr|A0A3Q1N9Y5|A0A3Q1N9Y5_BOVIN	tr|F1MM32|F1MM32_BOVIN;tr|A0A3Q1N9Y5|A0A3Q1N9Y5_BOVIN	2;2	2;2	2;2	>tr|F1MM32|F1MM32_BOVIN Sulfhydryl oxidase OS=Bos taurus OX=9913 GN=QSOX1 PE=4 SV=3;>tr|A0A3Q1N9Y5|A0A3Q1N9Y5_BOVIN Sulfhydryl oxidase OS=Bos taurus OX=9913 GN=QSOX1 PE=4 SV=1	2	2	2	2	1	2	2	1	2	2	1	2	2	4.1	4.1	4.1	67.02	608	608;791	5.2				2		3	0	8.9763	By MS/MS	By MS/MS	By MS/MS	359190	358870	296430	299180	305800	302760	347660	532150	327080	402020	359190	358870	296430
tr|F1MM86|F1MM86_BOVIN;sp|Q29RU4|CO6_BOVIN;tr|A0A3Q1LM32|A0A3Q1LM32_BOVIN;REV__tr|G1K1B6|G1K1B6_BOVIN;REV__sp|Q1JQ92|POP5_BOVIN;REV__tr|A0A3Q1NAH3|A0A3Q1NAH3_BOVIN	tr|F1MM86|F1MM86_BOVIN;sp|Q29RU4|CO6_BOVIN;tr|A0A3Q1LM32|A0A3Q1LM32_BOVIN	49;49;43;1;1;1	49;49;43;1;1;1	49;49;43;1;1;1	>tr|F1MM86|F1MM86_BOVIN Complement component C6 OS=Bos taurus OX=9913 GN=C6 PE=4 SV=2;>sp|Q29RU4|CO6_BOVIN Complement component C6 OS=Bos taurus OX=9913 GN=C6 PE=2 SV=1;>tr|A0A3Q1LM32|A0A3Q1LM32_BOVIN Complement component C6 OS=Bos taurus OX=9913 GN=C6 PE=	6	49	49	49	41	36	42	41	36	42	41	36	42	53	53	53	104.54	932	932;932;935;170;170;174	3.4	38	20	33	36	33	22	0	323.31	By MS/MS	By MS/MS	By MS/MS	15538000	15220000	16066000	14356000	17439000	15908000	18981000	18608000	15883000	15021000	15538000	15220000	16066000
tr|F1MMD7|F1MMD7_BOVIN;tr|A0A3Q1LZ09|A0A3Q1LZ09_BOVIN;sp|Q3T052|ITIH4_BOVIN;CON__Q3T052;tr|A0A3Q1MGQ6|A0A3Q1MGQ6_BOVIN	tr|F1MMD7|F1MMD7_BOVIN;tr|A0A3Q1LZ09|A0A3Q1LZ09_BOVIN;sp|Q3T052|ITIH4_BOVIN;CON__Q3T052;tr|A0A3Q1MGQ6|A0A3Q1MGQ6_BOVIN	43;42;41;41;38	43;42;41;41;38	2;1;2;2;2	>tr|F1MMD7|F1MMD7_BOVIN Inter-alpha-trypsin inhibitor heavy chain H4 OS=Bos taurus OX=9913 GN=ITIH4 PE=4 SV=3;>tr|A0A3Q1LZ09|A0A3Q1LZ09_BOVIN Inter-alpha-trypsin inhibitor heavy chain H4 OS=Bos taurus OX=9913 GN=ITIH4 PE=4 SV=1;>sp|Q3T052|ITIH4_BOVIN Inter	5	43	43	2	41	40	37	41	40	37	2	2	2	45.4	45.4	1.6	101.51	916	916;910;916;916;937	3.44	73	49	63	78	63	52	0	323.31	By MS/MS	By MS/MS	By MS/MS	149240000	120540000	157700000	186210000	123930000	132880000	154930000	167400000	132430000	201270000	149240000	120540000	157700000
tr|F1MMK9|F1MMK9_BOVIN;sp|P00978|AMBP_BOVIN;CON__P00978;tr|A0A3Q1MGB8|A0A3Q1MGB8_BOVIN	tr|F1MMK9|F1MMK9_BOVIN;sp|P00978|AMBP_BOVIN;CON__P00978;tr|A0A3Q1MGB8|A0A3Q1MGB8_BOVIN	27;24;24;23	27;24;24;23	27;24;24;23	>tr|F1MMK9|F1MMK9_BOVIN Kinesin family member 12 OS=Bos taurus OX=9913 GN=KIF12 PE=4 SV=3;>sp|P00978|AMBP_BOVIN Protein AMBP OS=Bos taurus OX=9913 GN=AMBP PE=1 SV=2;>P00978 SWISS-PROT:P00978 (Bos taurus) AMBP protein precursor;>tr|A0A3Q1MGB8|A0A3Q1MGB8_BOV	4	27	27	27	24	18	21	24	18	21	24	18	21	40.2	40.2	40.2	53.002	482	482;352;352;516	3.28	24	33	35	7	20	25	0	323.31	By MS/MS	By MS/MS	By MS/MS	31332000	37188000	32801000	31868000	28107000	31485000	34856000	46157000	32981000	34251000	31332000	37188000	32801000
tr|F1MMP5|F1MMP5_BOVIN	tr|F1MMP5|F1MMP5_BOVIN	39	39	3	>tr|F1MMP5|F1MMP5_BOVIN Inter-alpha-trypsin inhibitor heavy chain H1 OS=Bos taurus OX=9913 GN=ITIH1 PE=1 SV=1	1	39	39	3	37	35	29	37	35	29	2	2	3	46.6	46.6	2.6	101.24	906	906	3.36	48	65	41	30	63	36	0	323.31	By MS/MS	By MS/MS	By MS/MS	40913000	55031000	48183000	42885000	47143000	47328000	55674000	57232000	34606000	39825000	40913000	55031000	48183000
tr|F1MNV5|F1MNV5_BOVIN	tr|F1MNV5|F1MNV5_BOVIN	35	2	2	>tr|F1MNV5|F1MNV5_BOVIN Kininogen-1 OS=Bos taurus OX=9913 GN=KNG1 PE=4 SV=2	1	35	2	2	32	31	33	1	1	2	1	1	2	70.6	3.7	3.7	48.421	436	436	2.62	1	1	6				0	23.813	By MS/MS	By MS/MS	By MS/MS	184350	97084	107230	117890	122790	129200	114800	111340	140230	114660	184350	97084	107230
tr|F1MRD0|F1MRD0_BOVIN;sp|P63258|ACTG_BOVIN;sp|P60712|ACTB_BOVIN;tr|A0A452DJE4|A0A452DJE4_BOVIN;tr|G8JKX4|G8JKX4_BOVIN;sp|Q5E9B5|ACTH_BOVIN;sp|Q3ZC07|ACTC_BOVIN;sp|P68138|ACTS_BOVIN;sp|P62739|ACTA_BOVIN;tr|A0A3Q1M558|A0A3Q1M558_BOVIN;tr|A0A3Q1NKP5|A0A3Q1NKP5_BOVIN;tr|F1MKC4|F1MKC4_BOVIN	tr|F1MRD0|F1MRD0_BOVIN;sp|P63258|ACTG_BOVIN;sp|P60712|ACTB_BOVIN;tr|A0A452DJE4|A0A452DJE4_BOVIN;tr|G8JKX4|G8JKX4_BOVIN;sp|Q5E9B5|ACTH_BOVIN;sp|Q3ZC07|ACTC_BOVIN;sp|P68138|ACTS_BOVIN;sp|P62739|ACTA_BOVIN;tr|A0A3Q1M558|A0A3Q1M558_BOVIN;tr|A0A3Q1NKP5|A0A3Q1NKP5_BOVIN	9;9;9;7;7;7;7;7;7;7;5;4	9;9;9;7;7;7;7;7;7;7;5;4	9;9;9;7;7;7;7;7;7;7;5;4	>tr|F1MRD0|F1MRD0_BOVIN Actin, cytoplasmic 1 OS=Bos taurus OX=9913 GN=ACTB PE=3 SV=2;>sp|P63258|ACTG_BOVIN Actin, cytoplasmic 2 OS=Bos taurus OX=9913 GN=ACTG1 PE=1 SV=1;>sp|P60712|ACTB_BOVIN Actin, cytoplasmic 1 OS=Bos taurus OX=9913 GN=ACTB PE=1 SV=1;>tr|	12	9	9	9	6	7	8	6	7	8	6	7	8	27.2	27.2	27.2	41.851	375	375;375;375;340;375;376;377;377;377;392;376;376	2.87	4	6	6	4	2	1	0	194.44	By MS/MS	By MS/MS	By MS/MS	772280	745330	807990	1180600	749990	827120	813930	1029500	697340	898390	772280	745330	807990
tr|F1MTT3|F1MTT3_BOVIN;sp|P98140|FA12_BOVIN;tr|A0A3Q1M6N6|A0A3Q1M6N6_BOVIN	tr|F1MTT3|F1MTT3_BOVIN;sp|P98140|FA12_BOVIN;tr|A0A3Q1M6N6|A0A3Q1M6N6_BOVIN	9;9;8	9;9;8	9;9;8	>tr|F1MTT3|F1MTT3_BOVIN Coagulation factor XII OS=Bos taurus OX=9913 GN=F12 PE=3 SV=2;>sp|P98140|FA12_BOVIN Coagulation factor XII OS=Bos taurus OX=9913 GN=F12 PE=1 SV=2;>tr|A0A3Q1M6N6|A0A3Q1M6N6_BOVIN Coagulation factor XII OS=Bos taurus OX=9913 GN=F12 PE	3	9	9	9	6	5	6	6	5	6	6	5	6	16.1	16.1	16.1	66.249	603	603;612;562	3.73	3	5	2		9	3	0	96.873	By MS/MS	By MS/MS	By MS/MS	808480	944910	891740	917050	899380	1017800	994430	1182600	904660	1006000	808480	944910	891740
tr|F1MU18|F1MU18_BOVIN;tr|F1MGK8|F1MGK8_BOVIN	tr|F1MU18|F1MU18_BOVIN;tr|F1MGK8|F1MGK8_BOVIN	2;2	2;2	2;2	>tr|F1MU18|F1MU18_BOVIN Oncostatin M receptor OS=Bos taurus OX=9913 GN=OSMR PE=4 SV=3;>tr|F1MGK8|F1MGK8_BOVIN Oncostatin M receptor OS=Bos taurus OX=9913 GN=OSMR PE=4 SV=3	2	2	2	2	1	2	1	1	2	1	1	2	1	5.9	5.9	5.9	39.173	339	339;366	6						4	0.0037313	2.4511	By MS/MS	By MS/MS	By matching	108740	125660	145310	97100	158210	118100	159520	141290	189190	115070	108740	125660	145310
tr|F1MUT4|F1MUT4_BOVIN;sp|Q5NTB3|FA11_BOVIN;tr|A0A3Q1LT55|A0A3Q1LT55_BOVIN	tr|F1MUT4|F1MUT4_BOVIN;sp|Q5NTB3|FA11_BOVIN;tr|A0A3Q1LT55|A0A3Q1LT55_BOVIN	6;6;6	6;6;6	6;6;6	>tr|F1MUT4|F1MUT4_BOVIN Coagulation factor XI OS=Bos taurus OX=9913 GN=F11 PE=3 SV=1;>sp|Q5NTB3|FA11_BOVIN Coagulation factor XI OS=Bos taurus OX=9913 GN=F11 PE=1 SV=1;>tr|A0A3Q1LT55|A0A3Q1LT55_BOVIN Coagulation factor XI OS=Bos taurus OX=9913 GN=F11 PE=3	3	6	6	6	4	3	5	4	3	5	4	3	5	11.8	11.8	11.8	69.885	625	625;625;640	4.61		1		6	9	2	0	62.809	By MS/MS	By MS/MS	By MS/MS	257230	373110	304600	257040	339020	379920	432020	261930	251590	241700	257230	373110	304600
tr|F1MVP0|F1MVP0_BOVIN	tr|F1MVP0|F1MVP0_BOVIN	3	3	3	>tr|F1MVP0|F1MVP0_BOVIN ADAM metallopeptidase with thrombospondin type 1 motif 13 OS=Bos taurus OX=9913 GN=ADAMTS13 PE=4 SV=3	1	3	3	3	2	3	2	2	3	2	2	3	2	2.1	2.1	2.1	102.84	957	957	3.12	1	3	2			2	0	20.572	By MS/MS	By MS/MS	By MS/MS	63330	71016	78431	70163	63556	61909	92917	55603	60050	63589	63330	71016	78431
tr|F1MW44|F1MW44_BOVIN;tr|A0A3Q1LTB9|A0A3Q1LTB9_BOVIN	tr|F1MW44|F1MW44_BOVIN;tr|A0A3Q1LTB9|A0A3Q1LTB9_BOVIN	7;6	7;6	5;4	>tr|F1MW44|F1MW44_BOVIN Coagulation factor XIII A chain OS=Bos taurus OX=9913 GN=F13A1 PE=4 SV=2;>tr|A0A3Q1LTB9|A0A3Q1LTB9_BOVIN Coagulation factor XIII A chain OS=Bos taurus OX=9913 GN=F13A1 PE=4 SV=1	2	7	7	5	4	3	4	4	3	4	3	3	3	13.5	13.5	8.3	82.803	732	732;668	3	4		2	3	1	1	0	48.474	By MS/MS	By MS/MS	By MS/MS	314790	961770	391090	345880	510420	323550	377170	346940	313760	352510	314790	961770	391090
tr|F1MXW5|F1MXW5_BOVIN;sp|Q0VCA7|OXSM_BOVIN	tr|F1MXW5|F1MXW5_BOVIN;sp|Q0VCA7|OXSM_BOVIN	1;1	1;1	1;1	>tr|F1MXW5|F1MXW5_BOVIN 3-oxoacyl-[acyl-carrier-protein] synthase, mitochondrial OS=Bos taurus OX=9913 GN=OXSM PE=3 SV=1;>sp|Q0VCA7|OXSM_BOVIN 3-oxoacyl-[acyl-carrier-protein] synthase, mitochondrial OS=Bos taurus OX=9913 GN=OXSM PE=2 SV=1	2	1	1	1	0	1	0	0	1	0	0	1	0	3	3	3	48.586	460	460;460	1	2						1	-2	By matching	By MS/MS	By matching	215930	180950	251630	230880	308960	166510	335730	264410	244290	183270	215930	180950	251630
tr|F1MY85|F1MY85_BOVIN;CON__Q1A7A4;sp|P12082|CO5_BOVIN	tr|F1MY85|F1MY85_BOVIN;CON__Q1A7A4	79;75;6	79;75;6	79;75;6	>tr|F1MY85|F1MY85_BOVIN Complement C5a anaphylatoxin OS=Bos taurus OX=9913 GN=C5 PE=1 SV=3;>Q1A7A4 TREMBL:Q1A7A4 (Bos taurus) similar to complement component C5	3	79	79	79	66	66	56	66	66	56	66	66	56	43.8	43.8	43.8	188.79	1677	1677;1677;74	3.35	67	54	42	68	45	48	0	323.31	By MS/MS	By MS/MS	By MS/MS	36412000	44187000	42439000	34538000	41638000	45866000	44230000	44653000	33430000	42439000	36412000	44187000	42439000
tr|F1MYX2|F1MYX2_BOVIN;tr|A0A3Q1MB70|A0A3Q1MB70_BOVIN	tr|F1MYX2|F1MYX2_BOVIN;tr|A0A3Q1MB70|A0A3Q1MB70_BOVIN	3;3	3;3	3;3	>tr|F1MYX2|F1MYX2_BOVIN Apolipoprotein M OS=Bos taurus OX=9913 GN=APOM PE=4 SV=1;>tr|A0A3Q1MB70|A0A3Q1MB70_BOVIN Apolipoprotein M OS=Bos taurus OX=9913 GN=APOM PE=4 SV=1	2	3	3	3	3	3	3	3	3	3	3	3	3	18.6	18.6	18.6	21.158	188	188;223	3.67		5	8		5	3	0	39.401	By MS/MS	By MS/MS	By MS/MS	1799500	1352300	1280200	1274500	1409900	1268900	1330800	1525300	1736200	1445200	1799500	1352300	1280200
tr|F1MZ96|F1MZ96_BOVIN;tr|F1MH40|F1MH40_BOVIN;CON__Q05B55	tr|F1MZ96|F1MZ96_BOVIN;tr|F1MH40|F1MH40_BOVIN;CON__Q05B55	11;10;10	11;10;10	11;10;10	>tr|F1MZ96|F1MZ96_BOVIN Uncharacterized protein OS=Bos taurus OX=9913 PE=1 SV=3;>tr|F1MH40|F1MH40_BOVIN Uncharacterized protein OS=Bos taurus OX=9913 PE=1 SV=2;>Q05B55 TREMBL:Q05B55 (Bos taurus) Similar to Ig kappa chain C region	3	11	11	11	11	11	11	11	11	11	11	11	11	34.6	34.6	34.6	26.664	240	240;240;240	3.44	27	12	18	15	33	12	0	323.31	By MS/MS	By MS/MS	By MS/MS	21405000	37060000	33596000	14878000	28532000	29423000	28306000	16437000	12887000	19779000	21405000	37060000	33596000
tr|F1N0H3|F1N0H3_BOVIN;sp|P00921|CAH2_BOVIN;tr|A0A3Q1MM44|A0A3Q1MM44_BOVIN	tr|F1N0H3|F1N0H3_BOVIN;sp|P00921|CAH2_BOVIN;tr|A0A3Q1MM44|A0A3Q1MM44_BOVIN	5;5;3	5;5;3	5;5;3	>tr|F1N0H3|F1N0H3_BOVIN Carbonic anhydrase 2 OS=Bos taurus OX=9913 GN=CA2 PE=1 SV=3;>sp|P00921|CAH2_BOVIN Carbonic anhydrase 2 OS=Bos taurus OX=9913 GN=CA2 PE=1 SV=3;>tr|A0A3Q1MM44|A0A3Q1MM44_BOVIN Carbonic anhydrase 2 OS=Bos taurus OX=9913 GN=CA2 PE=1 SV=	3	5	5	5	3	4	3	3	4	3	3	4	3	22.3	22.3	22.3	29.085	260	260;260;239	3.36	4		2	3	5		0	10.653	By MS/MS	By MS/MS	By MS/MS	472790	763480	817620	514090	483240	389380	503700	575010	341610	372200	472790	763480	817620
tr|F1N0I3|F1N0I3_BOVIN	tr|F1N0I3|F1N0I3_BOVIN	34	34	1	>tr|F1N0I3|F1N0I3_BOVIN Coagulation factor V OS=Bos taurus OX=9913 GN=F5 PE=3 SV=3	1	34	34	1	26	21	22	26	21	22	0	0	1	20.3	20.3	0.5	239.54	2121	2121	3.34	17	18	20	11	11	17	0	323.31	By MS/MS	By MS/MS	By MS/MS	6929200	5509200	6295200	7195100	6857400	6265900	7285500	8211800	8370700	7773800	6929200	5509200	6295200
tr|F1N102|F1N102_BOVIN	tr|F1N102|F1N102_BOVIN	25	25	25	>tr|F1N102|F1N102_BOVIN Complement C8 beta chain OS=Bos taurus OX=9913 GN=C8B PE=4 SV=3	1	25	25	25	17	15	19	17	15	19	17	15	19	40.7	40.7	40.7	66.685	590	590	3.49	11	14	14	18	7	14	0	323.31	By MS/MS	By MS/MS	By MS/MS	6375700	7240000	7520900	6440800	7668000	7556600	8024100	7688500	6036800	7496100	6375700	7240000	7520900
tr|F1N160|F1N160_BOVIN;tr|F1MLW7|F1MLW7_BOVIN;tr|A0A3Q1M4Z1|A0A3Q1M4Z1_BOVIN	tr|F1N160|F1N160_BOVIN;tr|F1MLW7|F1MLW7_BOVIN	13;11;4	2;0;0	0;0;0	>tr|F1N160|F1N160_BOVIN Uncharacterized protein OS=Bos taurus OX=9913 PE=4 SV=3;>tr|F1MLW7|F1MLW7_BOVIN Uncharacterized protein OS=Bos taurus OX=9913 PE=4 SV=3	3	13	2	0	11	10	11	1	0	1	0	0	0	79.2	6	0	33.943	317	317;139;264	1.25	3	1					0	75.309	By MS/MS	By matching	By MS/MS	186650	206130	131050	154340	134910	120750	190580	343210	188950	232410	186650	206130	131050
tr|F1N2K1|F1N2K1_BOVIN	tr|F1N2K1|F1N2K1_BOVIN	3	3	3	>tr|F1N2K1|F1N2K1_BOVIN Prenylcysteine oxidase 1 OS=Bos taurus OX=9913 GN=PCYOX1 PE=1 SV=2	1	3	3	3	2	3	2	2	3	2	2	3	2	6.5	6.5	6.5	56.775	508	508	4.57	2					5	0	12.62	By MS/MS	By MS/MS	By MS/MS	210320	221850	236970	182860	238450	254570	258740	261930	228140	215220	210320	221850	236970
tr|F1N3A1|F1N3A1_BOVIN;CON__Q28194;tr|A0A3Q1MQV3|A0A3Q1MQV3_BOVIN;sp|Q28178|TSP1_BOVIN;tr|F1MHQ8|F1MHQ8_BOVIN;tr|A0A3Q1MQX0|A0A3Q1MQX0_BOVIN;tr|F1N1W3|F1N1W3_BOVIN;sp|Q95116|TSP2_BOVIN	tr|F1N3A1|F1N3A1_BOVIN;CON__Q28194;tr|A0A3Q1MQV3|A0A3Q1MQV3_BOVIN;sp|Q28178|TSP1_BOVIN	24;24;24;23;1;1;1;1	24;24;24;23;1;1;1;1	24;24;24;23;1;1;1;1	>tr|F1N3A1|F1N3A1_BOVIN Thrombospondin-1 OS=Bos taurus OX=9913 GN=THBS1 PE=4 SV=1;>Q28194 TREMBL:Q28194 (Bos taurus) Thrombospondin-1;>tr|A0A3Q1MQV3|A0A3Q1MQV3_BOVIN Thrombospondin-1 OS=Bos taurus OX=9913 GN=THBS1 PE=4 SV=1;>sp|Q28178|TSP1_BOVIN Thrombospo	8	24	24	24	21	21	15	21	21	15	21	21	15	22.5	22.5	22.5	129.39	1170	1170;1170;1175;1170;947;956;1170;1170	3.76	17	8	4	14	22	15	0	323.31	By MS/MS	By MS/MS	By MS/MS	4224900	6842100	2657600	3087400	4192800	2367100	4775500	6882000	5764300	3713700	4224900	6842100	2657600
tr|F1N3Q7|F1N3Q7_BOVIN;sp|Q32PJ2|APOA4_BOVIN;CON__Q32PJ2;tr|A0A3Q1M3N0|A0A3Q1M3N0_BOVIN;tr|A0A3Q1MZJ9|A0A3Q1MZJ9_BOVIN	tr|F1N3Q7|F1N3Q7_BOVIN;sp|Q32PJ2|APOA4_BOVIN;CON__Q32PJ2;tr|A0A3Q1M3N0|A0A3Q1M3N0_BOVIN;tr|A0A3Q1MZJ9|A0A3Q1MZJ9_BOVIN	50;47;47;44;44	50;47;47;44;44	50;47;47;44;44	>tr|F1N3Q7|F1N3Q7_BOVIN Apolipoprotein A-IV OS=Bos taurus OX=9913 GN=APOA4 PE=3 SV=2;>sp|Q32PJ2|APOA4_BOVIN Apolipoprotein A-IV OS=Bos taurus OX=9913 GN=APOA4 PE=2 SV=1;>Q32PJ2 SWISS-PROT:Q32PJ2 (Bos taurus) Apolipoprotein A-IV precursor;>tr|A0A3Q1M3N0|A0A	5	50	50	50	47	42	46	47	42	46	47	42	46	65.6	65.6	65.6	52.29	465	465;380;380;378;404	3.73	52	43	54	57	85	59	0	323.31	By MS/MS	By MS/MS	By MS/MS	85455000	106280000	98431000	82028000	104970000	86549000	80044000	100340000	99479000	81072000	85455000	106280000	98431000
tr|F1N406|F1N406_BOVIN;tr|A0A3Q1LWS2|A0A3Q1LWS2_BOVIN;tr|A0A3Q1LJS2|A0A3Q1LJS2_BOVIN	tr|F1N406|F1N406_BOVIN;tr|A0A3Q1LWS2|A0A3Q1LWS2_BOVIN;tr|A0A3Q1LJS2|A0A3Q1LJS2_BOVIN	1;1;1	1;1;1	1;1;1	>tr|F1N406|F1N406_BOVIN Echinoderm microtubule associated protein like 6 OS=Bos taurus OX=9913 GN=EML6 PE=4 SV=2;>tr|A0A3Q1LWS2|A0A3Q1LWS2_BOVIN Echinoderm microtubule associated protein like 6 OS=Bos taurus OX=9913 GN=EML6 PE=4 SV=1;>tr|A0A3Q1LJS2|A0A3Q1L	3	1	1	1	1	1	0	1	1	0	1	1	0	0.5	0.5	0.5	217.8	1958	1958;1965;1998	2		2					1	-2	By MS/MS	By MS/MS	By matching	57800	188290	95543	58043	63826	42611	46119	114370	44371	40316	57800	188290	95543
tr|F1N455|F1N455_BOVIN;sp|Q3ZCJ8|CATC_BOVIN	tr|F1N455|F1N455_BOVIN;sp|Q3ZCJ8|CATC_BOVIN	5;5	5;5	5;5	>tr|F1N455|F1N455_BOVIN Dipeptidyl peptidase 1 OS=Bos taurus OX=9913 GN=CTSC PE=3 SV=1;>sp|Q3ZCJ8|CATC_BOVIN Dipeptidyl peptidase 1 OS=Bos taurus OX=9913 GN=CTSC PE=2 SV=1	2	5	5	5	2	1	5	2	1	5	2	1	5	14	14	14	51.978	463	463;463	4.11	1	1		1	6		0	9.903	By MS/MS	By matching	By MS/MS	69280	123390	73689	81882	70996	66294	62299	86118	105900	95381	69280	123390	73689
tr|F1N5M2|F1N5M2_BOVIN;CON__ENSEMBL:ENSBTAP00000018229;tr|A0A3Q1MKX8|A0A3Q1MKX8_BOVIN;tr|A0A3Q1LQ02|A0A3Q1LQ02_BOVIN	tr|F1N5M2|F1N5M2_BOVIN;CON__ENSEMBL:ENSBTAP00000018229;tr|A0A3Q1MKX8|A0A3Q1MKX8_BOVIN;tr|A0A3Q1LQ02|A0A3Q1LQ02_BOVIN	47;43;41;41	47;43;41;41	5;5;2;2	>tr|F1N5M2|F1N5M2_BOVIN Vitamin D-binding protein OS=Bos taurus OX=9913 GN=GC PE=4 SV=2;>ENSEMBL:ENSBTAP00000018229 (Bos taurus) 54 kDa protein;>tr|A0A3Q1MKX8|A0A3Q1MKX8_BOVIN Vitamin D-binding protein OS=Bos taurus OX=9913 GN=GC PE=4 SV=1;>tr|A0A3Q1LQ02|A	4	47	47	5	41	40	43	41	40	43	5	4	5	70.9	70.9	7	53.356	474	474;475;465;475	3.46	54	82	87	87	73	52	0	323.31	By MS/MS	By MS/MS	By MS/MS	196300000	154100000	185240000	180800000	169500000	157080000	297460000	291640000	218220000	174470000	196300000	154100000	185240000
tr|F1N7F3|F1N7F3_BOVIN;tr|A0A3Q1M731|A0A3Q1M731_BOVIN;tr|A0A3Q1MHB0|A0A3Q1MHB0_BOVIN	tr|F1N7F3|F1N7F3_BOVIN;tr|A0A3Q1M731|A0A3Q1M731_BOVIN;tr|A0A3Q1MHB0|A0A3Q1MHB0_BOVIN	1;1;1	1;1;1	1;1;1	>tr|F1N7F3|F1N7F3_BOVIN Receptor protein-tyrosine kinase OS=Bos taurus OX=9913 GN=EGFR PE=3 SV=3;>tr|A0A3Q1M731|A0A3Q1M731_BOVIN Receptor protein-tyrosine kinase OS=Bos taurus OX=9913 GN=EGFR PE=3 SV=1;>tr|A0A3Q1MHB0|A0A3Q1MHB0_BOVIN Receptor protein-tyros	3	1	1	1	1	1	1	1	1	1	1	1	1	0.8	0.8	0.8	130.86	1179	1179;1203;1208	6						3	0	16.077	By MS/MS	By matching	By matching	40894	36345	34414	41782	40336	42061	49722	45786	34518	39960	40894	36345	34414
tr|F6PSK5|F6PSK5_BOVIN;tr|A0A3Q1MKU4|A0A3Q1MKU4_BOVIN;tr|A0A3Q1LQK2|A0A3Q1LQK2_BOVIN;tr|E1BFL8|E1BFL8_BOVIN	tr|F6PSK5|F6PSK5_BOVIN;tr|A0A3Q1MKU4|A0A3Q1MKU4_BOVIN;tr|A0A3Q1LQK2|A0A3Q1LQK2_BOVIN;tr|E1BFL8|E1BFL8_BOVIN	4;4;4;4	4;4;4;4	4;4;4;4	>tr|F6PSK5|F6PSK5_BOVIN Interleukin 1 receptor accessory protein OS=Bos taurus OX=9913 GN=IL1RAP PE=4 SV=1;>tr|A0A3Q1MKU4|A0A3Q1MKU4_BOVIN Interleukin 1 receptor accessory protein OS=Bos taurus OX=9913 GN=IL1RAP PE=4 SV=1;>tr|A0A3Q1LQK2|A0A3Q1LQK2_BOVIN In	4	4	4	4	2	3	3	2	3	3	2	3	3	6.7	6.7	6.7	60.01	520	520;568;639;685	3.56	1	2		3	3		0	6.7753	By MS/MS	By MS/MS	By MS/MS	377420	378680	407720	357940	419280	426750	476160	442420	352550	408020	377420	378680	407720
tr|F6R4N7|F6R4N7_BOVIN	tr|F6R4N7|F6R4N7_BOVIN	3	3	3	>tr|F6R4N7|F6R4N7_BOVIN Superoxide dismutase [Cu-Zn] OS=Bos taurus OX=9913 GN=SOD3 PE=1 SV=1	1	3	3	3	2	3	2	2	3	2	2	3	2	17.1	17.1	17.1	27.39	252	252	3		2	3	2			0	60.922	By MS/MS	By MS/MS	By MS/MS	115290	152720	134860	87339	142240	158110	147240	150440	116270	109790	115290	152720	134860
tr|G3MWT1|G3MWT1_BOVIN;tr|A0A3Q1LLT0|A0A3Q1LLT0_BOVIN	tr|G3MWT1|G3MWT1_BOVIN;tr|A0A3Q1LLT0|A0A3Q1LLT0_BOVIN	4;4	2;2	2;2	>tr|G3MWT1|G3MWT1_BOVIN Uncharacterized protein OS=Bos taurus OX=9913 PE=4 SV=2;>tr|A0A3Q1LLT0|A0A3Q1LLT0_BOVIN Uncharacterized protein OS=Bos taurus OX=9913 PE=4 SV=1	2	4	2	2	3	3	3	2	2	1	2	2	1	24.6	14.2	14.2	22.957	211	211;220	1.27	8	3					0	45.366	By MS/MS	By MS/MS	By matching	1253300	1054200	1253900	1048300	1373000	1445000	1134300	1269200	964330	1235900	1253300	1054200	1253900
tr|G3MXB5|G3MXB5_BOVIN;tr|A0A3Q1LRW4|A0A3Q1LRW4_BOVIN	tr|G3MXB5|G3MXB5_BOVIN;tr|A0A3Q1LRW4|A0A3Q1LRW4_BOVIN	9;9	9;9	9;9	>tr|G3MXB5|G3MXB5_BOVIN Uncharacterized protein OS=Bos taurus OX=9913 PE=1 SV=2;>tr|A0A3Q1LRW4|A0A3Q1LRW4_BOVIN Uncharacterized protein OS=Bos taurus OX=9913 PE=1 SV=1	2	9	9	9	5	7	9	5	7	9	5	7	9	22.4	22.4	22.4	36.405	344	344;442	4.24	7	3		5	8	14	0	201.32	By MS/MS	By MS/MS	By MS/MS	8079300	15608000	7044700	8020800	6980600	9471900	9038200	10116000	3936800	4843900	8079300	15608000	7044700
tr|G3MYG2|G3MYG2_BOVIN	tr|G3MYG2|G3MYG2_BOVIN	1	1	1	>tr|G3MYG2|G3MYG2_BOVIN Zinc finger protein 782 OS=Bos taurus OX=9913 GN=ZNF782 PE=4 SV=2	1	1	1	1	1	1	1	1	1	1	1	1	1	1.6	1.6	1.6	77.707	671	671	5.1					9	1	1	-2	By MS/MS	By MS/MS	By MS/MS	1203500	580930	617350	1482600	440820	725750	797810	2036100	1201300	1793200	1203500	580930	617350
tr|G3MZE0|G3MZE0_BOVIN	tr|G3MZE0|G3MZE0_BOVIN	4	1	1	>tr|G3MZE0|G3MZE0_BOVIN Uncharacterized protein OS=Bos taurus OX=9913 PE=4 SV=2	1	4	1	1	4	4	3	1	1	1	1	1	1	36.7	21.6	21.6	14.451	139	139	2.25		3	1				0	88.309	By MS/MS	By MS/MS	By MS/MS	112740	87193	71667	129020	84660	112940	98472	104300	147830	113690	112740	87193	71667
tr|G3N0S9|G3N0S9_BOVIN;CON__ENSEMBL:ENSBTAP00000034412	tr|G3N0S9|G3N0S9_BOVIN;CON__ENSEMBL:ENSBTAP00000034412	18;18	18;18	18;18	>tr|G3N0S9|G3N0S9_BOVIN Uncharacterized protein OS=Bos taurus OX=9913 PE=4 SV=2;>ENSEMBL:ENSBTAP00000034412 (Bos taurus) similar to C4b-binding protein alpha chain	2	18	18	18	15	17	17	15	17	17	15	17	17	72.9	72.9	72.9	21.488	192	192;199	3.31	44	27	10	21	33	26	0	323.31	By MS/MS	By MS/MS	By MS/MS	42340000	32079000	42859000	41954000	49941000	37808000	54605000	46453000	41988000	39897000	42340000	32079000	42859000
tr|G3N0V0|G3N0V0_BOVIN;tr|A0A3Q1N3I9|A0A3Q1N3I9_BOVIN	tr|G3N0V0|G3N0V0_BOVIN;tr|A0A3Q1N3I9|A0A3Q1N3I9_BOVIN	25;21	12;8	11;7	>tr|G3N0V0|G3N0V0_BOVIN Uncharacterized protein OS=Bos taurus OX=9913 PE=1 SV=1;>tr|A0A3Q1N3I9|A0A3Q1N3I9_BOVIN Uncharacterized protein OS=Bos taurus OX=9913 PE=1 SV=1	2	25	12	11	24	22	17	11	10	9	10	9	8	61.7	25.8	21.8	35.951	326	326;320	3.29	30	24	14	15	24	19	0	323.31	By MS/MS	By MS/MS	By MS/MS	85738000	110690000	92363000	29222000	118050000	69668000	68780000	213510000	81914000	126700000	85738000	110690000	92363000
tr|G3N148|G3N148_BOVIN;tr|G3N3Q3|G3N3Q3_BOVIN	tr|G3N148|G3N148_BOVIN;tr|G3N3Q3|G3N3Q3_BOVIN	4;4	2;2	2;2	>tr|G3N148|G3N148_BOVIN Uncharacterized protein OS=Bos taurus OX=9913 PE=4 SV=2;>tr|G3N3Q3|G3N3Q3_BOVIN Uncharacterized protein OS=Bos taurus OX=9913 PE=4 SV=2	2	4	2	2	3	2	2	2	1	0	2	1	0	31.7	22.8	22.8	13.165	123	123;189	1.71	6					1	0	10.463	By MS/MS	By MS/MS	By matching	460550	469090	420160	357620	620710	630700	638940	401700	588560	510470	460550	469090	420160
tr|G3N1H5|G3N1H5_BOVIN	tr|G3N1H5|G3N1H5_BOVIN	5	2	2	>tr|G3N1H5|G3N1H5_BOVIN Uncharacterized protein OS=Bos taurus OX=9913 GN=LOC100300716 PE=4 SV=2	1	5	2	2	4	4	3	2	2	0	2	2	0	38.9	32.3	32.3	18.153	167	167	2.25		3	1				0	68.806	By MS/MS	By MS/MS	By matching	117410	104720	113650	143320	138710	220890	116960	73036	110070	245150	117410	104720	113650
tr|G3N1U4|G3N1U4_BOVIN;sp|Q3ZEJ6|SPA33_BOVIN;tr|A0A452DJA9|A0A452DJA9_BOVIN	tr|G3N1U4|G3N1U4_BOVIN;sp|Q3ZEJ6|SPA33_BOVIN;tr|A0A452DJA9|A0A452DJA9_BOVIN	10;9;8	3;2;3	1;0;1	>tr|G3N1U4|G3N1U4_BOVIN Serpin A3-3 OS=Bos taurus OX=9913 GN=SERPINA3-3 PE=1 SV=1;>sp|Q3ZEJ6|SPA33_BOVIN Serpin A3-3 OS=Bos taurus OX=9913 GN=SERPINA3-3 PE=1 SV=2;>tr|A0A452DJA9|A0A452DJA9_BOVIN Serpin A3-3 OS=Bos taurus OX=9913 GN=SERPINA3-3 PE=1 SV=1	3	10	3	1	10	9	9	3	3	3	1	1	1	23.6	9	4.6	46.156	411	411;411;400	5.1				3	3	4	0	36.391	By MS/MS	By MS/MS	By MS/MS	467660	450820	462620	374710	424690	445080	392870	485460	288850	582970	467660	450820	462620
tr|G3N2D7|G3N2D7_BOVIN;tr|A0A3Q1MN72|A0A3Q1MN72_BOVIN;tr|A0A3Q1MR79|A0A3Q1MR79_BOVIN	tr|G3N2D7|G3N2D7_BOVIN;tr|A0A3Q1MN72|A0A3Q1MN72_BOVIN;tr|A0A3Q1MR79|A0A3Q1MR79_BOVIN	3;3;3	3;3;3	3;3;3	>tr|G3N2D7|G3N2D7_BOVIN Uncharacterized protein OS=Bos taurus OX=9913 PE=4 SV=2;>tr|A0A3Q1MN72|A0A3Q1MN72_BOVIN Uncharacterized protein OS=Bos taurus OX=9913 PE=4 SV=1;>tr|A0A3Q1MR79|A0A3Q1MR79_BOVIN Uncharacterized protein OS=Bos taurus OX=9913 PE=4 SV=1	3	3	3	3	3	3	3	3	3	3	3	3	3	18.1	18.1	18.1	12.147	116	116;130;191	2.53	10			7	2		0	30.651	By MS/MS	By MS/MS	By MS/MS	2479100	3163400	1807300	1843600	2217600	3647600	2210800	2919600	1753700	4177400	2479100	3163400	1807300
tr|G3N342|G3N342_BOVIN	tr|G3N342|G3N342_BOVIN	1	1	1	>tr|G3N342|G3N342_BOVIN Uncharacterized protein OS=Bos taurus OX=9913 PE=4 SV=2	1	1	1	1	0	1	0	0	1	0	0	1	0	1.8	1.8	1.8	54.923	491	491	2		1					0	11.1	By matching	By MS/MS	By matching	107290	279320	107770	91787	69261	206980	80500	124740	85560	87666	107290	279320	107770
tr|G3N3S2|G3N3S2_BOVIN;tr|A0A3Q1M320|A0A3Q1M320_BOVIN;tr|A0A3Q1LPZ8|A0A3Q1LPZ8_BOVIN;tr|A0A3Q1NCF4|A0A3Q1NCF4_BOVIN;tr|A0A3Q1MAS2|A0A3Q1MAS2_BOVIN;tr|G3MY87|G3MY87_BOVIN;tr|A0A3Q1M6D9|A0A3Q1M6D9_BOVIN;tr|A0A3Q1LU98|A0A3Q1LU98_BOVIN;tr|A0A3Q1LQ36|A0A3Q1LQ36_BOVIN;tr|A0A3Q1LSJ0|A0A3Q1LSJ0_BOVIN	tr|G3N3S2|G3N3S2_BOVIN;tr|A0A3Q1M320|A0A3Q1M320_BOVIN;tr|A0A3Q1LPZ8|A0A3Q1LPZ8_BOVIN;tr|A0A3Q1NCF4|A0A3Q1NCF4_BOVIN;tr|A0A3Q1MAS2|A0A3Q1MAS2_BOVIN;tr|G3MY87|G3MY87_BOVIN;tr|A0A3Q1M6D9|A0A3Q1M6D9_BOVIN;tr|A0A3Q1LU98|A0A3Q1LU98_BOVIN;tr|A0A3Q1LQ36|A0A3Q1LQ36_BOVIN;tr|A0A3Q1LSJ0|A0A3Q1LSJ0_BOVIN	21;19;19;19;19;19;18;18;18;18	21;19;19;19;19;19;18;18;18;18	21;19;19;19;19;19;18;18;18;18	>tr|G3N3S2|G3N3S2_BOVIN Maltase-glucoamylase OS=Bos taurus OX=9913 GN=MGAM PE=4 SV=2;>tr|A0A3Q1M320|A0A3Q1M320_BOVIN Maltase-glucoamylase OS=Bos taurus OX=9913 GN=MGAM PE=4 SV=1;>tr|A0A3Q1LPZ8|A0A3Q1LPZ8_BOVIN Maltase-glucoamylase OS=Bos taurus OX=9913 GN=	10	21	21	21	14	12	9	14	12	9	14	12	9	10.9	10.9	10.9	308.3	2714	2714;1629;1646;1765;1789;1793;1567;1619;1653;1695	3.39	8	12	7	8	8	8	0	323.31	By MS/MS	By MS/MS	By MS/MS	2742400	2996200	3799300	3210800	3862300	2723400	3681500	2664800	2651900	3351700	2742400	2996200	3799300
tr|G3X6N3|G3X6N3_BOVIN;sp|P24627|TRFL_BOVIN	tr|G3X6N3|G3X6N3_BOVIN	99;5	2;0	2;0	>tr|G3X6N3|G3X6N3_BOVIN Serotransferrin OS=Bos taurus OX=9913 GN=TF PE=1 SV=2	2	99	2	2	90	86	92	2	2	2	2	2	2	85.9	3.1	3.1	77.737	704	704;708	3.23	13	2		2	9	5	0	185.32	By MS/MS	By MS/MS	By MS/MS	1028300	1373000	1138400	907090	1133700	857030	1395400	1171200	1945100	749320	1028300	1373000	1138400
tr|G3X7F3|G3X7F3_BOVIN;tr|F1MC45|F1MC45_BOVIN;tr|E1BFN5|E1BFN5_BOVIN	tr|G3X7F3|G3X7F3_BOVIN;tr|F1MC45|F1MC45_BOVIN;tr|E1BFN5|E1BFN5_BOVIN	27;27;25	2;2;2	2;2;2	>tr|G3X7F3|G3X7F3_BOVIN Uncharacterized protein OS=Bos taurus OX=9913 GN=LOC100336868 PE=4 SV=2;>tr|F1MC45|F1MC45_BOVIN Uncharacterized protein OS=Bos taurus OX=9913 GN=LOC100336868 PE=4 SV=3;>tr|E1BFN5|E1BFN5_BOVIN Uncharacterized protein OS=Bos taurus OX	3	27	2	2	23	19	21	1	1	2	1	1	2	31.9	2.5	2.5	94.846	831	831;889;807	4				5			0	93.629	By MS/MS	By MS/MS	By MS/MS	216710	168620	882430	109880	154150	544990	48614	103120	124530	76860	216710	168620	882430
tr|G3X7G4|G3X7G4_BOVIN;tr|F1MIF2|F1MIF2_BOVIN;tr|A0A3Q1MCX0|A0A3Q1MCX0_BOVIN;sp|P63009|AP2B1_BOVIN;tr|A0A3Q1LMB5|A0A3Q1LMB5_BOVIN;tr|A0A3Q1M481|A0A3Q1M481_BOVIN;sp|Q08DS7|AP1B1_BOVIN	tr|G3X7G4|G3X7G4_BOVIN;tr|F1MIF2|F1MIF2_BOVIN;tr|A0A3Q1MCX0|A0A3Q1MCX0_BOVIN;sp|P63009|AP2B1_BOVIN;tr|A0A3Q1LMB5|A0A3Q1LMB5_BOVIN;tr|A0A3Q1M481|A0A3Q1M481_BOVIN;sp|Q08DS7|AP1B1_BOVIN	1;1;1;1;1;1;1	1;1;1;1;1;1;1	1;1;1;1;1;1;1	>tr|G3X7G4|G3X7G4_BOVIN AP complex subunit beta OS=Bos taurus OX=9913 GN=AP2B1 PE=3 SV=2;>tr|F1MIF2|F1MIF2_BOVIN AP complex subunit beta OS=Bos taurus OX=9913 GN=AP1B1 PE=3 SV=2;>tr|A0A3Q1MCX0|A0A3Q1MCX0_BOVIN AP complex subunit beta OS=Bos taurus OX=9913	7	1	1	1	1	1	1	1	1	1	1	1	1	1.6	1.6	1.6	85.457	763	763;828;846;937;939;951;951	2		3					0.007326	2.0034	By MS/MS	By MS/MS	By MS/MS	146340	105360	127300	175290	82266	98185	67687	87636	133440	117650	146340	105360	127300
tr|G3X7R7|G3X7R7_BOVIN;tr|G3N1W7|G3N1W7_BOVIN;tr|G3X7R8|G3X7R8_BOVIN;tr|A0A452DI48|A0A452DI48_BOVIN;tr|E1B953|E1B953_BOVIN;sp|Q2KJD0|TBB5_BOVIN;tr|E1BJB1|E1BJB1_BOVIN;sp|Q6B856|TBB2B_BOVIN;sp|Q3MHM5|TBB4B_BOVIN;tr|A0A452DIL8|A0A452DIL8_BOVIN;sp|Q2HJ81|TBB6_BOVIN;tr|E1BJK2|E1BJK2_BOVIN;tr|A0A3Q1M442|A0A3Q1M442_BOVIN;CON__ENSEMBL:ENSBTAP00000025008	tr|G3X7R7|G3X7R7_BOVIN;tr|G3N1W7|G3N1W7_BOVIN;tr|G3X7R8|G3X7R8_BOVIN;tr|A0A452DI48|A0A452DI48_BOVIN;tr|E1B953|E1B953_BOVIN;sp|Q2KJD0|TBB5_BOVIN;tr|E1BJB1|E1BJB1_BOVIN;sp|Q6B856|TBB2B_BOVIN;sp|Q3MHM5|TBB4B_BOVIN;tr|A0A452DIL8|A0A452DIL8_BOVIN;sp|Q2HJ81|TBB6_BOVIN;tr|E1BJK2|E1BJK2_BOVIN;tr|A0A3Q1M442|A0A3Q1M442_BOVIN;CON__ENSEMBL:ENSBTAP00000025008	1;1;1;1;1;1;1;1;1;1;1;1;1;1	1;1;1;1;1;1;1;1;1;1;1;1;1;1	1;1;1;1;1;1;1;1;1;1;1;1;1;1	>tr|G3X7R7|G3X7R7_BOVIN Tubulin beta chain OS=Bos taurus OX=9913 GN=TUBB2A PE=1 SV=1;>tr|G3N1W7|G3N1W7_BOVIN Tubulin beta chain OS=Bos taurus OX=9913 GN=TUBB2B PE=3 SV=1;>tr|G3X7R8|G3X7R8_BOVIN Tubulin beta chain OS=Bos taurus OX=9913 GN=TUBB6 PE=3 SV=1;>t	14	1	1	1	0	1	0	0	1	0	0	1	0	2.4	2.4	2.4	36.628	330	330;330;354;373;419;444;445;445;445;446;446;450;501;536	1	1						0.0037879	2.6229	By matching	By MS/MS	By matching	18152	13896	18922	53702	13144	24921	18056	15346	12341	24545	18152	13896	18922
tr|G3X8D7|G3X8D7_BOVIN;sp|P37141|GPX3_BOVIN	tr|G3X8D7|G3X8D7_BOVIN;sp|P37141|GPX3_BOVIN	5;5	5;5	5;5	>tr|G3X8D7|G3X8D7_BOVIN Glutathione peroxidase OS=Bos taurus OX=9913 GN=GPX3 PE=3 SV=1;>sp|P37141|GPX3_BOVIN Glutathione peroxidase 3 OS=Bos taurus OX=9913 GN=GPX3 PE=2 SV=2	2	5	5	5	5	5	5	5	5	5	5	5	5	25.9	25.9	25.9	25.341	224	224;226	1.94	6	6	3	1			0	99.958	By MS/MS	By MS/MS	By MS/MS	2708400	2410300	2919100	4256900	2773400	2902700	3120200	2831000	3212400	2947300	2708400	2410300	2919100
tr|G5E5H2|G5E5H2_BOVIN	tr|G5E5H2|G5E5H2_BOVIN	5	1	1	>tr|G5E5H2|G5E5H2_BOVIN Uncharacterized protein OS=Bos taurus OX=9913 PE=4 SV=2	1	5	1	1	5	4	2	1	1	0	1	1	0	36.7	21.6	21.6	14.558	139	139	2		2					0	11.789	By MS/MS	By MS/MS	By matching	30948	25750	27319	31793	27433	31011	23989	23606	34948	31159	30948	25750	27319
tr|G5E5T5|G5E5T5_BOVIN;tr|A0A3Q1LPI6|A0A3Q1LPI6_BOVIN	tr|G5E5T5|G5E5T5_BOVIN;tr|A0A3Q1LPI6|A0A3Q1LPI6_BOVIN	25;16	3;2	3;2	>tr|G5E5T5|G5E5T5_BOVIN Uncharacterized protein OS=Bos taurus OX=9913 PE=1 SV=2;>tr|A0A3Q1LPI6|A0A3Q1LPI6_BOVIN Uncharacterized protein OS=Bos taurus OX=9913 PE=1 SV=1	2	25	3	3	25	21	23	3	3	3	3	3	3	57.1	7.1	7.1	56.043	508	508;369	3.15		6	11			3	0	73.851	By MS/MS	By MS/MS	By MS/MS	1072200	1221100	1365800	1102000	1406800	879240	992710	741680	902420	986830	1072200	1221100	1365800
tr|G5E5V0|G5E5V0_BOVIN;sp|Q2KJ83|CBPN_BOVIN;CON__Q2KJ83	tr|G5E5V0|G5E5V0_BOVIN;sp|Q2KJ83|CBPN_BOVIN;CON__Q2KJ83	8;8;8	8;8;8	8;8;8	>tr|G5E5V0|G5E5V0_BOVIN Carboxypeptidase N catalytic chain OS=Bos taurus OX=9913 GN=CPN1 PE=4 SV=1;>sp|Q2KJ83|CBPN_BOVIN Carboxypeptidase N catalytic chain OS=Bos taurus OX=9913 GN=CPN1 PE=2 SV=1;>Q2KJ83 TREMBL:Q2KJ83 (Bos taurus) Similar to Carboxypeptida	3	8	8	8	6	6	6	6	6	6	6	6	6	22.9	22.9	22.9	52.634	462	462;462;462	3.93		5	4	13	4	4	0	116.88	By MS/MS	By MS/MS	By MS/MS	1006900	1210600	1147300	1035900	1310400	1330400	1342700	968020	1149600	1067200	1006900	1210600	1147300
tr|G5E5V1|G5E5V1_BOVIN	tr|G5E5V1|G5E5V1_BOVIN	6	5	1	>tr|G5E5V1|G5E5V1_BOVIN Uncharacterized protein OS=Bos taurus OX=9913 PE=4 SV=2	1	6	5	1	5	4	4	4	3	3	0	0	1	49.3	36.8	21.3	14.1	136	136	3.98	5	9		15	20	6	0	205.57	By MS/MS	By MS/MS	By MS/MS	21773000	16816000	13111000	27008000	14220000	20226000	21971000	25172000	39027000	25262000	21773000	16816000	13111000
tr|G5E5W1|G5E5W1_BOVIN	tr|G5E5W1|G5E5W1_BOVIN	1	1	1	>tr|G5E5W1|G5E5W1_BOVIN Coagulation factor VIII OS=Bos taurus OX=9913 GN=F8 PE=3 SV=1	1	1	1	1	1	1	1	1	1	1	1	1	1	0.6	0.6	0.6	263.54	2323	2323	2		3					0	8.8119	By matching	By MS/MS	By MS/MS	179850	146040	186180	167480	170520	176750	238640	144970	160940	205860	179850	146040	186180
tr|G5E604|G5E604_BOVIN;tr|A0A3Q1MU51|A0A3Q1MU51_BOVIN;tr|A0A3Q1LXG6|A0A3Q1LXG6_BOVIN	tr|G5E604|G5E604_BOVIN;tr|A0A3Q1MU51|A0A3Q1MU51_BOVIN;tr|A0A3Q1LXG6|A0A3Q1LXG6_BOVIN	2;2;2	2;2;2	2;2;2	>tr|G5E604|G5E604_BOVIN Uncharacterized protein OS=Bos taurus OX=9913 PE=4 SV=2;>tr|A0A3Q1MU51|A0A3Q1MU51_BOVIN Uncharacterized protein OS=Bos taurus OX=9913 PE=4 SV=1;>tr|A0A3Q1LXG6|A0A3Q1LXG6_BOVIN Uncharacterized protein OS=Bos taurus OX=9913 PE=4 SV=1	3	2	2	2	2	2	1	2	2	1	2	2	1	13	13	13	12.941	123	123;137;142	3.35	2		5	10			0	19.004	By MS/MS	By MS/MS	By MS/MS	525630	613600	534770	516900	437570	769210	459550	507940	410860	707000	525630	613600	534770
tr|G8JKZ1|G8JKZ1_BOVIN;sp|P15396|ENPP3_BOVIN	tr|G8JKZ1|G8JKZ1_BOVIN;sp|P15396|ENPP3_BOVIN	1;1	1;1	1;1	>tr|G8JKZ1|G8JKZ1_BOVIN Ectonucleotide pyrophosphatase/phosphodiesterase family member 3 OS=Bos taurus OX=9913 GN=ENPP3 PE=4 SV=1;>sp|P15396|ENPP3_BOVIN Ectonucleotide pyrophosphatase/phosphodiesterase family member 3 OS=Bos taurus OX=9913 GN=ENPP3 PE=1 SV	2	1	1	1	0	1	1	0	1	1	0	1	1	1.9	1.9	1.9	99.494	874	874;874	5.2				1	2	2	1	-2	By matching	By MS/MS	By MS/MS	163750	131370	141830	161360	100880	67770	161860	306280	131480	146100	163750	131370	141830
tr|Q09TE3|Q09TE3_BOVIN	tr|Q09TE3|Q09TE3_BOVIN	17	17	17	>tr|Q09TE3|Q09TE3_BOVIN Insulin-like growth factor binding protein acid labile subunit OS=Bos taurus OX=9913 GN=IGFALS PE=2 SV=1	1	17	17	17	14	12	11	14	12	11	14	12	11	35.5	35.5	35.5	65.968	611	611	2.74	15	12	13	1	9	3	0	186.56	By MS/MS	By MS/MS	By MS/MS	2225500	2220000	2549600	2285900	2414400	2777800	2925200	2441800	2293100	2659600	2225500	2220000	2549600
tr|Q0VCH9|Q0VCH9_BOVIN;tr|F6RBS0|F6RBS0_BOVIN	tr|Q0VCH9|Q0VCH9_BOVIN;tr|F6RBS0|F6RBS0_BOVIN	1;1	1;1	1;1	>tr|Q0VCH9|Q0VCH9_BOVIN GLI pathogenesis-related 2 OS=Bos taurus OX=9913 GN=GLIPR2 PE=2 SV=1;>tr|F6RBS0|F6RBS0_BOVIN GLI pathogenesis related 2 OS=Bos taurus OX=9913 GN=GLIPR2 PE=3 SV=1	2	1	1	1	1	1	1	1	1	1	1	1	1	8.4	8.4	8.4	17.209	154	154;154	4				3			0	4.5972	By matching	By MS/MS	By MS/MS	15152	16104	16266	13589	18764	14962	18151	17875	16847	16354	15152	16104	16266
tr|Q17QH1|Q17QH1_BOVIN	tr|Q17QH1|Q17QH1_BOVIN	2	2	2	>tr|Q17QH1|Q17QH1_BOVIN APOF protein OS=Bos taurus OX=9913 GN=APOF PE=2 SV=2	1	2	2	2	2	1	1	2	1	1	2	1	1	9.4	9.4	9.4	33.677	307	307	3		3				1	0	26.171	By MS/MS	By MS/MS	By MS/MS	230380	224390	241690	181870	313210	286590	286410	211550	139850	230310	230380	224390	241690
tr|Q1RMN9|Q1RMN9_BOVIN	tr|Q1RMN9|Q1RMN9_BOVIN	7	2	2	>tr|Q1RMN9|Q1RMN9_BOVIN C4b-binding protein alpha-like OS=Bos taurus OX=9913 GN=LOC510860 PE=2 SV=1	1	7	2	2	6	7	6	2	2	2	2	2	2	46.4	15.8	15.8	21.996	196	196	4.4				6	4		0	54.863	By MS/MS	By MS/MS	By MS/MS	998770	1308000	962570	739950	993130	1009100	2421000	1208700	462720	1109500	998770	1308000	962570
tr|Q2KIH2|Q2KIH2_BOVIN;CON__Q2KIH2	tr|Q2KIH2|Q2KIH2_BOVIN;CON__Q2KIH2	11;11	11;11	11;11	>tr|Q2KIH2|Q2KIH2_BOVIN ApoN protein OS=Bos taurus OX=9913 GN=ApoN PE=2 SV=1;>Q2KIH2 TREMBL:Q2KIH2;Q68RU0 (Bos taurus) Ovarian and testicular apolipoprotein N	2	11	11	11	8	9	11	8	9	11	8	9	11	26.4	26.4	26.4	28.535	254	254;259	4.27	6	3	10	13	23	15	0	323.31	By MS/MS	By MS/MS	By MS/MS	11161000	15050000	14980000	11146000	15166000	16656000	12585000	11313000	9099800	11868000	11161000	15050000	14980000
tr|Q2KIW1|Q2KIW1_BOVIN	tr|Q2KIW1|Q2KIW1_BOVIN	14	14	14	>tr|Q2KIW1|Q2KIW1_BOVIN Paraoxonase 1 OS=Bos taurus OX=9913 GN=PON1 PE=1 SV=1	1	14	14	14	10	12	8	10	12	8	10	12	8	51.5	51.5	51.5	39.841	355	355	4.09	2	6	16	13	20	10	0	199.05	By MS/MS	By MS/MS	By MS/MS	11876000	17280000	14247000	12555000	14142000	10883000	13789000	15998000	11297000	11695000	11876000	17280000	14247000
tr|Q2KIW4|Q2KIW4_BOVIN	tr|Q2KIW4|Q2KIW4_BOVIN	3	3	3	>tr|Q2KIW4|Q2KIW4_BOVIN Lecithin-cholesterol acyltransferase OS=Bos taurus OX=9913 GN=LCAT PE=2 SV=1	1	3	3	3	3	3	2	3	3	2	3	3	2	6.6	6.6	6.6	49.844	440	440	4.3		1	2	3	1	3	0	43.244	By MS/MS	By MS/MS	By MS/MS	608710	691020	682940	540840	817690	678470	864640	649850	561430	652980	608710	691020	682940
tr|Q32PA1|Q32PA1_BOVIN	tr|Q32PA1|Q32PA1_BOVIN	5	5	5	>tr|Q32PA1|Q32PA1_BOVIN CD59 molecule OS=Bos taurus OX=9913 GN=CD59 PE=2 SV=1	1	5	5	5	5	5	4	5	5	4	5	5	4	30.6	30.6	30.6	13.663	121	121	3.62		8	12	15	9	1	0	82.43	By MS/MS	By MS/MS	By MS/MS	6353000	7322300	7270700	7008000	8489800	7766800	6918300	7505900	5241100	8538200	6353000	7322300	7270700
tr|Q3SYR0|Q3SYR0_BOVIN;sp|Q9TT36|THBG_BOVIN;CON__Q9TT36	tr|Q3SYR0|Q3SYR0_BOVIN;sp|Q9TT36|THBG_BOVIN;CON__Q9TT36	12;12;12	12;12;12	12;12;12	>tr|Q3SYR0|Q3SYR0_BOVIN Serpin peptidase inhibitor, clade A (Alpha-1 antiproteinase, antitrypsin), member 7 OS=Bos taurus OX=9913 GN=SERPINA7 PE=2 SV=1;>sp|Q9TT36|THBG_BOVIN Thyroxine-binding globulin OS=Bos taurus OX=9913 GN=SERPINA7 PE=2 SV=1;>Q9TT36 SWI	3	12	12	12	9	11	7	9	11	7	9	11	7	35.5	35.5	35.5	46.035	411	411;411;411	3.13	10	4	13		4	7	0	323.31	By MS/MS	By MS/MS	By MS/MS	4667000	5180600	5266300	4344900	6260300	5072800	6620400	6027000	4430700	4814900	4667000	5180600	5266300
tr|Q3SYR8|Q3SYR8_BOVIN	tr|Q3SYR8|Q3SYR8_BOVIN	4	4	4	>tr|Q3SYR8|Q3SYR8_BOVIN Immunoglobulin J chain OS=Bos taurus OX=9913 GN=JCHAIN PE=1 SV=1	1	4	4	4	4	3	4	4	3	4	4	3	4	25.5	25.5	25.5	17.857	157	157	2.24		13	4				0	87.696	By MS/MS	By MS/MS	By MS/MS	3477500	4557400	3649600	3399800	3553300	3240800	3948800	4456800	2352000	4174900	3477500	4557400	3649600
tr|Q3SZZ9|Q3SZZ9_BOVIN;tr|F1MGU7|F1MGU7_BOVIN;sp|P12799|FIBG_BOVIN;tr|A0A3Q1MV91|A0A3Q1MV91_BOVIN;tr|A0A3Q1N064|A0A3Q1N064_BOVIN	tr|Q3SZZ9|Q3SZZ9_BOVIN;tr|F1MGU7|F1MGU7_BOVIN;sp|P12799|FIBG_BOVIN;tr|A0A3Q1MV91|A0A3Q1MV91_BOVIN;tr|A0A3Q1N064|A0A3Q1N064_BOVIN	4;4;4;3;3	4;4;4;3;3	4;4;4;3;3	>tr|Q3SZZ9|Q3SZZ9_BOVIN FGG protein OS=Bos taurus OX=9913 GN=FGG PE=2 SV=1;>tr|F1MGU7|F1MGU7_BOVIN Fibrinogen gamma-B chain OS=Bos taurus OX=9913 GN=FGG PE=4 SV=1;>sp|P12799|FIBG_BOVIN Fibrinogen gamma-B chain OS=Bos taurus OX=9913 GN=FGG PE=1 SV=1;>tr|A0A	5	4	4	4	4	1	3	4	1	3	4	1	3	12.9	12.9	12.9	49.166	435	435;443;444;420;426	4.38	2				3	3	0	158.09	By MS/MS	By MS/MS	By MS/MS	283690	247800	277730	270180	330160	257530	302490	397320	305110	333640	283690	247800	277730
tr|Q3ZBS7|Q3ZBS7_BOVIN;CON__Q3ZBS7;tr|A0A3Q1LNE9|A0A3Q1LNE9_BOVIN	tr|Q3ZBS7|Q3ZBS7_BOVIN;CON__Q3ZBS7;tr|A0A3Q1LNE9|A0A3Q1LNE9_BOVIN	17;16;14	17;16;14	17;16;14	>tr|Q3ZBS7|Q3ZBS7_BOVIN Vitronectin OS=Bos taurus OX=9913 GN=VTN PE=1 SV=1;>Q3ZBS7 TREMBL:Q3ZBS7 (Bos taurus) Vitronectin;>tr|A0A3Q1LNE9|A0A3Q1LNE9_BOVIN Vitronectin OS=Bos taurus OX=9913 GN=VTN PE=1 SV=1	3	17	17	17	14	16	14	14	16	14	14	16	14	47.9	47.9	47.9	53.575	476	476;484;469	2.86	27	22	30	10	16	6	0	323.31	By MS/MS	By MS/MS	By MS/MS	19071000	22444000	20002000	17218000	21170000	17144000	24166000	23026000	17855000	19660000	19071000	22444000	20002000
tr|Q3ZCL0|Q3ZCL0_BOVIN	tr|Q3ZCL0|Q3ZCL0_BOVIN	2	2	2	>tr|Q3ZCL0|Q3ZCL0_BOVIN Cysteine-rich secretory protein 2 OS=Bos taurus OX=9913 GN=CRISP3 PE=2 SV=1	1	2	2	2	2	1	1	2	1	1	2	1	1	9	9	9	27.453	244	244	5.4					3	2	0	2.897	By MS/MS	By MS/MS	By MS/MS	39346	38834	42845	32973	38268	32089	53406	48117	31700	46460	39346	38834	42845
tr|Q58DL9|Q58DL9_BOVIN	tr|Q58DL9|Q58DL9_BOVIN	5	5	5	>tr|Q58DL9|Q58DL9_BOVIN Phospholipid transfer protein OS=Bos taurus OX=9913 GN=PLTP PE=2 SV=1	1	5	5	5	5	4	0	5	4	0	5	4	0	16.3	16.3	16.3	56.428	510	510	3.44	2		4		1	2	0	29.771	By MS/MS	By MS/MS	By matching	114750	124120	120080	123570	122290	153510	140700	116330	129720	120930	114750	124120	120080
tr|Q58DP6|Q58DP6_BOVIN;sp|P15467|RNAS4_BOVIN	tr|Q58DP6|Q58DP6_BOVIN;sp|P15467|RNAS4_BOVIN	3;2	3;2	3;2	>tr|Q58DP6|Q58DP6_BOVIN Ribonuclease A family member 4 OS=Bos taurus OX=9913 GN=RNASE4 PE=2 SV=1;>sp|P15467|RNAS4_BOVIN Ribonuclease 4 OS=Bos taurus OX=9913 GN=RNASE4 PE=1 SV=4	2	3	3	3	2	3	2	2	3	2	2	3	2	28.6	28.6	28.6	16.938	147	147;119	4.38	2				3	3	0	44.544	By MS/MS	By MS/MS	By MS/MS	308090	170960	177910	414340	178890	207430	230720	482420	475960	289370	308090	170960	177910
tr|Q5GN72|Q5GN72_BOVIN;sp|Q3SZR3|A1AG_BOVIN;CON__Q3SZR3;tr|A0A3Q1LS55|A0A3Q1LS55_BOVIN	tr|Q5GN72|Q5GN72_BOVIN;sp|Q3SZR3|A1AG_BOVIN;CON__Q3SZR3;tr|A0A3Q1LS55|A0A3Q1LS55_BOVIN	19;19;19;13	19;19;19;13	19;19;19;13	>tr|Q5GN72|Q5GN72_BOVIN Alpha-1-acid glycoprotein OS=Bos taurus OX=9913 GN=agp PE=2 SV=2;>sp|Q3SZR3|A1AG_BOVIN Alpha-1-acid glycoprotein OS=Bos taurus OX=9913 GN=ORM1 PE=2 SV=1;>Q3SZR3 SWISS-PROT:Q3SZR3 (Bos taurus) Alpha-1-acid glycoprotein precursor;>tr|	4	19	19	19	16	16	16	16	16	16	16	16	16	55	55	55	23.158	202	202;202;202;187	3.53	21	30	26	30	42	15	0	323.31	By MS/MS	By MS/MS	By MS/MS	42928000	65027000	30888000	19271000	39367000	35014000	30786000	33914000	32224000	76840000	42928000	65027000	30888000
tr|Q9GKR3|Q9GKR3_BOVIN;tr|F6RXU6|F6RXU6_BOVIN;tr|A7MBB0|A7MBB0_BOVIN	tr|Q9GKR3|Q9GKR3_BOVIN;tr|F6RXU6|F6RXU6_BOVIN;tr|A7MBB0|A7MBB0_BOVIN	2;1;1	2;1;1	2;1;1	>tr|Q9GKR3|Q9GKR3_BOVIN Vascular cell adhesion molecule-1 7D variant OS=Bos taurus OX=9913 GN=VCAM1 PE=2 SV=1;>tr|F6RXU6|F6RXU6_BOVIN Uncharacterized protein OS=Bos taurus OX=9913 GN=LOC534578 PE=4 SV=1;>tr|A7MBB0|A7MBB0_BOVIN VCAM1 protein OS=Bos taurus O	3	2	2	2	1	2	0	1	2	0	1	2	0	3.9	3.9	3.9	81.397	739	739;651;740	2.67		1	2				0	15.172	By matching	By MS/MS	By matching	55538	66083	77591	69023	71874	60091	102580	64906	68736	71325	55538	66083	77591
[truncated: 131 more columns]
